# Supplementary material for: Cellular glycan modification by B3GAT1 broadly restricts influenza virus infection
Source: Nat Commun. 2022 Oct 29;13:6456. doi: 10.1038/s41467-022-34111-0 (PMC9617049; doi:10.1038/s41467-022-34111-0)
Supplement: Supplementary file 4 — Supplementary Data 2 [file 41467_2022_34111_MOESM4_ESM.xlsx]

## Sheet: Supplementary Dataset 2
id	num	neg|score	neg|p-value	neg|fdr	neg|rank	neg|goodsgrna	neg|lfc	pos|score	pos|p-value	pos|fdr	pos|rank	pos|goodsgrna	pos|lfc	log score
NXPE4	3	0.93179	0.93191	0.999709	17527	0	5.0363	1.99e-07	7.86e-07	0.014851	1	2	5.0363	6.70115
B3GAT1	3	1	1	1	18885	0	2.9495	9.37e-07	2.36e-06	0.022277	2	2	2.9495	6.02826
B4GALNT2	3	0.55167	0.67617	0.999709	12663	1	-1.6225	2.66e-05	3.7e-05	0.232673	3	1	-1.6225	4.57512
TGM2	3	0.87731	0.87739	0.999709	16444	0	-3.5074	0.0001331	0.00015545	0.733911	4	1	-3.5074	3.87582
ANXA11	3	0.4286	0.58391	0.999709	10906	2	-4.2808	0.00018634	0.00020211	0.763366	5	1	-4.2808	3.72969
GPHA2	3	0.76595	0.78806	0.999709	14748	1	-3.1046	0.00023958	0.00025716	0.779428	6	1	-3.1046	3.62055
MYF6	3	0.29727	0.45008	0.999709	8445	1	-3.8645	0.00029282	0.00031273	0.779428	7	1	-3.8645	3.5334
FAM181A	3	0.71919	0.75907	0.999709	14235	1	-4.1604	0.00034605	0.00037145	0.779428	8	1	-4.1604	3.46086
CACNA2D3	2	0.82791	0.82747	0.999709	15615	0	0.95963	0.00037268	0.00035939	0.779428	9	1	0.95963	3.42866
TSPYL5	3	0.21573	0.36478	0.999709	6804	2	-4.4974	0.00045251	0.00048941	0.824811	10	1	-4.4974	3.34437
EID3	3	0.27167	0.4234	0.999709	7923	1	-3.8602	0.00050574	0.0005387	0.824811	11	1	-3.8602	3.29607
C2orf69	3	0.099587	0.22002	0.995571	4128	2	-4.8397	0.00061219	0.00063516	0.824811	12	1	-4.8397	3.21311
AIF1	3	0.85952	0.86013	0.999709	16134	1	-3.2808	0.00066541	0.00068392	0.824811	13	1	-3.2808	3.17691
PRR36	3	0.28806	0.44041	0.999709	8261	2	-4.5055	0.00071863	0.00073687	0.824811	14	1	-4.5055	3.14349
HCAR2	2	0.73632	0.73603	0.999709	14430	1	-0.034669	0.00072754	0.00070332	0.824811	15	1	-0.034669	3.13814
PDCD10	3	0.8248	0.83032	0.999709	15558	1	-2.4014	0.00082506	0.00086113	0.824811	16	1	-2.4014	3.08351
MPP5	3	0.10256	0.22568	0.995571	4228	1	-4.0218	0.00087827	0.00091041	0.824811	17	1	-4.0218	3.05637
ATP6V1C1	3	0.9996	0.9996	1	18873	0	-1.7748	0.00093149	0.0009707	0.824811	18	1	-1.7748	3.03082
S100A10	2	0.48394	0.53154	0.999709	11935	1	-0.70501	0.00094043	0.00090202	0.824811	19	1	-0.70501	3.02667
RPS15	3	0.98801	0.98818	0.999709	18645	0	-2.096	0.0009847	0.0010226	0.824811	20	1	-2.096	3.0067
PTPMT1	3	0.91289	0.913	0.999709	17142	0	-3.3617	0.0010379	0.001075	0.824811	21	1	-3.3617	2.98384
LIG1	3	0.3959	0.55097	0.999709	10290	2	-4.3537	0.0011443	0.0011767	0.824811	22	1	-4.3537	2.94146
TMPRSS12	3	0.062185	0.14594	0.990171	2752	1	-3.7564	0.0011975	0.001226	0.824811	23	1	-3.7564	2.92172
TMEM225B	3	0.83766	0.84086	0.999709	15769	1	-3.5342	0.0012507	0.0012727	0.824811	24	1	-3.5342	2.90285
IL15RA	3	0.49347	0.64839	0.999709	12124	1	-3.2898	0.0013039	0.0013325	0.824811	25	1	-3.2898	2.88476
NPY5R	3	0.67026	0.73193	0.999709	13696	1	-3.1046	0.0013571	0.0013812	0.824811	26	1	-3.1046	2.86739
IFITM2	3	0.96228	0.96251	0.999709	18129	0	-1.5036	0.0014635	0.0014908	0.824811	27	1	-1.5036	2.83461
NGEF	3	0.52803	0.66622	0.999709	12476	1	-3.1046	0.0015167	0.0015469	0.824811	28	1	-3.1046	2.8191
TMEM186	2	0.64448	0.65343	0.999709	13460	1	-1.5857	0.0015435	0.0015175	0.824811	29	1	-1.5857	2.81149
SLC5A1	3	0.59729	0.69632	0.999709	13057	1	-2.6149	0.0015699	0.0015988	0.824811	30	1	-2.6149	2.80413
KLF10	3	0.79027	0.80456	0.999709	15068	1	-1.6706	0.0016231	0.0016528	0.824811	31	1	-1.6706	2.78965
GATA5	3	0.36598	0.52069	0.999709	9741	1	-2.3903	0.0017294	0.0017587	0.824811	32	1	-2.3903	2.7621
PEX1	3	0.70989	0.7537	0.999709	14127	1	-3.0173	0.0017826	0.0018237	0.824811	33	1	-3.0173	2.74895
P2RY2	3	0.21985	0.36907	0.999709	6878	1	-3.4364	0.0018358	0.0018772	0.824811	34	1	-3.4364	2.73617
NMUR1	2	0.59458	0.61306	0.999709	13036	1	-1.716	0.0018627	0.0018662	0.824811	35	1	-1.716	2.72986
CCND3	3	0.02217	0.056869	0.925947	1129	1	-3.6006	0.001889	0.0019191	0.824811	36	1	-3.6006	2.72377
TNRC6A	3	0.94276	0.94295	0.999709	17740	0	-3.6204	0.0019422	0.0019705	0.824811	37	1	-3.6204	2.71171
OR6B3	2	0.22284	0.34755	0.999709	6930	1	-2.1874	0.0019691	0.0019757	0.824811	38	1	-2.1874	2.70573
BTN1A1	3	0.33763	0.4917	0.999709	9203	2	-4.4371	0.0019953	0.0020214	0.824811	39	1	-4.4371	2.69999
ITGAE	3	0.53168	0.66775	0.999709	12501	1	-3.8934	0.0020485	0.0020754	0.824811	40	1	-3.8934	2.68856
DICER1	3	0.84622	0.84822	0.999709	15899	1	-2.9088	0.0021017	0.0021351	0.824811	41	1	-2.9088	2.67743
ZNF189	2	0.42833	0.49375	0.999709	10902	1	-2.1361	0.0021464	0.0021535	0.824811	42	1	-2.1361	2.66829
SHC3	3	0.28725	0.43958	0.999709	8239	2	-4.5056	0.0021548	0.0021923	0.824811	43	1	-4.5056	2.66659
SHISA4	3	0.043545	0.10593	0.95989	2065	2	-4.3055	0.002208	0.0022368	0.824811	44	1	-4.3055	2.656
NDFIP1	3	0.9701	0.97027	0.999709	18278	0	-2.0083	0.0022612	0.0022882	0.824811	45	1	-2.0083	2.64566
FRG2	3	0.8646	0.86492	0.999709	16224	1	-2.7193	0.0023675	0.002402	0.824811	46	1	-2.7193	2.62571
LAMTOR3	3	0.35141	0.50575	0.999709	9460	1	-4.1019	0.0024207	0.0024612	0.824811	47	1	-4.1019	2.61606
TCF20	3	0.98411	0.98427	0.999709	18564	0	-3.283	0.0024738	0.0025105	0.824811	48	1	-3.283	2.60664
SYNPO	3	0.033743	0.083842	0.957159	1629	1	-3.6828	0.002527	0.0025624	0.824811	49	1	-3.6828	2.59739
PCMTD1	3	0.79176	0.80561	0.999709	15080	1	-4.0254	0.0025801	0.0026169	0.824811	50	1	-4.0254	2.58836
OR1A1	3	0.80016	0.81155	0.999709	15198	1	-3.676	0.0026333	0.0026673	0.824811	51	1	-3.676	2.5795
KRT28	3	0.99242	0.99253	0.999709	18734	0	-3.2196	0.0026864	0.002715	0.824811	52	1	-3.2196	2.57083
ELL	3	0.25597	0.40711	0.999709	7605	2	-4.5527	0.0027927	0.0028272	0.824811	53	1	-4.5527	2.55398
CDKL1	3	0.91178	0.91189	0.999709	17120	0	-3.9376	0.0027927	0.0028272	0.824811	54	1	-3.9376	2.55398
GATA6	3	0.99999	0.99999	1	18884	0	-1.3789	0.002899	0.0029399	0.824811	55	1	-1.3789	2.53775
CUL4B	3	0.067862	0.15757	0.991569	2972	2	-4.519	0.0030053	0.0030479	0.824811	56	1	-4.519	2.52211
WBP4	3	0.84386	0.84617	0.999709	15871	1	-1.1508	0.0030584	0.0031019	0.824811	57	1	-1.1508	2.51451
SMARCA2	3	0.99133	0.99143	0.999709	18712	0	-3.4139	0.0031116	0.003147	0.824811	58	1	-3.4139	2.50702
ANKRD13A	3	0.24777	0.39846	0.999709	7444	1	-3.5802	0.0031647	0.0032036	0.824811	59	1	-3.5802	2.49967
KRTAP4-2	3	0.6747	0.73426	0.999709	13745	1	-3.6542	0.003271	0.0032985	0.824811	60	0	-3.6542	2.48532
ARVCF	2	0.21886	0.34225	0.999709	6864	1	-2.6265	0.0033516	0.0033525	0.824811	61	0	-2.6265	2.47475
HYDIN	3	0.29462	0.44724	0.999709	8390	2	-4.4705	0.0033772	0.0034049	0.824811	62	0	-4.4705	2.47144
HUS1	3	0.59452	0.69505	0.999709	13034	1	-4.0185	0.0034303	0.0034526	0.824811	63	0	-4.0185	2.46467
RAD21	3	0.88838	0.88847	0.999709	16660	0	-3.7833	0.0034835	0.0035119	0.824811	64	0	-3.7833	2.45798
GATA4	3	0.85478	0.85581	0.999709	16054	1	-2.5012	0.0035366	0.0035753	0.824811	65	0	-2.5012	2.45141
SIK3	3	0.65209	0.72264	0.999709	13519	1	-2.4241	0.0035897	0.0036267	0.824811	66	0	-2.4241	2.44494
ZNF786	3	0.87227	0.87242	0.999709	16365	1	-4.1053	0.0036428	0.0036838	0.824811	67	0	-4.1053	2.43856
CPO	3	0.95789	0.95815	0.999709	18043	0	-3.5854	0.0036959	0.0037326	0.824811	68	0	-3.5854	2.43228
CDH5	3	0.99909	0.9991	1	18860	0	-2.0275	0.003749	0.0037845	0.824811	69	0	-2.0275	2.42608
ZNF17	3	0.99988	0.99988	1	18878	0	-2.2183	0.0038021	0.0038333	0.824811	70	0	-2.2183	2.41998
OR4D9	3	0.51926	0.66264	0.999709	12392	1	-3.5906	0.0038553	0.0038825	0.824811	71	0	-3.5906	2.41394
CAPN13	3	0.97718	0.97736	0.999709	18428	0	-3.3798	0.0039084	0.0039323	0.824811	72	0	-3.3798	2.408
UPF1	3	0.40376	0.55892	0.999709	10415	1	-4.066	0.0039615	0.0039879	0.824811	73	0	-4.066	2.40214
MOB3A	3	0.099555	0.21996	0.995571	4119	1	-2.8083	0.0040411	0.0040734	0.824811	74	0	-2.8083	2.3935
TGM3	3	0.23524	0.38529	0.999709	7180	1	-3.9376	0.0040411	0.0040734	0.824811	75	0	-3.9376	2.3935
OLA1	3	0.95097	0.95123	0.999709	17905	0	-3.3914	0.0041208	0.0041499	0.824811	76	0	-3.3914	2.38502
GSC2	3	0.22606	0.37557	0.999709	7010	2	-4.423	0.0041739	0.0041971	0.824811	77	0	-4.423	2.37946
OR1J4	3	0.25368	0.4047	0.999709	7555	1	-4.2137	0.004227	0.0042485	0.824811	78	0	-4.2137	2.37397
HES7	3	0.9186	0.91868	0.999709	17275	0	-4.0032	0.00428	0.0043177	0.824811	79	0	-4.0032	2.36856
MARK1	3	0.90358	0.90363	0.999709	16960	0	-2.8342	0.0043331	0.0043706	0.824811	80	0	-2.8342	2.3632
DUSP10	3	0.76654	0.78844	0.999709	14756	1	-2.8424	0.0043862	0.0044231	0.824811	81	0	-2.8424	2.35791
TDG	3	0.73819	0.77049	0.999709	14451	1	-3.9215	0.0044393	0.0044823	0.824811	82	0	-3.9215	2.35269
SAMD12	3	0.51859	0.66237	0.999709	12386	1	-3.5496	0.0044924	0.00453	0.824811	83	0	-3.5496	2.34752
IRF1	3	0.24617	0.39675	0.999709	7411	2	-4.5681	0.0045455	0.0045856	0.824811	84	0	-4.5681	2.34242
DUS4L	3	0.45358	0.60872	0.999709	11376	1	-2.5639	0.0045986	0.0046454	0.824811	85	0	-2.5639	2.33737
CENPO	3	0.18354	0.33045	0.999709	6150	2	-4.5604	0.0046516	0.0046826	0.824811	86	0	-4.5604	2.3324
FDPS	3	0.69579	0.74572	0.999709	13970	1	-3.6156	0.0047047	0.0047298	0.824811	87	0	-3.6156	2.32747
CCDC82	3	0.98787	0.98803	0.999709	18642	0	-3.3678	0.0047578	0.0047885	0.824811	88	0	-3.3678	2.32259
SLC9A1	3	0.96788	0.96806	0.999709	18231	0	-3.6641	0.0048109	0.0048477	0.824811	89	0	-3.6641	2.31777
PPP1R14D	3	0.70839	0.75283	0.999709	14119	1	-3.818	0.004864	0.0049002	0.824811	90	0	-3.818	2.31301
IFNB1	3	0.77997	0.79736	0.999709	14925	1	-3.3854	0.004917	0.0049578	0.824811	91	0	-3.3854	2.3083
CASP2	3	0.78365	0.79989	0.999709	14974	1	-3.7296	0.0049701	0.0050124	0.824811	92	0	-3.7296	2.30363
PCBP1	2	0.69735	0.69947	0.999709	13989	1	-2.4328	0.0050341	0.0050706	0.824811	93	0	-2.4328	2.29808
HIST1H2BL	2	0.48194	0.53013	0.999709	11901	1	-2.6014	0.0050341	0.0050706	0.824811	94	0	-2.6014	2.29808
TRABD2A	2	0.95408	0.95398	0.999709	17966	0	-2.0116	0.0050341	0.0050706	0.824811	95	0	-2.0116	2.29808
TUBD1	2	0.91303	0.91283	0.999709	17153	0	-2.141	0.0050341	0.0050706	0.824811	96	0	-2.141	2.29808
OR1L4	3	0.99085	0.99097	0.999709	18704	0	-2.6632	0.0050762	0.0051324	0.824811	97	0	-2.6632	2.29446
ITGAM	3	0.27128	0.42301	0.999709	7915	1	-0.62842	0.0051293	0.0051838	0.824811	98	0	-0.62842	2.28994
ACAT2	3	0.99821	0.99825	1	18847	0	-2.8511	0.0051823	0.0052368	0.824811	99	0	-2.8511	2.28548
KCNQ1	3	0.65658	0.72493	0.999709	13563	1	-3.6201	0.0052354	0.0052855	0.824811	100	0	-3.6201	2.28105
ACSL3	3	0.96616	0.96636	0.999709	18200	0	-3.4479	0.0052885	0.0053437	0.824811	101	0	-3.4479	2.27667
PLEKHN1	3	0.94934	0.94956	0.999709	17866	0	-3.1801	0.0053415	0.0054003	0.824811	102	0	-3.1801	2.27234
ESYT2	3	0.18973	0.33711	0.999709	6274	2	-4.6573	0.0053946	0.0054517	0.824811	103	0	-4.6573	2.26804
ADAM10	3	0.29586	0.44858	0.999709	8414	2	-4.4948	0.0054476	0.0054963	0.824811	104	0	-4.4948	2.26379
TTC21B	3	0.45021	0.60531	0.999709	11304	2	-4.2838	0.0055007	0.0055419	0.824811	105	0	-4.2838	2.25958
TSPYL6	3	0.58948	0.6927	0.999709	12989	1	-3.6972	0.0055537	0.0055896	0.824811	106	0	-3.6972	2.25542
RAI14	3	0.091787	0.20513	0.995571	3834	1	-2.2546	0.0056068	0.0056525	0.824811	107	0	-2.2546	2.25128
PSMD1	3	0.44238	0.59764	0.999709	11144	2	-4.2932	0.0056598	0.005706	0.824811	108	0	-4.2932	2.2472
TMEM141	3	0.52324	0.66425	0.999709	12433	1	-4.2008	0.0057129	0.0057637	0.824811	109	0	-4.2008	2.24314
NSMF	3	0.13896	0.28224	0.999709	5297	2	-4.2806	0.0057659	0.0058234	0.824811	110	0	-4.2806	2.23913
SNTG1	3	0.54011	0.67131	0.999709	12570	1	-4.0946	0.0058189	0.0058848	0.824811	111	0	-4.0946	2.23516
TMEM74	3	0.42677	0.58207	0.999709	10866	2	-4.3147	0.005872	0.0059319	0.824811	112	0	-4.3147	2.23121
DHRS4L1	3	0.90502	0.90511	0.999709	16983	0	-3.7384	0.005925	0.005987	0.824811	113	0	-3.7384	2.22731
RAG1	3	0.26179	0.41319	0.999709	7723	2	-4.5426	0.005978	0.0060394	0.824811	114	0	-4.5426	2.22344
ITGA4	3	0.90805	0.90814	0.999709	17044	0	-3.873	0.0060311	0.0060908	0.824811	115	0	-3.873	2.2196
CST1	3	0.70404	0.75039	0.999709	14065	1	-1.8989	0.0060841	0.0061432	0.824811	116	0	-1.8989	2.2158
TCHH	3	0.95817	0.95842	0.999709	18049	0	-3.1532	0.0061371	0.0062046	0.824811	117	0	-3.1532	2.21204
TRIM34	3	0.61799	0.70596	0.999709	13234	1	-3.5392	0.0075417	0.0075929	0.824811	118	0	-3.5392	2.12253
PPIC	3	0.98096	0.9811	0.999709	18499	0	-2.9876	0.0075417	0.0075929	0.824811	119	0	-2.9876	2.12253
OR4A47	3	0.49458	0.6495	0.999709	12148	2	-4.2235	0.0075417	0.0075929	0.824811	120	0	-4.2235	2.12253
BCL2L14	3	0.94305	0.94326	0.999709	17745	0	-1.9155	0.0075417	0.0075929	0.824811	121	0	-1.9155	2.12253
PIP5KL1	3	0.0080448	0.021773	0.895146	456	2	-5.2872	0.0075417	0.0075929	0.824811	122	0	-5.2872	2.12253
TNNI3K	3	0.9499	0.95012	0.999709	17876	0	-2.9088	0.0075417	0.0075929	0.824811	123	0	-2.9088	2.12253
ZG16	3	0.21993	0.36915	0.999709	6880	2	-4.6061	0.0075417	0.0075929	0.824811	124	0	-4.6061	2.12253
LYZL4	3	0.80559	0.81545	0.999709	15282	1	-2.7909	0.0075417	0.0075929	0.824811	125	0	-2.7909	2.12253
RELA	3	0.18892	0.33622	0.999709	6257	1	-3.4811	0.0075417	0.0075929	0.824811	126	0	-3.4811	2.12253
TMEM184A	3	0.01943	0.050165	0.925947	985	2	-5.1559	0.0075417	0.0075929	0.824811	127	0	-5.1559	2.12253
CAPZB	3	0.82011	0.82663	0.999709	15487	1	-3.4589	0.0075417	0.0075929	0.824811	128	0	-3.4589	2.12253
CLK4	3	0.062415	0.1464	0.990171	2761	1	-4.1706	0.0075417	0.0075929	0.824811	129	0	-4.1706	2.12253
ZNF250	3	0.11336	0.24584	0.995571	4600	1	-4.0695	0.0075417	0.0075929	0.824811	130	0	-4.0695	2.12253
OR5W2	3	0.36272	0.51739	0.999709	9675	1	-3.1998	0.0075417	0.0075929	0.824811	131	0	-3.1998	2.12253
MTCH2	3	0.4561	0.61131	0.999709	11430	1	-3.8728	0.0075417	0.0075929	0.824811	132	0	-3.8728	2.12253
IQCE	3	0.61315	0.70367	0.999709	13190	1	-4.1433	0.0075417	0.0075929	0.824811	133	0	-4.1433	2.12253
IRX3	3	0.88887	0.88894	0.999709	16673	0	-1.5101	0.0075417	0.0075929	0.824811	134	0	-1.5101	2.12253
SNTG2	3	0.034133	0.084726	0.957159	1647	2	-4.287	0.0075417	0.0075929	0.824811	135	0	-4.287	2.12253
SDC4	3	0.21156	0.36038	0.999709	6716	1	-3.5903	0.0075417	0.0075929	0.824811	136	0	-3.5903	2.12253
ABI3BP	3	0.56443	0.68157	0.999709	12759	1	-4.0071	0.0075417	0.0075929	0.824811	137	0	-4.0071	2.12253
GJB6	3	0.75592	0.78157	0.999709	14637	1	-4.1298	0.0075417	0.0075929	0.824811	138	0	-4.1298	2.12253
MATN4	3	0.64624	0.71974	0.999709	13475	1	-3.7699	0.0075417	0.0075929	0.824811	139	0	-3.7699	2.12253
RBFOX3	3	0.12746	0.26959	0.999709	5044	2	-4.7749	0.0075417	0.0075929	0.824811	140	0	-4.7749	2.12253
PCDHGB1	3	0.27814	0.43018	0.999709	8045	2	-4.3476	0.0075417	0.0075929	0.824811	141	0	-4.3476	2.12253
RAB11FIP4	3	0.38758	0.54256	0.999709	10139	1	-3.6545	0.0075417	0.0075929	0.824811	142	0	-3.6545	2.12253
TIMM9	3	0.89547	0.89557	0.999709	16796	0	-4.0625	0.0075417	0.0075929	0.824811	143	0	-4.0625	2.12253
RIMS4	3	0.92471	0.92481	0.999709	17391	0	-2.0822	0.0075417	0.0075929	0.824811	144	0	-2.0822	2.12253
SPP1	3	0.80755	0.81691	0.999709	15301	1	-2.9283	0.0075417	0.0075929	0.824811	145	0	-2.9283	2.12253
ATOH8	3	0.16746	0.31304	0.999709	5826	2	-4.6977	0.0075417	0.0075929	0.824811	146	0	-4.6977	2.12253
CALN1	3	0.092411	0.20632	0.995571	3854	2	-4.4786	0.0075417	0.0075929	0.824811	147	0	-4.4786	2.12253
PNLIP	3	0.94235	0.94251	0.999709	17731	0	-3.3627	0.0075417	0.0075929	0.824811	148	0	-3.3627	2.12253
SPHAR	3	0.79525	0.80808	0.999709	15129	1	-3.1667	0.0075417	0.0075929	0.824811	149	0	-3.1667	2.12253
KRTAP6-2	3	0.84386	0.84617	0.999709	15868	1	-2.8342	0.0075417	0.0075929	0.824811	150	0	-2.8342	2.12253
IL17RD	3	0.012645	0.033393	0.925947	664	2	-4.2463	0.0075417	0.0075929	0.824811	151	0	-4.2463	2.12253
LFNG	3	0.53935	0.67102	0.999709	12562	1	-3.4364	0.0075417	0.0075929	0.824811	152	0	-3.4364	2.12253
ZNF735	3	0.98473	0.9849	0.999709	18573	0	-2.8842	0.0075417	0.0075929	0.824811	153	0	-2.8842	2.12253
SLC43A1	3	0.9535	0.95382	0.999709	17955	0	-3.308	0.0075417	0.0075929	0.824811	154	0	-3.308	2.12253
IDH1	3	0.39633	0.55142	0.999709	10292	1	-4.1775	0.0075417	0.0075929	0.824811	155	0	-4.1775	2.12253
FGF14	3	0.88736	0.88747	0.999709	16637	0	-3.8005	0.0075417	0.0075929	0.824811	156	0	-3.8005	2.12253
LIN52	3	0.25891	0.4102	0.999709	7657	2	-4.5476	0.0075417	0.0075929	0.824811	157	0	-4.5476	2.12253
NDUFV2	3	0.15408	0.29859	0.999709	5571	2	-4.7232	0.0075417	0.0075929	0.824811	158	0	-4.7232	2.12253
CHRNG	3	0.99242	0.99253	0.999709	18735	0	-3.2391	0.0075417	0.0075929	0.824811	159	0	-3.2391	2.12253
PDIA2	3	0.94761	0.94785	0.999709	17828	0	-2.9487	0.0075417	0.0075929	0.824811	160	0	-2.9487	2.12253
HSD11B2	3	0.92362	0.92372	0.999709	17366	0	-3.4421	0.0075417	0.0075929	0.824811	161	0	-3.4421	2.12253
PTCD2	3	0.19534	0.3431	0.999709	6393	1	-2.9563	0.0075417	0.0075929	0.824811	162	0	-2.9563	2.12253
RBPMS	3	0.22104	0.37029	0.999709	6903	1	-2.5433	0.0075417	0.0075929	0.824811	163	0	-2.5433	2.12253
KRTAP10-4	3	0.84002	0.84287	0.999709	15810	1	-1.8989	0.0075417	0.0075929	0.824811	164	0	-1.8989	2.12253
SIGLEC10	3	0.42112	0.57649	0.999709	10751	1	-3.5602	0.0075417	0.0075929	0.824811	165	0	-3.5602	2.12253
MTRNR2L8	2	0.78928	0.78863	0.999709	15055	0	-2.3791	0.0083596	0.0083473	0.824811	166	0	-2.3791	2.07781
SAV1	3	0.87499	0.87513	0.999709	16414	1	-4.0697	0.0089449	0.0089371	0.824811	167	0	-4.0697	2.04842
REPIN1	3	0.94657	0.94677	0.999709	17807	0	-1.9472	0.0089978	0.0089932	0.824811	168	0	-1.9472	2.04586
ZBED2	3	0.36337	0.51804	0.999709	9683	2	-4.4003	0.0090507	0.0090514	0.824811	169	0	-4.4003	2.04332
FOXL2	3	0.90876	0.90885	0.999709	17064	0	-2.933	0.0091036	0.0090939	0.824811	170	0	-2.933	2.04079
KNOP1	3	0.14554	0.28937	0.999709	5414	1	-2.568	0.0091566	0.0091416	0.824811	171	0	-2.568	2.03827
SLC30A8	3	0.84235	0.84486	0.999709	15850	1	-4.1844	0.0092095	0.0091964	0.824811	172	0	-4.1844	2.03576
ACVR2B	3	0.98981	0.98994	0.999709	18677	0	-3.4811	0.0092624	0.009258	0.824811	173	0	-3.4811	2.03328
RNASE3	3	0.77825	0.79622	0.999709	14907	1	-2.9088	0.0093418	0.0093434	0.824811	174	0	-2.9088	2.02957
ERBB3	3	0.62133	0.70753	0.999709	13254	1	-2.8083	0.0093418	0.0093434	0.824811	175	0	-2.8083	2.02957
LALBA	3	0.79121	0.80523	0.999709	15075	1	-2.4579	0.0094211	0.0094189	0.824811	176	0	-2.4579	2.0259
SMIM2	3	0.90386	0.90391	0.999709	16968	0	-2.9039	0.009474	0.0094656	0.824811	177	0	-2.9039	2.02347
BRD8	3	0.99313	0.99327	0.999709	18753	0	-3.326	0.0095269	0.0095175	0.824811	178	0	-3.326	2.02105
UCN3	3	0.085726	0.19337	0.995571	3620	2	-4.2822	0.0095799	0.0095579	0.824811	179	0	-4.2822	2.01864
PPP2R2C	3	0.89407	0.89415	0.999709	16780	0	-3.9533	0.0096328	0.0096134	0.824811	180	0	-3.9533	2.01625
MRPL49	2	0.28592	0.40485	0.999709	8214	1	-2.9351	0.011556	0.011585	0.824811	181	0	-2.9351	1.93719
ZNF451	3	0.44002	0.59527	0.999709	11103	1	-3.3503	0.012513	0.012491	0.824811	182	0	-3.3503	1.90264
TMEM231	3	0.99324	0.99339	0.999709	18759	0	-2.7556	0.012513	0.012491	0.824811	183	0	-2.7556	1.90264
BUD23	3	0.070526	0.16296	0.994765	3061	2	-4.7115	0.012513	0.012491	0.824811	184	0	-4.7115	1.90264
NLRP1	3	0.80675	0.81631	0.999709	15291	1	-3.5955	0.012513	0.012491	0.824811	185	0	-3.5955	1.90264
NUDT15	3	0.94166	0.9418	0.999709	17722	0	-3.5955	0.012513	0.012491	0.824811	186	0	-3.5955	1.90264
COX7A2	3	0.3094	0.46275	0.999709	8674	2	-4.476	0.012513	0.012491	0.824811	187	0	-4.476	1.90264
KRTAP3-2	3	0.95817	0.95842	0.999709	18046	0	-3.356	0.012513	0.012491	0.824811	188	0	-3.356	1.90264
HSP90B1	3	0.83827	0.84137	0.999709	15785	1	-2.9406	0.012513	0.012491	0.824811	189	0	-2.9406	1.90264
KCNIP4	3	0.9107	0.91081	0.999709	17101	0	-4.0767	0.012513	0.012491	0.824811	190	0	-4.0767	1.90264
CLSTN2	3	0.89165	0.89171	0.999709	16732	0	-3.0836	0.012513	0.012491	0.824811	191	0	-3.0836	1.90264
RHBDL3	3	0.98727	0.98741	0.999709	18635	0	-2.9876	0.012513	0.012491	0.824811	192	0	-2.9876	1.90264
MTNR1A	3	0.94632	0.94652	0.999709	17801	0	-3.885	0.012513	0.012491	0.824811	193	0	-3.885	1.90264
TTI1	3	0.69093	0.74301	0.999709	13909	1	-3.9844	0.012513	0.012491	0.824811	194	0	-3.9844	1.90264
HLF	3	0.23504	0.38508	0.999709	7173	2	-4.5858	0.012513	0.012491	0.824811	195	0	-4.5858	1.90264
TEFM	3	0.14447	0.28817	0.999709	5394	2	-3.7099	0.012513	0.012491	0.824811	196	0	-3.7099	1.90264
SEMA3F	3	0.30573	0.45893	0.999709	8603	2	-4.4812	0.012513	0.012491	0.824811	197	0	-4.4812	1.90264
NPM3	3	0.16044	0.30538	0.999709	5694	1	-3.7475	0.012513	0.012491	0.824811	198	0	-3.7475	1.90264
TBKBP1	3	0.1124	0.24407	0.995571	4572	1	-2.066	0.012513	0.012491	0.824811	199	0	-2.066	1.90264
PPIAL4C	3	0.34525	0.49952	0.999709	9358	1	-3.7018	0.012513	0.012491	0.824811	200	0	-3.7018	1.90264
RNF8	3	0.44646	0.60162	0.999709	11229	2	-4.2872	0.012513	0.012491	0.824811	201	0	-4.2872	1.90264
MARK2	3	0.93802	0.93825	0.999709	17652	0	-3.283	0.012513	0.012491	0.824811	202	0	-3.283	1.90264
RPAIN	3	0.99214	0.99225	0.999709	18729	0	-2.8926	0.012513	0.012491	0.824811	203	0	-2.8926	1.90264
CYYR1	3	0.77648	0.79505	0.999709	14877	1	-2.3756	0.012513	0.012491	0.824811	204	0	-2.3756	1.90264
PABPC5	3	0.23504	0.38508	0.999709	7177	2	-4.5858	0.012513	0.012491	0.824811	205	0	-4.5858	1.90264
FAM177B	3	0.09627	0.21374	0.995571	3994	2	-4.8482	0.012513	0.012491	0.824811	206	0	-4.8482	1.90264
PSME2	3	0.094748	0.21084	0.995571	3939	2	-4.8524	0.012513	0.012491	0.824811	207	0	-4.8524	1.90264
CD3G	3	0.94982	0.95003	0.999709	17873	0	-1.0647	0.012513	0.012491	0.824811	208	0	-1.0647	1.90264
SYT7	3	0.26224	0.41363	0.999709	7727	2	-4.262	0.012513	0.012491	0.824811	209	0	-4.262	1.90264
GHR	3	0.53543	0.66935	0.999709	12535	1	-3.9416	0.012513	0.012491	0.824811	210	0	-3.9416	1.90264
SLC12A5	3	0.89936	0.89952	0.999709	16878	0	-2.3671	0.012513	0.012491	0.824811	211	0	-2.3671	1.90264
KRTAP9-1	3	0.23847	0.38865	0.999709	7245	2	-4.2806	0.012513	0.012491	0.824811	212	0	-4.2806	1.90264
MGARP	3	0.92572	0.92582	0.999709	17417	0	-4.0442	0.012513	0.012491	0.824811	213	0	-4.0442	1.90264
SCP2	3	0.61001	0.70219	0.999709	13164	1	-3.1532	0.012513	0.012491	0.824811	214	0	-3.1532	1.90264
LDLRAD3	3	0.55994	0.67967	0.999709	12726	1	-1.0647	0.012513	0.012491	0.824811	215	0	-1.0647	1.90264
STK10	3	0.63047	0.71198	0.999709	13324	1	-3.3621	0.012513	0.012491	0.824811	216	0	-3.3621	1.90264
CTBP2	3	0.10864	0.23711	0.995571	4439	2	-4.8165	0.012513	0.012491	0.824811	217	0	-4.8165	1.90264
HIST1H3B	3	0.89165	0.89171	0.999709	16722	0	-3.035	0.012513	0.012491	0.824811	218	0	-3.035	1.90264
LPCAT2	3	0.94101	0.94117	0.999709	17706	0	-3.2645	0.012513	0.012491	0.824811	219	0	-3.2645	1.90264
TSC22D3	3	0.88887	0.88894	0.999709	16668	0	-2.1382	0.012513	0.012491	0.824811	220	0	-2.1382	1.90264
YBX1	3	0.52127	0.66344	0.999709	12410	1	-3.7338	0.012513	0.012491	0.824811	221	0	-3.7338	1.90264
NELFE	3	0.32415	0.4779	0.999709	8965	1	-3.8688	0.012513	0.012491	0.824811	222	0	-3.8688	1.90264
TMED9	3	0.72898	0.76488	0.999709	14340	1	-1.8989	0.012513	0.012491	0.824811	223	0	-1.8989	1.90264
RNF165	3	0.98556	0.98569	0.999709	18596	0	-3.5652	0.012513	0.012491	0.824811	224	0	-3.5652	1.90264
LMNB2	3	0.13773	0.28087	0.999709	5273	2	-4.7548	0.012513	0.012491	0.824811	225	0	-4.7548	1.90264
ANP32B	3	0.87551	0.87564	0.999709	16422	0	-2.5122	0.012513	0.012491	0.824811	226	0	-2.5122	1.90264
TMIGD3	3	0.74041	0.77183	0.999709	14479	1	-3.2065	0.012513	0.012491	0.824811	227	0	-3.2065	1.90264
TGM6	3	0.34441	0.49866	0.999709	9347	2	-4.4261	0.012513	0.012491	0.824811	228	0	-4.4261	1.90264
PSMA2	3	0.44087	0.5961	0.999709	11125	1	-3.8852	0.012513	0.012491	0.824811	229	0	-3.8852	1.90264
CTAGE9	3	0.57037	0.68418	0.999709	12811	1	-3.3264	0.012513	0.012491	0.824811	230	0	-3.3264	1.90264
RMI2	3	0.17274	0.31873	0.999709	5931	2	-4.6881	0.012513	0.012491	0.824811	231	0	-4.6881	1.90264
CCDC50	3	0.11066	0.24084	0.995571	4507	1	-3.7742	0.012513	0.012491	0.824811	232	0	-3.7742	1.90264
TRMT2A	3	0.73819	0.77049	0.999709	14446	1	-4.1121	0.012513	0.012491	0.824811	233	0	-4.1121	1.90264
OR2W3	3	0.91749	0.91761	0.999709	17250	0	-3.5074	0.012513	0.012491	0.824811	234	0	-3.5074	1.90264
TLDC1	3	0.99948	0.99948	1	18868	0	-2.4241	0.012513	0.012491	0.824811	235	0	-2.4241	1.90264
CRYBG2	3	0.044471	0.10796	0.962571	2098	2	-5.0148	0.012513	0.012491	0.824811	236	0	-5.0148	1.90264
RAB8B	3	0.67772	0.73586	0.999709	13776	1	-3.5648	0.012513	0.012491	0.824811	237	0	-3.5648	1.90264
PPP6C	3	0.73044	0.76577	0.999709	14359	1	-3.6641	0.012513	0.012491	0.824811	238	0	-3.6641	1.90264
SP140	3	0.92572	0.92582	0.999709	17415	0	-3.3564	0.012513	0.012491	0.824811	239	0	-3.3564	1.90264
FZD9	3	0.71554	0.75692	0.999709	14198	1	-3.5652	0.012513	0.012491	0.824811	240	0	-3.5652	1.90264
TMEM45A	3	0.69505	0.7453	0.999709	13959	1	-2.8677	0.012513	0.012491	0.824811	241	0	-2.8677	1.90264
XRCC2	3	0.91401	0.91409	0.999709	17179	0	-1.8989	0.012513	0.012491	0.824811	242	0	-1.8989	1.90264
CHRNA7	3	0.13166	0.27422	0.999709	5130	1	-3.2457	0.012513	0.012491	0.824811	243	0	-3.2457	1.90264
KLHDC7A	3	0.51237	0.65979	0.999709	12340	1	-2.9406	0.012513	0.012491	0.824811	244	0	-2.9406	1.90264
BOD1L2	3	0.93745	0.93765	0.999709	17641	0	-3.761	0.012513	0.012491	0.824811	245	0	-3.761	1.90264
GDAP1	3	0.85478	0.85581	0.999709	16061	1	-3.835	0.012513	0.012491	0.824811	246	0	-3.835	1.90264
ZNF595	3	0.059019	0.13929	0.985912	2642	2	-4.5706	0.012513	0.012491	0.824811	247	0	-4.5706	1.90264
AMOTL1	3	0.73592	0.7691	0.999709	14424	1	-4.0182	0.012513	0.012491	0.824811	248	0	-4.0182	1.90264
PCYOX1	3	0.44501	0.60021	0.999709	11201	1	-3.9294	0.012513	0.012491	0.824811	249	0	-3.9294	1.90264
CPN2	3	0.81183	0.82015	0.999709	15358	1	-4.204	0.012513	0.012491	0.824811	250	0	-4.204	1.90264
IL20	3	0.79342	0.80676	0.999709	15108	1	-1.3992	0.012513	0.012491	0.824811	251	0	-1.3992	1.90264
IFT46	3	0.95246	0.95274	0.999709	17936	0	-2.5639	0.012513	0.012491	0.824811	252	0	-2.5639	1.90264
STEAP4	3	0.87551	0.87564	0.999709	16421	0	-3.283	0.012513	0.012491	0.824811	253	0	-3.283	1.90264
SKOR1	3	0.43681	0.59207	0.999709	11050	2	-4.2302	0.012513	0.012491	0.824811	254	0	-4.2302	1.90264
ATP7A	3	0.80559	0.81545	0.999709	15281	1	-1.9155	0.012513	0.012491	0.824811	255	0	-1.9155	1.90264
AHCYL1	3	0.13237	0.27504	0.999709	5139	2	-4.7659	0.012513	0.012491	0.824811	256	0	-4.7659	1.90264
CD38	3	0.034497	0.085559	0.957159	1664	1	-2.1382	0.012513	0.012491	0.824811	257	0	-2.1382	1.90264
CDCA7	3	0.24405	0.39456	0.999709	7357	2	-4.217	0.012513	0.012491	0.824811	258	0	-4.217	1.90264
CEP63	3	0.98703	0.98717	0.999709	18631	0	-1.3527	0.012513	0.012491	0.824811	259	0	-1.3527	1.90264
POU2F1	3	0.47025	0.6254	0.999709	11689	2	-4.2557	0.012513	0.012491	0.824811	260	0	-4.2557	1.90264
USH2A	3	0.99467	0.99477	0.999852	18787	0	-3.1998	0.012513	0.012491	0.824811	261	0	-3.1998	1.90264
SPG20	3	0.16746	0.31304	0.999709	5827	2	-4.6977	0.012513	0.012491	0.824811	262	0	-4.6977	1.90264
TBC1D23	3	0.97608	0.97626	0.999709	18405	0	-2.4241	0.012513	0.012491	0.824811	263	0	-2.4241	1.90264
CHST1	3	0.19624	0.34406	0.999709	6410	1	-3.388	0.012513	0.012491	0.824811	264	0	-3.388	1.90264
OR2L5	3	0.98703	0.98717	0.999709	18632	0	-2.6913	0.012513	0.012491	0.824811	265	0	-2.6913	1.90264
TMEM38B	3	0.056801	0.13464	0.983827	2564	2	-4.9674	0.012513	0.012491	0.824811	266	0	-4.9674	1.90264
FLT1	3	0.86214	0.86256	0.999709	16182	1	-2.8083	0.012513	0.012491	0.824811	267	0	-2.8083	1.90264
MLXIP	3	0.76654	0.78844	0.999709	14755	1	-4.0404	0.012513	0.012491	0.824811	268	0	-4.0404	1.90264
PCDHB8	3	0.57628	0.68681	0.999709	12874	1	-4.1331	0.012513	0.012491	0.824811	269	0	-4.1331	1.90264
CACNG6	3	0.91102	0.91112	0.999709	17106	0	-1.5892	0.012513	0.012491	0.824811	270	0	-1.5892	1.90264
ADAMTS8	3	0.20703	0.35561	0.999709	6622	2	-4.476	0.012513	0.012491	0.824811	271	0	-4.476	1.90264
FAM209A	3	0.4956	0.65055	0.999709	12172	1	-4.0295	0.012513	0.012491	0.824811	272	0	-4.0295	1.90264
SOX6	3	0.11498	0.24881	0.995571	4656	1	-3.8931	0.012513	0.012491	0.824811	273	0	-3.8931	1.90264
POLE	3	0.43512	0.59035	0.999709	11025	1	-2.7104	0.012513	0.012491	0.824811	274	0	-2.7104	1.90264
RSPO1	3	0.98609	0.98624	0.999709	18608	0	-3.2457	0.012513	0.012491	0.824811	275	0	-3.2457	1.90264
DEFB4A	3	0.89808	0.8982	0.999709	16853	0	-4.0144	0.012513	0.012491	0.824811	276	0	-4.0144	1.90264
OR52B2	3	0.99615	0.99622	0.999916	18813	0	-1.8988	0.012513	0.012491	0.824811	277	0	-1.8988	1.90264
HIST1H3E	3	0.19989	0.34796	0.999709	6479	2	-4.5188	0.012513	0.012491	0.824811	278	0	-4.5188	1.90264
F8	3	0.58948	0.6927	0.999709	12987	1	-3.0543	0.012513	0.012491	0.824811	279	0	-3.0543	1.90264
ASAP1	3	0.083398	0.18888	0.995571	3539	1	-3.5392	0.012513	0.012491	0.824811	280	0	-3.5392	1.90264
TCF15	3	0.9272	0.92732	0.999709	17436	0	-2.9563	0.012513	0.012491	0.824811	281	0	-2.9563	1.90264
CDC42EP2	3	0.67323	0.73347	0.999709	13726	1	-3.0762	0.012513	0.012491	0.824811	282	0	-3.0762	1.90264
CLDN14	3	0.37803	0.53284	0.999709	9962	2	-4.2932	0.012513	0.012491	0.824811	283	0	-4.2932	1.90264
GMNN	3	0.75329	0.77987	0.999709	14614	1	-1.727	0.012513	0.012491	0.824811	284	0	-1.727	1.90264
IL18RAP	3	0.35256	0.50696	0.999709	9479	2	-4.4148	0.012513	0.012491	0.824811	285	0	-4.4148	1.90264
PABPC3	3	0.81495	0.82253	0.999709	15409	1	-3.3678	0.012513	0.012491	0.824811	286	0	-3.3678	1.90264
ZCCHC10	2	0.73387	0.73363	0.999709	14405	1	-2.5967	0.012791	0.012799	0.842222	287	0	-2.5967	1.8931
MYRF	2	0.75931	0.75865	0.999709	14679	0	-2.6015	0.01436	0.014339	0.904653	288	0	-2.6015	1.84285
KRTCAP2	3	0.15441	0.29891	0.999709	5575	1	-3.5546	0.015388	0.015352	0.904653	289	0	-3.5546	1.81282
TGS1	3	0.54188	0.67204	0.999709	12589	1	-3.7521	0.015441	0.015403	0.904653	290	0	-3.7521	1.81132
TECTA	3	0.078694	0.1795	0.995571	3351	2	-4.8977	0.015493	0.015457	0.904653	291	0	-4.8977	1.80986
SIGMAR1	3	0.075266	0.17255	0.995571	3226	2	-4.908	0.015546	0.015499	0.904653	292	0	-4.908	1.80838
INSL5	3	0.65498	0.72412	0.999709	13556	1	-2.1921	0.015599	0.015558	0.904653	293	0	-2.1921	1.8069
SLC26A5	3	0.021304	0.054796	0.925947	1089	2	-4.9941	0.015651	0.015612	0.904653	294	0	-4.9941	1.80546
RPS21	3	0.56493	0.68181	0.999709	12764	1	-4.0442	0.01573	0.01569	0.904653	295	0	-4.0442	1.80327
RASA4	3	0.49637	0.65127	0.999709	12186	2	-4.2204	0.01573	0.01569	0.904653	296	0	-4.2204	1.80327
CARD18	3	0.3648	0.51949	0.999709	9717	2	-4.3975	0.015809	0.015769	0.904653	297	0	-4.3975	1.8011
AKTIP	3	0.70335	0.75	0.999709	14059	1	-3.881	0.015862	0.015816	0.904653	298	0	-3.881	1.79964
TOMM6	3	0.89495	0.89505	0.999709	16791	0	-1.8989	0.015915	0.015871	0.904653	299	0	-1.8989	1.79819
C10orf120	3	0.75273	0.77952	0.999709	14611	1	-3.5753	0.015967	0.01592	0.904653	300	0	-3.5753	1.79678
AKR1C2	3	0.64569	0.71949	0.999709	13473	1	-2.2317	0.01602	0.015968	0.904653	301	0	-2.2317	1.79534
SGCZ	3	0.96638	0.9666	0.999709	18204	0	-3.3738	0.016073	0.01603	0.904653	302	0	-3.3738	1.7939
SERP1	3	0.9834	0.98355	0.999709	18546	0	-2.9797	0.016125	0.016089	0.904653	303	0	-2.9797	1.7925
TAF1B	3	0.87453	0.87466	0.999709	16398	1	-3.9096	0.016204	0.016184	0.904653	304	0	-3.9096	1.79038
CYB5R3	3	0.17981	0.32639	0.999709	6073	1	-3.6831	0.016204	0.016184	0.904653	305	0	-3.6831	1.79038
DOC2A	3	0.98673	0.98688	0.999709	18623	0	-2.634	0.016283	0.01626	0.904653	306	0	-2.634	1.78827
IMPG1	3	0.53168	0.66775	0.999709	12500	1	-4.0035	0.016336	0.016317	0.904653	307	0	-4.0035	1.78685
PEX7	3	0.45203	0.60715	0.999709	11348	1	-4.1974	0.016389	0.016372	0.904653	308	0	-4.1974	1.78545
OR5B12	3	0.42491	0.58022	0.999709	10819	1	-3.4532	0.016441	0.016423	0.904653	309	0	-3.4532	1.78407
DOT1L	3	0.0096092	0.025762	0.916236	524	2	-5.2655	0.016494	0.016489	0.904653	310	0	-5.2655	1.78267
SURF2	3	0.99062	0.99073	0.999709	18700	0	-1.6258	0.016547	0.016541	0.904653	311	0	-1.6258	1.78128
DAXX	3	0.10974	0.23918	0.995571	4473	2	-4.4454	0.016599	0.016601	0.904653	312	0	-4.4454	1.77992
PSMB10	3	0.78365	0.79989	0.999709	14973	1	-2.8842	0.016652	0.016641	0.904653	313	0	-2.8842	1.77853
ISYNA1	3	0.90502	0.90511	0.999709	16988	0	-3.187	0.016705	0.016692	0.904653	314	0	-3.187	1.77715
CRYBG1	2	0.2511	0.38443	0.999709	7500	1	-3.0303	0.016737	0.016641	0.904653	315	0	-3.0303	1.77632
TMEM167A	2	0.46687	0.51983	0.999709	11621	1	-2.8705	0.016737	0.016641	0.904653	316	0	-2.8705	1.77632
ATP5L	2	0.84005	0.83975	0.999709	15813	0	-2.534	0.016737	0.016641	0.904653	317	0	-2.534	1.77632
PRAMEF19	2	0.50886	0.54908	0.999709	12318	1	-2.8391	0.016737	0.016641	0.904653	318	0	-2.8391	1.77632
NOL7	2	0.82329	0.82287	0.999709	15538	0	-2.5562	0.016737	0.016641	0.904653	319	0	-2.5562	1.77632
BCL2L15	3	0.87317	0.87331	0.999709	16372	1	-2.8083	0.016757	0.016745	0.904653	320	0	-2.8083	1.7758
CDK17	3	0.18011	0.32674	0.999709	6078	1	-3.1466	0.01681	0.016791	0.904653	321	0	-3.1466	1.77443
GNG4	3	0.8849	0.88498	0.999709	16593	0	-3.9996	0.016863	0.016844	0.904653	322	0	-3.9996	1.77307
PBDC1	3	0.057542	0.1362	0.983827	2593	2	-4.9653	0.016915	0.016891	0.904653	323	0	-4.9653	1.77173
SLC35C2	3	0.24179	0.39214	0.999709	7302	1	-3.6782	0.016968	0.016946	0.904653	324	0	-3.6782	1.77037
GLYAT	3	0.93009	0.93022	0.999709	17497	0	-3.2958	0.017021	0.016997	0.904653	325	0	-3.2958	1.76901
LCTL	3	0.14485	0.28858	0.999709	5402	1	-4.2105	0.017073	0.017039	0.904653	326	0	-4.2105	1.76769
OR51A2	3	0.94245	0.94261	0.999709	17732	0	-3.6782	0.017126	0.01709	0.904653	327	0	-3.6782	1.76634
P4HTM	3	0.40191	0.55706	0.999709	10386	2	-4.3476	0.017178	0.017148	0.904653	328	0	-4.3476	1.76503
USHBP1	3	0.69367	0.74454	0.999709	13931	1	-3.9804	0.017231	0.017197	0.904653	329	0	-3.9804	1.76369
FLVCR2	3	0.45103	0.60615	0.999709	11326	2	-4.281	0.017336	0.017294	0.904653	330	0	-4.281	1.76105
TSTA3	3	0.9389	0.93913	0.999709	17661	0	-3.818	0.017389	0.017348	0.904653	331	0	-3.818	1.75973
TRPC6	3	0.57485	0.68616	0.999709	12855	1	-4.0806	0.017442	0.01741	0.904653	332	0	-4.0806	1.7584
RPIA	3	0.13536	0.27834	0.999709	5212	2	-4.7594	0.017547	0.017514	0.904653	333	0	-4.7594	1.7558
SPINK6	3	0.67563	0.73476	0.999709	13755	1	-1.0647	0.017599	0.017572	0.904653	334	0	-1.0647	1.75451
POTEC	3	0.13527	0.27823	0.999709	5209	1	-3.6641	0.017652	0.017625	0.904653	335	0	-3.6641	1.75321
ARHGAP35	3	0.10602	0.23223	0.995571	4337	1	-3.2898	0.017705	0.017684	0.904653	336	0	-3.2898	1.7519
ZNF705G	1	0.98101	0.98107	0.999709	18502	0	-1.6706	0.01899	0.018961	0.904653	337	0	-1.6706	1.72148
PIP	3	0.4918	0.64669	0.999709	12095	2	-4.2269	0.019125	0.019117	0.904653	338	0	-4.2269	1.7184
KIAA1524	3	0.99995	0.99995	1	18882	0	-1.8989	0.019125	0.019117	0.904653	339	0	-1.8989	1.7184
FUBP1	3	0.37817	0.53298	0.999709	9975	2	-4.38	0.019125	0.019117	0.904653	340	0	-4.38	1.7184
SCARF2	3	0.45021	0.60531	0.999709	11309	2	-4.2838	0.019125	0.019117	0.904653	341	0	-4.2838	1.7184
UCKL1	3	0.9904	0.99052	0.999709	18693	0	-3.4421	0.019125	0.019117	0.904653	342	0	-3.4421	1.7184
ACVR1B	3	0.67772	0.73586	0.999709	13777	1	-4.1906	0.019125	0.019117	0.904653	343	0	-4.1906	1.7184
DEFB103A	3	0.091238	0.20408	0.995571	3812	1	-1.3992	0.019125	0.019117	0.904653	344	0	-1.3992	1.7184
TPCN2	3	0.41838	0.57369	0.999709	10703	2	-4.3266	0.019125	0.019117	0.904653	345	0	-4.3266	1.7184
STAT6	3	0.0723	0.16659	0.995571	3122	1	-3.7018	0.019125	0.019117	0.904653	346	0	-3.7018	1.7184
PAXBP1	3	0.22426	0.37363	0.999709	6967	1	-2.8429	0.019125	0.019117	0.904653	347	0	-2.8429	1.7184
ARR3	3	0.039015	0.095791	0.958624	1858	2	-4.8437	0.019125	0.019117	0.904653	348	0	-4.8437	1.7184
SCD	3	0.71061	0.75409	0.999709	14143	1	-2.6048	0.019125	0.019117	0.904653	349	0	-2.6048	1.7184
TBC1D2	3	0.16792	0.31351	0.999709	5838	2	-4.6975	0.019125	0.019117	0.904653	350	0	-4.6975	1.7184
ZNF79	3	0.92861	0.92876	0.999709	17471	0	-3.2518	0.019125	0.019117	0.904653	351	0	-3.2518	1.7184
HPCA	3	0.16901	0.31469	0.999709	5854	2	-4.4091	0.019125	0.019117	0.904653	352	0	-4.4091	1.7184
ZBTB25	3	0.95532	0.95564	0.999709	17993	0	-1.8326	0.019125	0.019117	0.904653	353	0	-1.8326	1.7184
GDF5	3	0.95426	0.95459	0.999709	17973	0	-1.3992	0.019125	0.019117	0.904653	354	0	-1.3992	1.7184
IRF6	3	0.37749	0.53229	0.999709	9953	1	-3.818	0.019125	0.019117	0.904653	355	0	-3.818	1.7184
SLITRK1	3	0.97093	0.97108	0.999709	18303	0	-3.6687	0.019125	0.019117	0.904653	356	0	-3.6687	1.7184
MMP23B	3	0.40215	0.55731	0.999709	10390	1	-2.4241	0.019125	0.019117	0.904653	357	0	-2.4241	1.7184
PSME4	3	0.08523	0.1924	0.995571	3601	2	-4.2202	0.019125	0.019117	0.904653	358	0	-4.2202	1.7184
FPGT-TNNI3K	3	0.96811	0.96831	0.999709	18235	0	-3.5701	0.019125	0.019117	0.904653	359	0	-3.5701	1.7184
SPANXN1	3	0.23029	0.37998	0.999709	7094	2	-4.5911	0.019125	0.019117	0.904653	360	0	-4.5911	1.7184
FOXRED2	3	0.41435	0.56964	0.999709	10615	1	-2.5744	0.019125	0.019117	0.904653	361	0	-2.5744	1.7184
ROBO3	3	0.57559	0.68648	0.999709	12871	1	-2.2694	0.019125	0.019117	0.904653	362	0	-2.2694	1.7184
COL4A2	3	0.023664	0.060461	0.925947	1215	2	-4.6379	0.019125	0.019117	0.904653	363	0	-4.6379	1.7184
VKORC1L1	3	0.65192	0.72256	0.999709	13517	1	-3.308	0.019125	0.019117	0.904653	364	0	-3.308	1.7184
PSMD10	3	0.50049	0.65501	0.999709	12257	1	-4.0107	0.019125	0.019117	0.904653	365	0	-4.0107	1.7184
RBX1	3	0.85071	0.8521	0.999709	15985	1	-2.901	0.019125	0.019117	0.904653	366	0	-2.901	1.7184
FCHSD1	3	0.35154	0.5059	0.999709	9462	2	-4.4173	0.019125	0.019117	0.904653	367	0	-4.4173	1.7184
PSMA1	3	0.24617	0.39675	0.999709	7413	2	-4.5681	0.019125	0.019117	0.904653	368	0	-4.5681	1.7184
CCL22	3	0.39658	0.55167	0.999709	10296	1	-2.0822	0.019125	0.019117	0.904653	369	0	-2.0822	1.7184
LRR1	3	0.49962	0.65445	0.999709	12244	1	-2.096	0.019125	0.019117	0.904653	370	0	-2.096	1.7184
SH3YL1	3	0.93449	0.93467	0.999709	17590	0	-3.1801	0.019125	0.019117	0.904653	371	0	-3.1801	1.7184
ARID4B	3	0.42677	0.58207	0.999709	10868	2	-4.3147	0.019125	0.019117	0.904653	372	0	-4.3147	1.7184
GSN	3	0.22958	0.37926	0.999709	7081	2	-4.5934	0.019125	0.019117	0.904653	373	0	-4.5934	1.7184
NANOGNB	3	0.99049	0.99062	0.999709	18695	0	-2.3311	0.019125	0.019117	0.904653	374	0	-2.3311	1.7184
KLHL40	3	0.0099501	0.026641	0.916236	540	1	-3.9881	0.019125	0.019117	0.904653	375	0	-3.9881	1.7184
RBM34	3	0.97913	0.97929	0.999709	18466	0	-3.4751	0.019125	0.019117	0.904653	376	0	-3.4751	1.7184
ERLIN2	3	0.017155	0.044613	0.925947	890	2	-5.1777	0.019125	0.019117	0.904653	377	0	-5.1777	1.7184
TMCC2	3	0.81297	0.82101	0.999709	15377	1	-3.6006	0.019125	0.019117	0.904653	378	0	-3.6006	1.7184
GPR180	3	0.8646	0.86492	0.999709	16227	1	-3.4642	0.019125	0.019117	0.904653	379	0	-3.4642	1.7184
OR4L1	3	0.99992	0.99992	1	18881	0	-2.0019	0.019125	0.019117	0.904653	380	0	-2.0019	1.7184
HLA-F	3	0.71607	0.75721	0.999709	14201	1	-3.7875	0.019125	0.019117	0.904653	381	0	-3.7875	1.7184
MMAB	3	0.36543	0.52013	0.999709	9731	1	-2.8511	0.019125	0.019117	0.904653	382	0	-2.8511	1.7184
OR14A16	3	0.99028	0.9904	0.999709	18688	0	-2.9797	0.019125	0.019117	0.904653	383	0	-2.9797	1.7184
ZNF280A	3	0.99062	0.99073	0.999709	18698	0	-2.5945	0.019125	0.019117	0.904653	384	0	-2.5945	1.7184
CCDC168	3	0.58224	0.68943	0.999709	12923	1	-3.5339	0.019125	0.019117	0.904653	385	0	-3.5339	1.7184
AGL	3	0.74186	0.77271	0.999709	14496	1	-2.6724	0.019125	0.019117	0.904653	386	0	-2.6724	1.7184
CRYGD	3	0.68274	0.73856	0.999709	13829	1	-3.3442	0.019125	0.019117	0.904653	387	0	-3.3442	1.7184
ANLN	3	0.8428	0.84525	0.999709	15853	1	-3.711	0.019125	0.019117	0.904653	388	0	-3.711	1.7184
ARHGAP1	2	0.91422	0.91401	0.999709	17184	0	-2.4386	0.020043	0.019974	0.904653	389	0	-2.4386	1.69804
CIB4	3	0.18808	0.3353	0.999709	6238	2	-4.6598	0.020543	0.020593	0.904653	390	0	-4.6598	1.68734
NCKAP1L	3	0.74682	0.77582	0.999709	14541	1	-2.7734	0.020596	0.020642	0.904653	391	0	-2.7734	1.68622
RPS27	3	0.20326	0.35162	0.999709	6542	2	-4.5135	0.020648	0.020688	0.904653	392	0	-4.5135	1.68512
CD274	3	0.97229	0.97247	0.999709	18332	0	-3.6592	0.020701	0.020747	0.904653	393	0	-3.6592	1.68401
BPIFC	3	0.33368	0.48761	0.999709	9141	1	-3.4313	0.020753	0.020799	0.904653	394	0	-3.4313	1.68292
CELSR3	3	0.40378	0.55894	0.999709	10420	2	-4.3448	0.020806	0.020858	0.904653	395	0	-4.3448	1.68181
C6orf203	3	0.34135	0.49552	0.999709	9288	2	-3.8362	0.020858	0.020908	0.904653	396	0	-3.8362	1.68073
JAM3	3	0.97633	0.97652	0.999709	18409	0	-3.1934	0.020911	0.020966	0.904653	397	0	-3.1934	1.67963
ACOXL	3	0.28972	0.44218	0.999709	8283	2	-4.5029	0.020963	0.021024	0.904653	398	0	-4.5029	1.67855
RAB3B	3	0.8474	0.84923	0.999709	15926	1	-1.5926	0.021016	0.021071	0.904653	399	0	-1.5926	1.67745
KLHL41	3	0.37694	0.53178	0.999709	9938	1	-3.5701	0.021068	0.021129	0.904653	400	0	-3.5701	1.67638
PAQR4	3	0.11655	0.25158	0.995571	4711	1	-3.8268	0.021121	0.021191	0.904653	401	0	-3.8268	1.67529
KRT10	2	0.39103	0.46944	0.999709	10195	1	-3.0192	0.021325	0.021288	0.904653	402	0	-3.0192	1.67111
MNS1	3	0.56777	0.68306	0.999709	12793	1	-3.5704	0.021462	0.021523	0.904653	403	0	-3.5704	1.66833
MDFI	3	0.74834	0.7768	0.999709	14563	1	-3.356	0.021462	0.021523	0.904653	404	0	-3.356	1.66833
ZBTB7C	3	0.39574	0.5508	0.999709	10273	1	-3.5652	0.021462	0.021523	0.904653	405	0	-3.5652	1.66833
ALDH3B2	3	0.40748	0.56271	0.999709	10480	2	-4.2331	0.021462	0.021523	0.904653	406	0	-4.2331	1.66833
AMTN	3	0.17272	0.31871	0.999709	5928	1	-3.9573	0.021462	0.021523	0.904653	407	0	-3.9573	1.66833
PRR5L	3	0.71422	0.75616	0.999709	14180	1	-2.8342	0.021462	0.021523	0.904653	408	0	-2.8342	1.66833
IFT57	3	0.049425	0.11878	0.975293	2287	2	-4.2235	0.021462	0.021523	0.904653	409	0	-4.2235	1.66833
NMD3	3	0.61799	0.70596	0.999709	13231	1	-2.8429	0.021462	0.021523	0.904653	410	0	-2.8429	1.66833
APOM	3	0.18834	0.33559	0.999709	6241	1	-3.6399	0.021462	0.021523	0.904653	411	0	-3.6399	1.66833
ABTB2	3	0.71345	0.75572	0.999709	14175	1	-2.8088	0.021462	0.021523	0.904653	412	0	-2.8088	1.66833
C8orf74	3	0.92471	0.92481	0.999709	17390	0	-3.1801	0.021462	0.021523	0.904653	413	0	-3.1801	1.66833
CD40LG	3	0.97563	0.97584	0.999709	18392	0	-3.5392	0.021803	0.02186	0.904653	414	0	-3.5392	1.66148
C16orf78	3	0.12746	0.26959	0.999709	5041	2	-4.7749	0.021855	0.021908	0.904653	415	0	-4.7749	1.66045
TEF	3	0.49637	0.65127	0.999709	12193	2	-4.2204	0.021908	0.02197	0.904653	416	0	-4.2204	1.6594
BHMT2	3	0.10059	0.22199	0.995571	4159	2	-4.8375	0.02196	0.022037	0.904653	417	0	-4.8375	1.65837
PTPN23	3	0.34741	0.50166	0.999709	9399	1	-3.6302	0.022013	0.022085	0.904653	418	0	-3.6302	1.65732
ARHGAP24	3	0.10092	0.22261	0.995571	4165	2	-4.8356	0.022065	0.022132	0.904653	419	0	-4.8356	1.6563
SLC26A4	3	0.98173	0.98189	0.999709	18515	0	-3.3202	0.022118	0.022173	0.904653	420	0	-3.3202	1.65525
KIR2DL3	2	0.35087	0.44414	0.999709	9452	1	-3.0732	0.022852	0.022884	0.904653	421	0	-3.0732	1.64108
WDR83OS	2	0.5986	0.61618	0.999709	13070	1	-2.9183	0.023624	0.023657	0.904653	422	0	-2.9183	1.62665
STRADB	2	0.72532	0.72542	0.999709	14310	1	-2.8351	0.024044	0.024066	0.904653	423	0	-2.8351	1.61899
C20orf78	3	0.71098	0.75431	0.999709	14146	1	-3.835	0.025	0.025053	0.904653	424	0	-3.835	1.60206
LMO1	3	0.91574	0.9158	0.999709	17225	0	-3.025	0.025	0.025053	0.904653	425	0	-3.025	1.60206
BCL6	3	0.794	0.80718	0.999709	15114	1	-3.3384	0.025	0.025053	0.904653	426	0	-3.3384	1.60206
ENPP1	3	0.17751	0.32392	0.999709	6028	2	-4.6788	0.025	0.025053	0.904653	427	0	-4.6788	1.60206
OR2T6	3	0.20423	0.35266	0.999709	6565	2	-4.633	0.025	0.025053	0.904653	428	0	-4.633	1.60206
WASF3	3	0.091613	0.20479	0.995571	3819	1	-3.4479	0.025	0.025053	0.904653	429	0	-3.4479	1.60206
CDKN1A	3	0.45817	0.61337	0.999709	11464	1	-2.0822	0.025	0.025053	0.904653	430	0	-2.0822	1.60206
COPS7A	3	0.13614	0.27917	0.999709	5226	1	-3.6003	0.025	0.025053	0.904653	431	0	-3.6003	1.60206
LCN1	3	0.58859	0.69228	0.999709	12977	1	-3.9454	0.025	0.025053	0.904653	432	0	-3.9454	1.60206
PKD1L1	3	0.25834	0.4096	0.999709	7644	2	-4.5477	0.025	0.025053	0.904653	433	0	-4.5477	1.60206
LRRC70	3	0.33319	0.48711	0.999709	9130	1	-4.1123	0.025	0.025053	0.904653	434	0	-4.1123	1.60206
AMBN	3	0.11066	0.24084	0.995571	4504	1	-2.901	0.025	0.025053	0.904653	435	0	-2.901	1.60206
JPT2	3	0.87921	0.87928	0.999709	16489	0	-3.7478	0.025	0.025053	0.904653	436	0	-3.7478	1.60206
TMF1	3	0.73592	0.7691	0.999709	14428	1	-2.7999	0.025	0.025053	0.904653	437	0	-2.7999	1.60206
KRTAP1-4	3	0.71192	0.75485	0.999709	14155	1	-4.1226	0.025	0.025053	0.904653	438	0	-4.1226	1.60206
KRIT1	3	0.12904	0.27133	0.999709	5077	2	-4.7725	0.025	0.025053	0.904653	439	0	-4.7725	1.60206
MEI4	3	0.70989	0.7537	0.999709	14139	1	-2.2317	0.025	0.025053	0.904653	440	0	-2.2317	1.60206
RSBN1L	3	0.48536	0.64034	0.999709	11964	1	-3.6252	0.025	0.025053	0.904653	441	0	-3.6252	1.60206
HSH2D	3	0.37721	0.53206	0.999709	9951	2	-4.3802	0.025	0.025053	0.904653	442	0	-4.3802	1.60206
FAM98B	3	0.88736	0.88747	0.999709	16643	0	-3.3322	0.025	0.025053	0.904653	443	0	-3.3322	1.60206
SH3BP1	3	0.26491	0.41636	0.999709	7790	2	-4.5374	0.025	0.025053	0.904653	444	0	-4.5374	1.60206
ZNF790	3	0.56943	0.68378	0.999709	12805	1	-3.5599	0.025	0.025053	0.904653	445	0	-3.5599	1.60206
C16orf52	3	0.49587	0.6508	0.999709	12177	1	-2.1201	0.025	0.025053	0.904653	446	0	-2.1201	1.60206
MPP3	3	0.87551	0.87564	0.999709	16419	0	-2.9166	0.025	0.025053	0.904653	447	0	-2.9166	1.60206
LRIG1	3	0.46171	0.61693	0.999709	11530	1	-3.7158	0.025	0.025053	0.904653	448	0	-3.7158	1.60206
ZNF584	3	0.36809	0.52282	0.999709	9782	2	-4.3919	0.025	0.025053	0.904653	449	0	-4.3919	1.60206
ONECUT1	3	0.82421	0.82987	0.999709	15544	1	-3.4364	0.025	0.025053	0.904653	450	0	-3.4364	1.60206
PNLIPRP1	3	0.88054	0.88059	0.999709	16505	0	-4.0841	0.025	0.025053	0.904653	451	0	-4.0841	1.60206
CUEDC2	3	0.67394	0.73385	0.999709	13732	1	-2.2075	0.025	0.025053	0.904653	452	0	-2.2075	1.60206
TRIM50	3	0.0049383	0.013626	0.880817	279	2	-5.3583	0.025	0.025053	0.904653	453	0	-5.3583	1.60206
NDUFS4	3	0.39195	0.54699	0.999709	10214	1	-3.7387	0.025	0.025053	0.904653	454	0	-3.7387	1.60206
CYFIP1	3	0.43004	0.58535	0.999709	10935	2	-4.3088	0.025	0.025053	0.904653	455	0	-4.3088	1.60206
GNG11	3	0.98151	0.98167	0.999709	18511	0	-3.4197	0.025	0.025053	0.904653	456	0	-3.4197	1.60206
OR1L8	3	0.19939	0.3474	0.999709	6463	1	-3.3017	0.025	0.025053	0.904653	457	0	-3.3017	1.60206
AQP12B	3	0.71481	0.75648	0.999709	14189	1	-4.1708	0.025	0.025053	0.904653	458	0	-4.1708	1.60206
RP1L1	3	0.3075	0.46078	0.999709	8636	2	-4.4786	0.025	0.025053	0.904653	459	0	-4.4786	1.60206
RPUSD1	3	0.20844	0.35708	0.999709	6648	1	-3.3503	0.025	0.025053	0.904653	460	0	-3.3503	1.60206
ATP5L2	3	0.41276	0.568	0.999709	10595	1	-4.0218	0.025	0.025053	0.904653	461	0	-4.0218	1.60206
PPFIA4	3	0.45181	0.60695	0.999709	11345	2	-4.2808	0.025	0.025053	0.904653	462	0	-4.2808	1.60206
MS4A3	3	0.17806	0.32449	0.999709	6036	2	-4.6786	0.025	0.025053	0.904653	463	0	-4.6786	1.60206
FXYD7	3	0.14103	0.28447	0.999709	5333	2	-4.748	0.025	0.025053	0.904653	464	0	-4.748	1.60206
TMEM243	3	0.53252	0.66808	0.999709	12510	1	-3.877	0.025	0.025053	0.904653	465	0	-3.877	1.60206
SYNJ2BP-COX16	3	0.60593	0.70031	0.999709	13130	1	-3.6396	0.025	0.025053	0.904653	466	0	-3.6396	1.60206
CSRP2	3	0.39682	0.55193	0.999709	10309	2	-4.3536	0.025	0.025053	0.904653	467	0	-4.3536	1.60206
MED1	3	0.78104	0.7981	0.999709	14941	1	-3.3682	0.025	0.025053	0.904653	468	0	-3.3682	1.60206
KIF25	3	0.97913	0.97929	0.999709	18467	0	-2.8088	0.025	0.025053	0.904653	469	0	-2.8088	1.60206
YY2	3	0.98307	0.98322	0.999709	18541	0	-3.3264	0.025	0.025053	0.904653	470	0	-3.3264	1.60206
OR2M5	3	0.48178	0.63681	0.999709	11891	1	-3.0173	0.025	0.025053	0.904653	471	0	-3.0173	1.60206
HIST1H1B	3	0.27761	0.42961	0.999709	8042	2	-4.519	0.025	0.025053	0.904653	472	0	-4.519	1.60206
OR10V1	3	0.91928	0.91936	0.999709	17289	0	-3.8307	0.025	0.025053	0.904653	473	0	-3.8307	1.60206
ITPR3	3	0.10392	0.22829	0.995571	4263	1	-4.1775	0.025	0.025053	0.904653	474	0	-4.1775	1.60206
OR52W1	3	0.43586	0.59108	0.999709	11037	2	-4.3025	0.025	0.025053	0.904653	475	0	-4.3025	1.60206
CDH12	3	0.52971	0.66691	0.999709	12488	1	-3.7018	0.025	0.025053	0.904653	476	0	-3.7018	1.60206
RNF219	3	0.98285	0.983	0.999709	18537	0	-3.4479	0.025	0.025053	0.904653	477	0	-3.4479	1.60206
POU6F1	3	0.11213	0.24355	0.995571	4566	2	-4.4232	0.025	0.025053	0.904653	478	0	-4.4232	1.60206
ROR1	3	0.094855	0.21105	0.995571	3953	1	-2.6913	0.025	0.025053	0.904653	479	0	-2.6913	1.60206
PTPRB	3	0.33989	0.49403	0.999709	9263	2	-4.4319	0.025	0.025053	0.904653	480	0	-4.4319	1.60206
AGXT	3	0.96011	0.96038	0.999709	18086	0	-2.4579	0.025	0.025053	0.904653	481	0	-2.4579	1.60206
THEG	3	0.27814	0.43018	0.999709	8048	2	-4.4146	0.025	0.025053	0.904653	482	0	-4.4146	1.60206
ZMYND11	3	0.92757	0.9277	0.999709	17451	0	-1.0647	0.025	0.025053	0.904653	483	0	-1.0647	1.60206
HMGB4	3	0.43432	0.58957	0.999709	11008	1	-3.1462	0.025	0.025053	0.904653	484	0	-3.1462	1.60206
UBE2T	3	0.30003	0.45297	0.999709	8502	2	-4.4894	0.025	0.025053	0.904653	485	0	-4.4894	1.60206
GGT7	3	0.92928	0.92941	0.999709	17485	0	-3.3143	0.025	0.025053	0.904653	486	0	-3.3143	1.60206
OR5M1	3	0.97913	0.97929	0.999709	18469	0	-2.4241	0.025	0.025053	0.904653	487	0	-2.4241	1.60206
ATM	3	0.89407	0.89415	0.999709	16770	0	-3.7745	0.025	0.025053	0.904653	488	0	-3.7745	1.60206
AGR2	3	0.23746	0.38759	0.999709	7231	2	-4.5809	0.025	0.025053	0.904653	489	0	-4.5809	1.60206
MED31	3	0.57097	0.68443	0.999709	12818	1	-2.5639	0.025	0.025053	0.904653	490	0	-2.5639	1.60206
UBE2C	3	0.89808	0.8982	0.999709	16850	0	-3.9297	0.025	0.025053	0.904653	491	0	-3.9297	1.60206
GDF9	3	0.73331	0.76749	0.999709	14392	1	-3.22	0.025	0.025053	0.904653	492	0	-3.22	1.60206
RTKN	3	0.92298	0.92311	0.999709	17352	0	-2.9248	0.025	0.025053	0.904653	493	0	-2.9248	1.60206
VSIG2	3	0.96597	0.96614	0.999709	18197	0	-1.5101	0.025	0.025053	0.904653	494	0	-1.5101	1.60206
TM9SF3	3	0.81225	0.82048	0.999709	15366	1	-4.1055	0.025	0.025053	0.904653	495	0	-4.1055	1.60206
BNIP2	3	0.74118	0.7723	0.999709	14493	1	-3.3798	0.025	0.025053	0.904653	496	0	-3.3798	1.60206
ZNF800	3	0.45887	0.61407	0.999709	11473	2	-4.2714	0.025	0.025053	0.904653	497	0	-4.2714	1.60206
TRAPPC8	3	0.46734	0.62247	0.999709	11635	2	-4.259	0.025	0.025053	0.904653	498	0	-4.259	1.60206
PDPN	3	0.99305	0.99318	0.999709	18751	0	-3.2329	0.025	0.025053	0.904653	499	0	-3.2329	1.60206
PDE6H	3	0.021999	0.056477	0.925947	1122	2	-5.137	0.025	0.025053	0.904653	500	0	-5.137	1.60206
GAL3ST2	3	0.83766	0.84086	0.999709	15772	1	-3.8973	0.025	0.025053	0.904653	501	0	-3.8973	1.60206
NAV3	3	0.89547	0.89557	0.999709	16797	0	-4.0912	0.025	0.025053	0.904653	502	0	-4.0912	1.60206
CTPS2	3	0.22761	0.37721	0.999709	7037	2	-4.5959	0.025	0.025053	0.904653	503	0	-4.5959	1.60206
STK11IP	3	0.065395	0.15254	0.990171	2878	1	-4.1367	0.025	0.025053	0.904653	504	0	-4.1367	1.60206
C9orf85	3	0.85542	0.8564	0.999709	16070	1	-3.6545	0.025	0.025053	0.904653	505	0	-3.6545	1.60206
CSDE1	3	0.34285	0.49702	0.999709	9312	2	-4.4288	0.025	0.025053	0.904653	506	0	-4.4288	1.60206
MTA3	3	0.75069	0.77827	0.999709	14593	1	-3.5906	0.025	0.025053	0.904653	507	0	-3.5906	1.60206
MBD3	3	0.62324	0.70852	0.999709	13273	1	-2.9088	0.025	0.025053	0.904653	508	0	-2.9088	1.60206
DNALI1	3	0.77054	0.79111	0.999709	14803	1	-3.0974	0.025	0.025053	0.904653	509	0	-3.0974	1.60206
IFNL1	3	0.21744	0.36656	0.999709	6838	2	-4.6109	0.025	0.025053	0.904653	510	0	-4.6109	1.60206
GALNTL6	3	0.48536	0.64034	0.999709	11963	1	-3.8052	0.025	0.025053	0.904653	511	0	-3.8052	1.60206
GFRA1	3	0.50321	0.65613	0.999709	12276	1	-2.4241	0.025	0.025053	0.904653	512	0	-2.4241	1.60206
CCND2	3	0.92649	0.92662	0.999709	17430	0	-2.9166	0.025	0.025053	0.904653	513	0	-2.9166	1.60206
AGK	3	0.95956	0.95981	0.999709	18073	0	-3.6831	0.025	0.025053	0.904653	514	0	-3.6831	1.60206
YRDC	3	0.79525	0.80808	0.999709	15131	1	-2.2861	0.025	0.025053	0.904653	515	0	-2.2861	1.60206
SLC45A2	3	0.41202	0.56725	0.999709	10578	1	-3.5022	0.025	0.025053	0.904653	516	0	-3.5022	1.60206
GTF3C6	3	0.99482	0.99494	0.999852	18789	0	-2.6913	0.025	0.025053	0.904653	517	0	-2.6913	1.60206
ADAM32	3	0.97608	0.97626	0.999709	18407	0	-2.7648	0.025	0.025053	0.904653	518	0	-2.7648	1.60206
ATF4	3	0.96597	0.96614	0.999709	18196	0	-1.9782	0.025	0.025053	0.904653	519	0	-1.9782	1.60206
MRPS31	3	0.9989	0.99893	1	18857	0	-2.4797	0.025	0.025053	0.904653	520	0	-2.4797	1.60206
ACO1	3	0.27266	0.42444	0.999709	7938	1	-3.7521	0.025	0.025053	0.904653	521	0	-3.7521	1.60206
LRRTM1	3	0.79641	0.80889	0.999709	15153	1	-3.734	0.025	0.025053	0.904653	522	0	-3.734	1.60206
ZNF35	3	0.32148	0.47514	0.999709	8917	2	-4.4594	0.025	0.025053	0.904653	523	0	-4.4594	1.60206
NBAS	3	0.14703	0.29098	0.999709	5448	1	-3.9057	0.027877	0.027881	0.927039	524	0	-3.9057	1.55475
RIOK2	3	0.42821	0.58354	0.999709	10895	2	-4.3118	0.027929	0.027938	0.927039	525	0	-4.3118	1.55394
PCDHB14	3	0.54011	0.67131	0.999709	12572	1	-3.9762	0.027981	0.028	0.927039	526	0	-3.9762	1.55314
SMS	3	0.85163	0.85296	0.999709	15997	1	-4.194	0.028033	0.028048	0.927039	527	0	-4.194	1.55233
AICDA	3	0.16523	0.31061	0.999709	5785	2	-4.7022	0.028086	0.028093	0.927039	528	0	-4.7022	1.55151
FAM114A1	3	0.72232	0.76093	0.999709	14276	1	-2.7009	0.028138	0.028144	0.927039	529	0	-2.7009	1.55071
RPL36	3	0.20504	0.35353	0.999709	6578	2	-4.6308	0.02819	0.028196	0.927039	530	0	-4.6308	1.5499
PLXND1	3	0.99991	0.9999	1	18880	0	-1.8989	0.028242	0.028244	0.927039	531	0	-1.8989	1.5491
CTSS	3	0.8849	0.88498	0.999709	16591	0	-2.5122	0.028321	0.028329	0.927039	532	0	-2.5122	1.54789
ZFP14	3	0.028869	0.072718	0.944921	1439	1	-3.9256	0.028321	0.028329	0.927039	533	0	-3.9256	1.54789
OR10J5	3	0.037459	0.092268	0.958624	1786	1	-4.2006	0.028425	0.028445	0.927039	534	0	-4.2006	1.5463
MSI1	3	0.66504	0.72924	0.999709	13648	1	-3.1462	0.028425	0.028445	0.927039	535	0	-3.1462	1.5463
XYLB	3	0.41975	0.57509	0.999709	10720	1	-2.8511	0.028503	0.028523	0.927039	536	0	-2.8511	1.54511
OR52N5	3	0.92168	0.92175	0.999709	17334	0	-3.5074	0.028556	0.028574	0.927039	537	0	-3.5074	1.5443
RAD51AP1	3	0.70335	0.75	0.999709	14055	1	-3.0326	0.028608	0.028627	0.927039	538	0	-3.0326	1.54351
ZNF622	3	0.98439	0.98456	0.999709	18569	0	-2.6632	0.02866	0.028679	0.927039	539	0	-2.6632	1.54272
SLC5A2	3	0.40272	0.5579	0.999709	10402	2	-4.3449	0.028712	0.02874	0.927039	540	0	-4.3449	1.54194
MLLT3	3	0.10374	0.22795	0.995571	4259	1	-3.2133	0.028765	0.028795	0.927039	541	0	-3.2133	1.54114
ANXA5	3	0.4918	0.64669	0.999709	12094	2	-4.2269	0.028817	0.028846	0.927039	542	0	-4.2269	1.54035
ARHGEF38	3	0.37445	0.52928	0.999709	9901	1	-3.9137	0.028869	0.028892	0.927039	543	0	-3.9137	1.53957
GOLGA7	3	0.93575	0.93594	0.999709	17612	0	-3.0543	0.028921	0.02895	0.927039	544	0	-3.0543	1.53879
SLC9A6	3	0.48392	0.6389	0.999709	11933	1	-2.0822	0.028973	0.028995	0.927039	545	0	-2.0822	1.53801
NVL	2	0.87172	0.87152	0.999709	16354	0	-2.6437	0.029018	0.029027	0.927039	546	0	-2.6437	1.53733
PDE5A	3	0.81495	0.82253	0.999709	15401	1	-1.3992	0.029026	0.029046	0.927039	547	0	-1.3992	1.53721
ANKRD34B	3	0.56551	0.68205	0.999709	12768	1	-4.0588	0.02913	0.029151	0.927039	548	0	-4.0588	1.53566
FPR2	3	0.21498	0.36399	0.999709	6785	2	-4.6136	0.029182	0.029202	0.927039	549	0	-4.6136	1.53488
ZNF791	3	0.97304	0.97319	0.999709	18347	0	-2.6822	0.029234	0.029256	0.927039	550	0	-2.6822	1.53411
JAKMIP1	3	0.47391	0.62906	0.999709	11754	1	-2.2183	0.029287	0.029308	0.927039	551	0	-2.2183	1.53333
WEE2	3	0.2913	0.4438	0.999709	8311	1	-2.096	0.029339	0.029364	0.927039	552	0	-2.096	1.53255
PRMT6	3	0.89671	0.89683	0.999709	16825	0	-3.6449	0.029391	0.029427	0.927039	553	0	-3.6449	1.53179
KIF13A	3	0.9998	0.99979	1	18875	0	-1.6226	0.029443	0.029486	0.927039	554	0	-1.6226	1.53102
CD1E	3	0.82529	0.83072	0.999709	15569	1	-2.8342	0.029495	0.029541	0.927039	555	0	-2.8342	1.53025
SH3KBP1	3	0.053948	0.12855	0.979476	2461	1	-1.727	0.029548	0.029593	0.927039	556	0	-1.727	1.52947
MYO1G	3	0.98488	0.98505	0.999709	18579	0	-2.6913	0.0296	0.029651	0.927039	557	0	-2.6913	1.52871
POSTN	3	0.050634	0.12137	0.97609	2327	1	-2.6724	0.029652	0.029699	0.927039	558	0	-2.6724	1.52795
FAT3	3	0.044398	0.1078	0.962571	2097	2	-4.7068	0.029704	0.029753	0.927039	559	0	-4.7068	1.52719
PTPN21	3	0.9186	0.91868	0.999709	17278	0	-3.7202	0.029756	0.02981	0.927039	560	0	-3.7202	1.52643
TMPRSS7	3	0.89808	0.8982	0.999709	16852	0	-3.5518	0.029808	0.029862	0.927039	561	0	-3.5518	1.52567
ALDH3B1	3	0.56469	0.6817	0.999709	12761	1	-3.1934	0.029861	0.029908	0.927039	562	0	-3.1934	1.5249
CUX1	3	0.89032	0.89038	0.999709	16693	0	-3.711	0.029965	0.030015	0.927039	563	0	-3.711	1.52339
FAM71D	3	0.9585	0.95876	0.999709	18055	0	-3.8007	0.030017	0.03006	0.927039	564	0	-3.8007	1.52263
NSD3	3	0.42919	0.5845	0.999709	10922	1	-3.8521	0.030069	0.030116	0.927039	565	0	-3.8521	1.52188
MS4A6A	3	0.6161	0.70503	0.999709	13214	1	-3.7788	0.030174	0.030222	0.927039	566	0	-3.7788	1.52037
BLOC1S2	3	0.1556	0.3002	0.999709	5600	1	-2.8677	0.030226	0.03028	0.927039	567	0	-2.8677	1.51962
GOLGA6D	1	0.96975	0.96991	0.999709	18273	0	-1.8537	0.030252	0.030156	0.927039	568	0	-1.8537	1.51925
ZNF548	3	0.84868	0.85035	0.999709	15948	1	-3.5234	0.030278	0.030328	0.927039	569	0	-3.5234	1.51887
TNNT3	3	0.93802	0.93825	0.999709	17648	0	-3.711	0.031816	0.031855	0.927039	570	0	-3.711	1.49735
SPRR2E	3	0.99226	0.99237	0.999709	18731	0	-3.0618	0.031816	0.031855	0.927039	571	0	-3.0618	1.49735
PCGF1	3	0.37562	0.53044	0.999709	9914	2	-4.383	0.031816	0.031855	0.927039	572	0	-4.383	1.49735
RPAP3	3	0.17477	0.32092	0.999709	5975	2	-4.6835	0.031816	0.031855	0.927039	573	0	-4.6835	1.49735
PEX26	3	0.81225	0.82048	0.999709	15363	1	-2.8762	0.031816	0.031855	0.927039	574	0	-2.8762	1.49735
ALG13	3	0.3391	0.49322	0.999709	9244	2	-4.4344	0.031816	0.031855	0.927039	575	0	-4.4344	1.49735
DCTD	3	0.4459	0.60107	0.999709	11221	2	-4.2898	0.031816	0.031855	0.927039	576	0	-4.2898	1.49735
FER1L6	3	0.98473	0.9849	0.999709	18577	0	-2.2572	0.031816	0.031855	0.927039	577	0	-2.2572	1.49735
NUP160	3	0.45595	0.61116	0.999709	11420	2	-4.2746	0.031816	0.031855	0.927039	578	0	-4.2746	1.49735
ACAP3	3	0.15181	0.29613	0.999709	5533	1	-2.9748	0.031816	0.031855	0.927039	579	0	-2.9748	1.49735
TFEB	3	0.91472	0.9148	0.999709	17194	0	-3.9725	0.031816	0.031855	0.927039	580	0	-3.9725	1.49735
HPR	3	0.81225	0.82048	0.999709	15362	1	-3.1602	0.031816	0.031855	0.927039	581	0	-3.1602	1.49735
PAPD4	3	0.9585	0.95876	0.999709	18054	0	-3.761	0.031816	0.031855	0.927039	582	0	-3.761	1.49735
ABHD2	3	0.74958	0.77758	0.999709	14581	1	-3.818	0.031816	0.031855	0.927039	583	0	-3.818	1.49735
GPR52	3	0.74041	0.77183	0.999709	14486	1	-3.3621	0.031816	0.031855	0.927039	584	0	-3.3621	1.49735
ARRDC1	3	0.41567	0.57098	0.999709	10653	2	-4.259	0.031816	0.031855	0.927039	585	0	-4.259	1.49735
TMC8	3	0.89352	0.89358	0.999709	16764	0	-4.1087	0.031816	0.031855	0.927039	586	0	-4.1087	1.49735
NOS1AP	3	0.78564	0.80128	0.999709	14998	1	-4.147	0.031816	0.031855	0.927039	587	0	-4.147	1.49735
CPB2	3	0.58809	0.69206	0.999709	12973	1	-3.5288	0.031816	0.031855	0.927039	588	0	-3.5288	1.49735
SMU1	3	0.088688	0.19912	0.995571	3722	1	-3.5342	0.031816	0.031855	0.927039	589	0	-3.5342	1.49735
UCP3	3	0.95504	0.95535	0.999709	17987	0	-3.6542	0.031816	0.031855	0.927039	590	0	-3.6542	1.49735
GIMAP6	3	0.70404	0.75039	0.999709	14063	1	-3.1118	0.031816	0.031855	0.927039	591	0	-3.1118	1.49735
GTPBP3	3	0.92757	0.9277	0.999709	17449	0	-3.818	0.031816	0.031855	0.927039	592	0	-3.818	1.49735
FAM86B2	3	0.3803	0.53517	0.999709	10007	1	-3.0618	0.031816	0.031855	0.927039	593	0	-3.0618	1.49735
ACTG2	3	0.1622	0.3073	0.999709	5722	2	-4.7091	0.031816	0.031855	0.927039	594	0	-4.7091	1.49735
OR1J2	3	0.60427	0.69952	0.999709	13113	1	-3.7608	0.031816	0.031855	0.927039	595	0	-3.7608	1.49735
AASDHPPT	3	0.83695	0.84026	0.999709	15759	1	-3.4536	0.031816	0.031855	0.927039	596	0	-3.4536	1.49735
PAX6	3	0.94276	0.94295	0.999709	17738	0	-3.8136	0.031816	0.031855	0.927039	597	0	-3.8136	1.49735
GRP	3	0.93449	0.93467	0.999709	17587	0	-3.1462	0.031816	0.031855	0.927039	598	0	-3.1462	1.49735
BCAS3	3	0.78695	0.80222	0.999709	15016	1	-2.5639	0.031816	0.031855	0.927039	599	0	-2.5639	1.49735
CHST15	3	0.59577	0.69561	0.999709	13045	1	-4.147	0.031816	0.031855	0.927039	600	0	-4.147	1.49735
ACOX3	3	0.57977	0.68833	0.999709	12903	1	-1.5672	0.031816	0.031855	0.927039	601	0	-1.5672	1.49735
THAP5	3	0.82529	0.83072	0.999709	15566	1	-2.6822	0.031816	0.031855	0.927039	602	0	-2.6822	1.49735
EXOC7	3	0.45374	0.60889	0.999709	11378	1	-4.0478	0.031816	0.031855	0.927039	603	0	-4.0478	1.49735
CARMIL2	3	0.59131	0.69354	0.999709	13006	1	-3.7875	0.031816	0.031855	0.927039	604	0	-3.7875	1.49735
UNC5CL	3	0.48189	0.63692	0.999709	11895	2	-4.2399	0.031816	0.031855	0.927039	605	0	-4.2399	1.49735
OCSTAMP	3	0.064555	0.15075	0.990171	2844	1	-2.6048	0.031816	0.031855	0.927039	606	0	-2.6048	1.49735
RAB13	3	0.95321	0.95352	0.999709	17951	0	-3.3795	0.031816	0.031855	0.927039	607	0	-3.3795	1.49735
GLB1L3	3	0.60194	0.69844	0.999709	13096	1	-2.9088	0.031816	0.031855	0.927039	608	0	-2.9088	1.49735
RNASET2	3	0.82689	0.83196	0.999709	15601	1	-4.1874	0.031816	0.031855	0.927039	609	0	-4.1874	1.49735
TMEM189-UBE2V1	3	0.86271	0.86311	0.999709	16188	1	-3.1118	0.031816	0.031855	0.927039	610	0	-3.1118	1.49735
WNT2B	3	0.74379	0.77391	0.999709	14517	1	-3.0618	0.031816	0.031855	0.927039	611	0	-3.0618	1.49735
AP5M1	3	0.49458	0.6495	0.999709	12156	2	-4.2235	0.031816	0.031855	0.927039	612	0	-4.2235	1.49735
NASP	3	0.24159	0.39193	0.999709	7300	1	-2.9797	0.031816	0.031855	0.927039	613	0	-2.9797	1.49735
ORAI1	3	0.96597	0.96614	0.999709	18199	0	-2.7909	0.031816	0.031855	0.927039	614	0	-2.7909	1.49735
CDCP2	3	0.9384	0.93864	0.999709	17655	0	-3.9137	0.031816	0.031855	0.927039	615	0	-3.9137	1.49735
EPS15	3	0.32456	0.47831	0.999709	8967	1	-3.9573	0.031816	0.031855	0.927039	616	0	-3.9573	1.49735
HOXB5	3	0.93603	0.93621	0.999709	17616	0	-3.9176	0.031816	0.031855	0.927039	617	0	-3.9176	1.49735
TMEM26	3	0.18037	0.32702	0.999709	6089	2	-4.6741	0.031816	0.031855	0.927039	618	0	-4.6741	1.49735
OR2M3	3	0.33124	0.48515	0.999709	9093	1	-3.1118	0.031816	0.031855	0.927039	619	0	-3.1118	1.49735
ITIH1	3	0.048988	0.11781	0.970697	2277	1	-3.9454	0.031816	0.031855	0.927039	620	0	-3.9454	1.49735
SPATC1	3	0.82206	0.82817	0.999709	15519	1	-1.8326	0.031816	0.031855	0.927039	621	0	-1.8326	1.49735
RASL10B	3	0.859	0.85964	0.999709	16127	1	-3.4214	0.031816	0.031855	0.927039	622	0	-3.4214	1.49735
BPY2B	3	0.61799	0.70596	0.999709	13233	1	-3.5802	0.031816	0.031855	0.927039	623	0	-3.5802	1.49735
FAM122B	3	0.40447	0.55965	0.999709	10429	2	-4.3446	0.031816	0.031855	0.927039	624	0	-4.3446	1.49735
CDK14	3	0.9997	0.99969	1	18874	0	-1.5101	0.031816	0.031855	0.927039	625	0	-1.5101	1.49735
CATSPER3	3	0.22289	0.37221	0.999709	6939	1	-3.575	0.031816	0.031855	0.927039	626	0	-3.575	1.49735
PRAMEF14	2	0.56176	0.58803	0.999709	12736	1	-3.0446	0.032617	0.032631	0.927039	627	0	-3.0446	1.48656
CDK20	3	0.79726	0.80947	0.999709	15167	1	-3.4536	0.033352	0.033346	0.927039	628	0	-3.4536	1.47688
NEK7	3	0.83092	0.8353	0.999709	15663	1	-2.901	0.033405	0.033393	0.927039	629	0	-2.901	1.47619
SRP9	3	0.93413	0.9343	0.999709	17575	0	-2.6913	0.033457	0.033448	0.927039	630	0	-2.6913	1.47551
GOT2	3	0.80224	0.81302	0.999709	15227	1	-3.8177	0.033535	0.033525	0.927039	631	0	-3.8177	1.4745
SUFU	3	0.88054	0.88059	0.999709	16509	0	-4.0254	0.033535	0.033525	0.927039	632	0	-4.0254	1.4745
RBBP9	3	0.99062	0.99073	0.999709	18697	0	-3.4252	0.033613	0.033603	0.927039	633	0	-3.4252	1.47349
OTUB2	3	0.99506	0.99518	0.999852	18794	0	-2.4908	0.033665	0.033655	0.927039	634	0	-2.4908	1.47282
KIF1BP	3	0.19624	0.34406	0.999709	6409	1	-2.9248	0.033717	0.033712	0.927039	635	0	-2.9248	1.47215
FGA	3	0.81556	0.82302	0.999709	15411	1	-4.0771	0.034081	0.034075	0.927039	636	0	-4.0771	1.46749
FOXC2	3	0.39852	0.55366	0.999709	10335	1	-3.7654	0.034081	0.034075	0.927039	637	0	-3.7654	1.46749
PRB2	3	0.99926	0.99927	1	18864	0	-2.4241	0.034081	0.034075	0.927039	638	0	-2.4241	1.46749
GOLGA6L4	3	0.33981	0.49395	0.999709	9255	1	-3.2645	0.034081	0.034075	0.927039	639	0	-3.2645	1.46749
SYTL2	3	0.87602	0.87613	0.999709	16425	0	-3.283	0.034081	0.034075	0.927039	640	0	-3.283	1.46749
EDN3	3	0.6994	0.74773	0.999709	14011	1	-4.194	0.034081	0.034075	0.927039	641	0	-4.194	1.46749
HGD	3	0.14312	0.28674	0.999709	5372	2	-4.7435	0.034081	0.034075	0.927039	642	0	-4.7435	1.46749
CCL16	3	0.28725	0.43958	0.999709	8236	2	-4.5056	0.034081	0.034075	0.927039	643	0	-4.5056	1.46749
RCSD1	3	0.048189	0.1161	0.969541	2240	1	-4.1087	0.034081	0.034075	0.927039	644	0	-4.1087	1.46749
ALKBH5	3	0.079599	0.1813	0.995571	3378	1	-4.1501	0.034081	0.034075	0.927039	645	0	-4.1501	1.46749
RAB30	3	0.060169	0.14175	0.987355	2684	2	-4.4313	0.034081	0.034075	0.927039	646	0	-4.4313	1.46749
TAS2R43	3	0.49904	0.65386	0.999709	12225	1	-3.8481	0.034081	0.034075	0.927039	647	0	-3.8481	1.46749
DOK2	3	0.78624	0.8017	0.999709	15005	1	-3.8813	0.034445	0.034435	0.927039	648	0	-3.8813	1.46287
GCGR	3	0.28105	0.43322	0.999709	8100	1	-3.3139	0.034497	0.034488	0.927039	649	0	-3.3139	1.46222
C6orf222	3	0.95956	0.95981	0.999709	18072	0	-3.277	0.034549	0.034542	0.927039	650	0	-3.277	1.46156
PCF11	3	0.17751	0.32392	0.999709	6027	2	-4.6788	0.034601	0.034593	0.927039	651	0	-4.6788	1.46091
TMEM51	3	0.64831	0.72077	0.999709	13493	1	-3.8049	0.034653	0.034639	0.927039	652	0	-3.8049	1.46026
PLD2	3	0.96074	0.96103	0.999709	18098	0	-3.6352	0.034705	0.034688	0.927039	653	0	-3.6352	1.45961
PAQR3	3	0.78802	0.80299	0.999709	15039	1	-3.4915	0.034757	0.034738	0.927039	654	0	-3.4915	1.45896
MMP27	3	0.9701	0.97027	0.999709	18280	0	-2.901	0.035225	0.035225	0.927039	655	0	-2.901	1.45315
OR5F1	3	0.78164	0.79849	0.999709	14947	1	-3.9492	0.035225	0.035225	0.927039	656	0	-3.9492	1.45315
PBX2	3	0.86891	0.86908	0.999709	16306	1	-3.9959	0.035225	0.035225	0.927039	657	0	-3.9959	1.45315
FAM221A	3	0.26445	0.41587	0.999709	7776	1	-2.1382	0.035225	0.035225	0.927039	658	0	-2.1382	1.45315
IPO4	3	0.97608	0.97626	0.999709	18404	0	-3.2645	0.035225	0.035225	0.927039	659	0	-3.2645	1.45315
TMEM59L	3	0.87086	0.87101	0.999709	16344	1	-3.881	0.035225	0.035225	0.927039	660	0	-3.881	1.45315
TECRL	3	0.19133	0.33888	0.999709	6305	2	-4.3919	0.035225	0.035225	0.927039	661	0	-4.3919	1.45315
SMARCE1	3	0.99305	0.99318	0.999709	18750	0	-1.8662	0.035225	0.035225	0.927039	662	0	-1.8662	1.45315
SPCS2	3	0.41762	0.57292	0.999709	10685	2	-4.3268	0.035225	0.035225	0.927039	663	0	-4.3268	1.45315
CLDN19	3	0.59516	0.69534	0.999709	13040	1	-3.7699	0.035225	0.035225	0.927039	664	0	-3.7699	1.45315
TSPAN11	3	0.12809	0.27028	0.999709	5054	2	-4.6692	0.035225	0.035225	0.927039	665	0	-4.6692	1.45315
RELB	3	0.99984	0.99984	1	18877	0	-2.3671	0.035225	0.035225	0.927039	666	0	-2.3671	1.45315
RBM24	3	0.4069	0.56212	0.999709	10476	1	-3.3139	0.035225	0.035225	0.927039	667	0	-3.3139	1.45315
NKIRAS2	3	0.99214	0.99225	0.999709	18727	0	-2.5012	0.035225	0.035225	0.927039	668	0	-2.5012	1.45315
FBXO11	3	0.43073	0.58602	0.999709	10948	2	-4.3086	0.035225	0.035225	0.927039	669	0	-4.3086	1.45315
OR7G3	3	0.11289	0.245	0.995571	4588	1	-2.9406	0.035693	0.035698	0.927039	670	0	-2.9406	1.44742
LOC646588	3	0.42803	0.58336	0.999709	10886	1	-3.9492	0.035745	0.035745	0.927039	671	0	-3.9492	1.44678
TROAP	3	0.45272	0.60785	0.999709	11356	2	-4.2806	0.035797	0.035791	0.927039	672	0	-4.2806	1.44615
MAP1LC3C	3	0.99768	0.99773	1	18839	0	-2.3671	0.035901	0.035886	0.927039	673	0	-2.3671	1.44489
FGF12	3	0.25451	0.40562	0.999709	7574	2	-4.5552	0.035953	0.035938	0.927039	674	0	-4.5552	1.44426
CCNC	3	0.57781	0.68745	0.999709	12886	1	-2.3671	0.036005	0.035992	0.927039	675	0	-2.3671	1.44364
CEPT1	2	0.67928	0.68332	0.999709	13790	1	-3.0092	0.03762	0.037543	0.927039	676	0	-3.0092	1.42458
ITK	2	0.81898	0.81855	0.999709	15472	0	-2.8647	0.03762	0.037543	0.927039	677	0	-2.8647	1.42458
2021-03-01	6	0.1465	0.35784	0.999709	5437	2	-3.1648	0.037883	0.037957	0.927039	678	0	-3.1648	1.42156
IZUMO3	3	0.60759	0.70107	0.999709	13143	1	-4.1193	0.039249	0.039173	0.927039	679	0	-4.1193	1.40617
LIPE	3	0.011462	0.03047	0.925947	613	2	-5.2387	0.039249	0.039173	0.927039	680	0	-5.2387	1.40617
INF2	3	0.84328	0.84568	0.999709	15860	1	-3.5955	0.039249	0.039173	0.927039	681	0	-3.5955	1.40617
FAM32A	3	0.22452	0.37392	0.999709	6976	2	-4.6009	0.039249	0.039173	0.927039	682	0	-4.6009	1.40617
PCDHB10	3	0.86309	0.86347	0.999709	16192	1	-3.2325	0.039249	0.039173	0.927039	683	0	-3.2325	1.40617
ARSK	3	0.84143	0.84405	0.999709	15836	1	-2.9227	0.039249	0.039173	0.927039	684	0	-2.9227	1.40617
THYN1	3	0.97633	0.97652	0.999709	18413	0	-1.8787	0.039249	0.039173	0.927039	685	0	-1.8787	1.40617
SPO11	3	0.13722	0.28035	0.999709	5260	2	-4.6009	0.039249	0.039173	0.927039	686	0	-4.6009	1.40617
WDR17	3	0.4414	0.59663	0.999709	11134	2	-4.2934	0.039249	0.039173	0.927039	687	0	-4.2934	1.40617
SSMEM1	3	0.77704	0.7954	0.999709	14879	1	-3.2196	0.039249	0.039173	0.927039	688	0	-3.2196	1.40617
KANSL2	3	0.088563	0.19888	0.995571	3715	1	-3.9217	0.039249	0.039173	0.927039	689	0	-3.9217	1.40617
CPPED1	3	0.97074	0.97089	0.999709	18298	0	-3.0027	0.039249	0.039173	0.927039	690	0	-3.0027	1.40617
SLC4A10	3	0.024686	0.062885	0.927072	1264	1	-3.3914	0.039249	0.039173	0.927039	691	0	-3.3914	1.40617
C4orf32	3	0.89165	0.89171	0.999709	16728	0	-2.7104	0.039249	0.039173	0.927039	692	0	-2.7104	1.40617
BARD1	3	0.11854	0.25522	0.995571	4787	2	-4.7946	0.039249	0.039173	0.927039	693	0	-4.7946	1.40617
RFPL4B	3	0.82579	0.8311	0.999709	15571	1	-3.9918	0.039249	0.039173	0.927039	694	0	-3.9918	1.40617
FUT3	3	0.067735	0.15731	0.991277	2967	1	-3.734	0.039249	0.039173	0.927039	695	0	-3.734	1.40617
AHSP	3	0.76352	0.7865	0.999709	14727	1	-3.6054	0.039249	0.039173	0.927039	696	0	-3.6054	1.40617
PPAN-P2RY11	3	0.44964	0.60477	0.999709	11297	1	-3.0326	0.039249	0.039173	0.927039	697	0	-3.0326	1.40617
INVS	3	0.32369	0.47745	0.999709	8958	2	-4.4566	0.039249	0.039173	0.927039	698	0	-4.4566	1.40617
OXER1	3	0.86516	0.86546	0.999709	16230	1	-3.8177	0.039249	0.039173	0.927039	699	0	-3.8177	1.40617
HRC	3	0.26802	0.4196	0.999709	7854	1	-3.0905	0.039249	0.039173	0.927039	700	0	-3.0905	1.40617
MGAM2	3	0.24876	0.39951	0.999709	7462	2	-4.5632	0.039249	0.039173	0.927039	701	0	-4.5632	1.40617
FAM180A	3	0.86271	0.86311	0.999709	16185	1	-2.4014	0.039249	0.039173	0.927039	702	0	-2.4014	1.40617
KIRREL2	3	0.56777	0.68306	0.999709	12791	1	-3.9135	0.039249	0.039173	0.927039	703	0	-3.9135	1.40617
CYP26C1	3	0.92168	0.92175	0.999709	17333	0	-3.2898	0.039249	0.039173	0.927039	704	0	-3.2898	1.40617
ARMCX6	3	0.99133	0.99143	0.999709	18710	0	-3.397	0.039249	0.039173	0.927039	705	0	-3.397	1.40617
SPATA31A5	3	0.10829	0.23646	0.995571	4417	2	-4.8184	0.039249	0.039173	0.927039	706	0	-4.8184	1.40617
KDM1A	3	0.056801	0.13464	0.983827	2562	2	-4.9674	0.039249	0.039173	0.927039	707	0	-4.9674	1.40617
MYEF2	3	0.054541	0.12982	0.979476	2484	2	-4.9767	0.039249	0.039173	0.927039	708	0	-4.9767	1.40617
MC3R	3	0.98394	0.9841	0.999709	18560	0	-3.0762	0.039249	0.039173	0.927039	709	0	-3.0762	1.40617
GTF2H4	3	0.96121	0.96148	0.999709	18109	0	-1.7099	0.039249	0.039173	0.927039	710	0	-1.7099	1.40617
ZNF667	3	0.068192	0.1582	0.991643	2978	2	-4.487	0.039249	0.039173	0.927039	711	0	-4.487	1.40617
KRTAP4-12	3	0.57378	0.68569	0.999709	12843	1	-3.7521	0.039249	0.039173	0.927039	712	0	-3.7521	1.40617
LMNTD2	3	0.0027927	0.0077984	0.873429	161	1	-3.9881	0.039249	0.039173	0.927039	713	0	-3.9881	1.40617
IFT52	3	0.021209	0.054567	0.925947	1086	2	-5.1423	0.039249	0.039173	0.927039	714	0	-5.1423	1.40617
RRS1	3	0.29352	0.44607	0.999709	8366	1	-3.1114	0.039249	0.039173	0.927039	715	0	-3.1114	1.40617
DSG1	3	0.32226	0.47594	0.999709	8938	1	-4.0442	0.039249	0.039173	0.927039	716	0	-4.0442	1.40617
TNFRSF10A	3	0.99988	0.99988	1	18879	0	-1.8989	0.039249	0.039173	0.927039	717	0	-1.8989	1.40617
KCNG1	3	0.99697	0.99701	0.999916	18828	0	-2.2694	0.039249	0.039173	0.927039	718	0	-2.2694	1.40617
IFT88	3	0.08163	0.18535	0.995571	3463	2	-4.8896	0.039249	0.039173	0.927039	719	0	-4.8896	1.40617
C19orf33	3	0.84235	0.84486	0.999709	15848	1	-3.4698	0.039249	0.039173	0.927039	720	0	-3.4698	1.40617
FAM129B	3	0.15604	0.30071	0.999709	5603	2	-4.7207	0.039249	0.039173	0.927039	721	0	-4.7207	1.40617
GLO1	3	0.8849	0.88498	0.999709	16596	0	-3.4142	0.039249	0.039173	0.927039	722	0	-3.4142	1.40617
MTOR	3	0.92649	0.92662	0.999709	17425	0	-1.8989	0.039249	0.039173	0.927039	723	0	-1.8989	1.40617
SLC20A1	3	0.21088	0.35967	0.999709	6698	1	-3.6446	0.039249	0.039173	0.927039	724	0	-3.6446	1.40617
RALGPS2	3	0.73959	0.77133	0.999709	14468	1	-3.7296	0.039249	0.039173	0.927039	725	0	-3.7296	1.40617
KDM4B	3	0.56104	0.68012	0.999709	12735	1	-3.8521	0.039249	0.039173	0.927039	726	0	-3.8521	1.40617
ZNF80	3	0.36644	0.52116	0.999709	9747	2	-4.3947	0.039249	0.039173	0.927039	727	0	-4.3947	1.40617
DLL4	3	0.7671	0.7888	0.999709	14759	1	-3.7065	0.039249	0.039173	0.927039	728	0	-3.7065	1.40617
KRTAP12-2	3	0.85852	0.85921	0.999709	16120	1	-3.0397	0.039249	0.039173	0.927039	729	0	-3.0397	1.40617
PIGF	3	0.86828	0.86845	0.999709	16302	1	-3.7202	0.039249	0.039173	0.927039	730	0	-3.7202	1.40617
UGCG	3	0.74186	0.77271	0.999709	14498	1	-4.0697	0.039249	0.039173	0.927039	731	0	-4.0697	1.40617
MYCL	3	0.9834	0.98355	0.999709	18549	0	-3.3795	0.039249	0.039173	0.927039	732	0	-3.3795	1.40617
PTGES3	3	0.97201	0.9722	0.999709	18327	0	-3.6542	0.039249	0.039173	0.927039	733	0	-3.6542	1.40617
EHD4	3	0.007486	0.020308	0.880817	429	2	-5.3027	0.039249	0.039173	0.927039	734	0	-5.3027	1.40617
LOX	3	0.99333	0.99347	0.999709	18760	0	-2.8172	0.039249	0.039173	0.927039	735	0	-2.8172	1.40617
KIAA1211L	3	0.98657	0.98672	0.999709	18617	0	-1.552	0.039249	0.039173	0.927039	736	0	-1.552	1.40617
TCF3	3	0.85794	0.85867	0.999709	16108	1	-3.8091	0.039249	0.039173	0.927039	737	0	-3.8091	1.40617
CABP1	3	0.019044	0.049255	0.925947	971	2	-5.1594	0.039249	0.039173	0.927039	738	0	-5.1594	1.40617
CLEC4M	3	0.1763	0.32259	0.999709	6002	2	-4.6811	0.039249	0.039173	0.927039	739	0	-4.6811	1.40617
IFNA2	3	0.39903	0.55418	0.999709	10339	1	-2.6822	0.039249	0.039173	0.927039	740	0	-2.6822	1.40617
CAVIN3	3	0.46483	0.62003	0.999709	11582	2	-4.2459	0.039249	0.039173	0.927039	741	0	-4.2459	1.40617
SLC35B2	3	0.95583	0.95612	0.999709	18003	0	-3.2065	0.039249	0.039173	0.927039	742	0	-3.2065	1.40617
NOP16	3	0.24617	0.39675	0.999709	7409	2	-4.5681	0.039249	0.039173	0.927039	743	0	-4.5681	1.40617
NKD1	3	0.32874	0.48259	0.999709	9046	2	-4.4484	0.039249	0.039173	0.927039	744	0	-4.4484	1.40617
SLC26A8	3	0.62855	0.71106	0.999709	13311	1	-3.3564	0.039249	0.039173	0.927039	745	0	-3.3564	1.40617
TAC4	3	0.68666	0.74071	0.999709	13875	1	-4.1842	0.039249	0.039173	0.927039	746	0	-4.1842	1.40617
CEACAM7	3	0.11378	0.24661	0.995571	4608	1	-3.9376	0.039249	0.039173	0.927039	747	0	-3.9376	1.40617
MAP1B	3	0.83507	0.83868	0.999709	15730	1	-3.9176	0.039249	0.039173	0.927039	748	0	-3.9176	1.40617
ITPRIPL1	3	0.74503	0.7747	0.999709	14529	1	-3.5288	0.039249	0.039173	0.927039	749	0	-3.5288	1.40617
TFPI	3	0.055555	0.13204	0.983567	2515	2	-4.9729	0.039249	0.039173	0.927039	750	0	-4.9729	1.40617
PPP1R15B	3	0.24978	0.40058	0.999709	7476	1	-2.4241	0.039249	0.039173	0.927039	751	0	-2.4241	1.40617
PNPLA6	3	0.79819	0.81013	0.999709	15177	1	-3.9096	0.039249	0.039173	0.927039	752	0	-3.9096	1.40617
ASB4	3	0.04077	0.099761	0.958624	1930	2	-4.4748	0.039249	0.039173	0.927039	753	0	-4.4748	1.40617
TAF1L	3	0.99324	0.99339	0.999709	18758	0	-3.0173	0.039249	0.039173	0.927039	754	0	-3.0173	1.40617
CMPK2	3	0.69032	0.74268	0.999709	13907	1	-2.1382	0.039249	0.039173	0.927039	755	0	-2.1382	1.40617
PRIM1	3	0.82891	0.83362	0.999709	15637	1	-3.8136	0.039249	0.039173	0.927039	756	0	-3.8136	1.40617
ACSM5	3	0.63336	0.71343	0.999709	13348	1	-3.7062	0.039249	0.039173	0.927039	757	0	-3.7062	1.40617
C1orf106	3	0.29417	0.44677	0.999709	8371	1	-3.0473	0.039249	0.039173	0.927039	758	0	-3.0473	1.40617
GLI4	3	0.28725	0.43958	0.999709	8237	2	-4.5056	0.039249	0.039173	0.927039	759	0	-4.5056	1.40617
CIDEC	3	0.99791	0.99796	1	18844	0	-3.0173	0.039249	0.039173	0.927039	760	0	-3.0173	1.40617
NDUFS5	3	0.29883	0.45168	0.999709	8479	1	-3.881	0.039249	0.039173	0.927039	761	0	-3.881	1.40617
CHMP4C	3	0.99341	0.99354	0.999709	18762	0	-3.0326	0.039249	0.039173	0.927039	762	0	-3.0326	1.40617
MYO7A	3	0.92757	0.9277	0.999709	17450	0	-2.1654	0.039249	0.039173	0.927039	763	0	-2.1654	1.40617
DHPS	3	0.99516	0.99527	0.999852	18796	0	-1.9954	0.039249	0.039173	0.927039	764	0	-1.9954	1.40617
RNF135	3	0.49646	0.65136	0.999709	12199	1	-3.7158	0.039249	0.039173	0.927039	765	0	-3.7158	1.40617
MAN2A2	3	0.98901	0.98913	0.999709	18655	0	-3.3617	0.039249	0.039173	0.927039	766	0	-3.3617	1.40617
NMNAT2	3	0.31267	0.46613	0.999709	8722	2	-4.473	0.039249	0.039173	0.927039	767	0	-4.473	1.40617
HMX1	3	0.99981	0.99981	1	18876	0	-2.3671	0.039249	0.039173	0.927039	768	0	-2.3671	1.40617
TACC1	3	0.95504	0.95535	0.999709	17990	0	-3.326	0.039249	0.039173	0.927039	769	0	-3.326	1.40617
ZNF852	3	0.63722	0.71534	0.999709	13382	1	-2.1131	0.039249	0.039173	0.927039	770	0	-2.1131	1.40617
ATXN3L	3	0.87227	0.87242	0.999709	16356	1	-4.1908	0.039249	0.039173	0.927039	771	0	-4.1908	1.40617
C11orf63	3	0.25272	0.40366	0.999709	7531	1	-3.1732	0.039249	0.039173	0.927039	772	0	-3.1732	1.40617
RPS6	3	0.035641	0.088184	0.958624	1706	1	-3.441	0.039249	0.039173	0.927039	773	0	-3.441	1.40617
F8A1	3	0.71852	0.75868	0.999709	14224	1	-2.1626	0.039249	0.039173	0.927039	774	0	-2.1626	1.40617
OR4C13	3	0.82689	0.83196	0.999709	15596	1	-4.1195	0.039249	0.039173	0.927039	775	0	-4.1195	1.40617
SEPHS1	3	0.61158	0.70292	0.999709	13174	1	-2.9876	0.039249	0.039173	0.927039	776	0	-2.9876	1.40617
LSG1	3	0.061751	0.14502	0.990171	2741	1	-4.0254	0.039249	0.039173	0.927039	777	0	-4.0254	1.40617
TOP3B	3	0.80675	0.81631	0.999709	15290	1	-3.7521	0.039249	0.039173	0.927039	778	0	-3.7521	1.40617
NUMB	3	0.86271	0.86311	0.999709	16189	1	-3.9096	0.039249	0.039173	0.927039	779	0	-3.9096	1.40617
MEP1A	3	0.24617	0.39675	0.999709	7410	2	-4.5681	0.039249	0.039173	0.927039	780	0	-4.5681	1.40617
CXCR2	3	0.47904	0.63412	0.999709	11844	1	-3.5701	0.039249	0.039173	0.927039	781	0	-3.5701	1.40617
RUFY1	3	0.89165	0.89171	0.999709	16730	0	-3.3384	0.039249	0.039173	0.927039	782	0	-3.3384	1.40617
ABRA	3	0.73509	0.76856	0.999709	14417	1	-3.801	0.039249	0.039173	0.927039	783	0	-3.801	1.40617
DEPDC7	3	0.74569	0.77511	0.999709	14532	1	-3.5955	0.039249	0.039173	0.927039	784	0	-3.5955	1.40617
SERPINA2	3	0.7473	0.77614	0.999709	14549	1	-3.9376	0.039249	0.039173	0.927039	785	0	-3.9376	1.40617
OPRK1	3	0.099108	0.21912	0.995571	4098	1	-3.7788	0.039249	0.039173	0.927039	786	0	-3.7788	1.40617
SYP	3	0.99525	0.99536	0.999852	18798	0	-2.6342	0.039249	0.039173	0.927039	787	0	-2.6342	1.40617
DNAJC8	3	0.99868	0.99872	1	18853	0	-2.9166	0.039249	0.039173	0.927039	788	0	-2.9166	1.40617
EMC10	3	0.51926	0.66264	0.999709	12389	1	-4.1369	0.039249	0.039173	0.927039	789	0	-4.1369	1.40617
CYP4A11	3	0.31182	0.46523	0.999709	8702	2	-4.4732	0.039249	0.039173	0.927039	790	0	-4.4732	1.40617
ANO7	3	0.071845	0.16567	0.995571	3103	2	-4.9181	0.039249	0.039173	0.927039	791	0	-4.9181	1.40617
DRAM1	3	0.053948	0.12855	0.979476	2459	1	-3.4414	0.039249	0.039173	0.927039	792	0	-3.4414	1.40617
RYR2	3	0.12342	0.26404	0.99798	4953	1	-3.961	0.039249	0.039173	0.927039	793	0	-3.961	1.40617
SPIN2A	3	0.60398	0.69939	0.999709	13110	1	-3.9802	0.039249	0.039173	0.927039	794	0	-3.9802	1.40617
SNAPC1	3	0.064504	0.15065	0.990171	2842	1	-2.0822	0.039249	0.039173	0.927039	795	0	-2.0822	1.40617
KIAA1217	3	0.90502	0.90511	0.999709	16994	0	-3.4142	0.039249	0.039173	0.927039	796	0	-3.4142	1.40617
TYW5	3	0.028947	0.0729	0.945541	1442	2	-4.4621	0.039249	0.039173	0.927039	797	0	-4.4621	1.40617
PDE4A	3	0.76352	0.7865	0.999709	14725	1	-2.6048	0.039249	0.039173	0.927039	798	0	-2.6048	1.40617
NOTCH2	1	0.95966	0.95995	0.999709	18079	0	-2.2317	0.040341	0.040243	0.951183	799	0	-2.2317	1.39425
SGK2	2	0.085058	0.14681	0.990171	3584	1	-3.2384	0.041273	0.041235	0.951953	800	0	-3.2384	1.38433
PUS3	3	0.00045251	0.0013539	0.850458	29	1	-2.7648	0.042485	0.042421	0.951953	801	0	-2.7648	1.37176
KRCC1	3	0.43204	0.58732	0.999709	10974	2	-4.2776	0.042588	0.042538	0.951953	802	0	-4.2776	1.37071
SH3BGRL2	3	0.025105	0.063902	0.927805	1284	2	-4.3537	0.04264	0.042587	0.951953	803	0	-4.3537	1.37018
TRMT10B	3	0.91789	0.918	0.999709	17260	0	-2.7376	0.042692	0.042637	0.951953	804	0	-2.7376	1.36965
STX11	3	0.88453	0.88462	0.999709	16586	0	-3.2133	0.042744	0.042695	0.951953	805	0	-3.2133	1.36912
NPFFR1	3	0.046358	0.11211	0.965033	2175	2	-5.0073	0.042795	0.042752	0.951953	806	0	-5.0073	1.36861
NR3C1	3	0.72898	0.76488	0.999709	14343	1	-3.6153	0.042847	0.042804	0.951953	807	0	-3.6153	1.36808
C9orf172	3	0.4096	0.56484	0.999709	10534	2	-4.23	0.042899	0.042857	0.951953	808	0	-4.23	1.36755
KDM4E	3	0.070349	0.1626	0.994412	3049	2	-4.638	0.04295	0.042901	0.951953	809	0	-4.638	1.36704
SSX5	3	0.31254	0.46601	0.999709	8720	1	-2.5224	0.043002	0.042946	0.951953	810	0	-2.5224	1.36651
DYSF	3	0.80055	0.81183	0.999709	15209	1	-3.5339	0.043054	0.042999	0.951953	811	0	-3.5339	1.36599
SLC17A1	3	0.92962	0.92977	0.999709	17493	0	-3.6542	0.043106	0.043045	0.951953	812	0	-3.6542	1.36546
ANKRD36	3	0.036031	0.089072	0.958624	1722	1	-3.6302	0.043157	0.043096	0.951953	813	0	-3.6302	1.36495
USE1	3	0.70591	0.75143	0.999709	14090	1	-3.734	0.043261	0.043205	0.951953	814	0	-3.734	1.3639
LTV1	3	0.5338	0.66866	0.999709	12521	1	-3.497	0.043312	0.043261	0.951953	815	0	-3.497	1.36339
RHBDD1	3	0.29386	0.44645	0.999709	8369	1	-3.8521	0.043364	0.043316	0.951953	816	0	-3.8521	1.36287
IGDCC3	2	0.49588	0.53988	0.999709	12183	1	-3.1981	0.043409	0.043366	0.951953	817	0	-3.1981	1.36242
B4GALT5	3	0.035524	0.087896	0.958624	1700	2	-5.0555	0.043467	0.043418	0.951953	818	0	-5.0555	1.36184
LUC7L	3	0.84328	0.84568	0.999709	15862	1	-3.5599	0.043467	0.043418	0.951953	819	0	-3.5599	1.36184
ASTN1	3	0.1841	0.33106	0.999709	6166	2	-4.667	0.043467	0.043418	0.951953	820	0	-4.667	1.36184
ADAM20	3	0.19504	0.3428	0.999709	6383	2	-4.2776	0.043571	0.043529	0.951953	821	0	-4.2776	1.3608
S100A16	3	0.57183	0.6848	0.999709	12827	1	-1.9155	0.043623	0.043581	0.951953	822	0	-1.9155	1.36028
TTYH3	3	0.97406	0.97423	0.999709	18367	0	-3.3617	0.043674	0.043638	0.951953	823	0	-3.3617	1.35978
ZXDC	3	0.45203	0.60715	0.999709	11349	1	-3.5074	0.043726	0.043684	0.951953	824	0	-3.5074	1.35926
IER3IP1	3	0.8777	0.87779	0.999709	16453	0	-1.8989	0.043778	0.043739	0.951953	825	0	-1.8989	1.35874
ZNF527	3	0.2441	0.39461	0.999709	7360	2	-4.5707	0.043829	0.043788	0.951953	826	0	-4.5707	1.35824
HNRNPA3	3	0.91643	0.91649	0.999709	17231	0	-2.1654	0.043881	0.043831	0.951953	827	0	-2.1654	1.35772
RPRML	3	0.46658	0.62175	0.999709	11615	2	-4.2618	0.043933	0.043882	0.951953	828	0	-4.2618	1.35721
IL16	3	0.29998	0.45292	0.999709	8495	1	-2.77	0.045843	0.045791	0.951953	829	0	-2.77	1.33873
ICA1	3	0.41187	0.5671	0.999709	10570	2	-4.333	0.045843	0.045791	0.951953	830	0	-4.333	1.33873
TARBP1	3	0.8478	0.84959	0.999709	15932	1	-3.01	0.045843	0.045791	0.951953	831	0	-3.01	1.33873
KRBA1	3	0.77519	0.79416	0.999709	14862	1	-3.575	0.045843	0.045791	0.951953	832	0	-3.575	1.33873
TXNDC8	3	0.88574	0.88582	0.999709	16611	0	-3.8177	0.045843	0.045791	0.951953	833	0	-3.8177	1.33873
PCDHA6	3	0.15901	0.30389	0.999709	5667	2	-4.7159	0.045843	0.045791	0.951953	834	0	-4.7159	1.33873
YLPM1	3	0.68814	0.74149	0.999709	13889	1	-3.8221	0.045843	0.045791	0.951953	835	0	-3.8221	1.33873
FAM58A	3	0.2514	0.40228	0.999709	7504	1	-4.0257	0.045843	0.045791	0.951953	836	0	-4.0257	1.33873
VNN1	3	0.80406	0.81435	0.999709	15258	1	-3.3564	0.045843	0.045791	0.951953	837	0	-3.3564	1.33873
SCAMP2	3	0.70774	0.75247	0.999709	14107	1	-2.9186	0.045843	0.045791	0.951953	838	0	-2.9186	1.33873
C20orf197	3	0.96289	0.96312	0.999709	18142	0	-3.326	0.045843	0.045791	0.951953	839	0	-3.326	1.33873
ARSE	3	0.92533	0.92543	0.999709	17407	0	-3.9688	0.045843	0.045791	0.951953	840	0	-3.9688	1.33873
PLEKHM3	3	0.4259	0.5812	0.999709	10844	2	-4.3149	0.045843	0.045791	0.951953	841	0	-4.3149	1.33873
RAPGEF6	3	0.57378	0.68569	0.999709	12848	1	-3.9957	0.045843	0.045791	0.951953	842	0	-3.9957	1.33873
SFT2D1	3	0.76473	0.78728	0.999709	14734	1	-3.6262	0.045843	0.045791	0.951953	843	0	-3.6262	1.33873
VSTM1	3	0.18512	0.33216	0.999709	6182	2	-4.6667	0.045843	0.045791	0.951953	844	0	-4.6667	1.33873
SMAD1	3	0.84556	0.84765	0.999709	15891	1	-3.4084	0.045843	0.045791	0.951953	845	0	-3.4084	1.33873
CNPY4	3	0.89352	0.89358	0.999709	16762	0	-3.283	0.045843	0.045791	0.951953	846	0	-3.283	1.33873
HOXB4	3	0.32369	0.47745	0.999709	8960	2	-4.4566	0.045843	0.045791	0.951953	847	0	-4.4566	1.33873
METTL21A	3	0.35331	0.50773	0.999709	9503	2	-4.4146	0.045843	0.045791	0.951953	848	0	-4.4146	1.33873
FBLIM1	3	0.99954	0.99953	1	18870	0	-2.6048	0.045843	0.045791	0.951953	849	0	-2.6048	1.33873
BRAF	3	0.89407	0.89415	0.999709	16774	0	-2.6913	0.045843	0.045791	0.951953	850	0	-2.6913	1.33873
PAK3	3	0.18065	0.32735	0.999709	6094	1	-3.9492	0.045843	0.045791	0.951953	851	0	-3.9492	1.33873
TUBGCP2	3	0.9759	0.97609	0.999709	18399	0	-1.8989	0.045843	0.045791	0.951953	852	0	-1.8989	1.33873
ERFE	3	0.093685	0.20878	0.995571	3900	2	-4.8564	0.045843	0.045791	0.951953	853	0	-4.8564	1.33873
CLDN18	3	0.66603	0.7298	0.999709	13653	1	-3.3678	0.045843	0.045791	0.951953	854	0	-3.3678	1.33873
KRTAP20-2	3	0.95628	0.95657	0.999709	18008	0	-3.3442	0.045843	0.045791	0.951953	855	0	-3.3442	1.33873
SALL3	3	0.69032	0.74268	0.999709	13904	1	-3.3139	0.045843	0.045791	0.951953	856	0	-3.3139	1.33873
TAF8	3	0.87637	0.87649	0.999709	16427	0	-4.1708	0.045843	0.045791	0.951953	857	0	-4.1708	1.33873
FREM1	3	0.19158	0.33915	0.999709	6315	2	-4.6549	0.045843	0.045791	0.951953	858	0	-4.6549	1.33873
KLF2	3	0.90591	0.90602	0.999709	17001	0	-2.2183	0.045843	0.045791	0.951953	859	0	-2.2183	1.33873
ADIRF	3	0.42821	0.58354	0.999709	10893	2	-4.3118	0.045843	0.045791	0.951953	860	0	-4.3118	1.33873
ELFN1	3	0.99666	0.99672	0.999916	18819	0	-2.7288	0.045843	0.045791	0.951953	861	0	-2.7288	1.33873
IL2RG	3	0.28053	0.43266	0.999709	8095	2	-4.5161	0.045843	0.045791	0.951953	862	0	-4.5161	1.33873
ACTL6B	3	0.95583	0.95612	0.999709	18002	0	-3.22	0.045843	0.045791	0.951953	863	0	-3.22	1.33873
IPO5	3	0.53442	0.66891	0.999709	12528	1	-3.818	0.045843	0.045791	0.951953	864	0	-3.818	1.33873
ZNF563	3	0.35315	0.50755	0.999709	9496	2	-4.2525	0.045843	0.045791	0.951953	865	0	-4.2525	1.33873
SLC39A14	3	0.82261	0.82863	0.999709	15528	1	-3.5906	0.045843	0.045791	0.951953	866	0	-3.5906	1.33873
RAB34	3	0.62004	0.70691	0.999709	13248	1	-3.2938	0.045843	0.045791	0.951953	867	0	-3.2938	1.33873
SLCO2A1	3	0.11915	0.25631	0.995571	4808	2	-4.7925	0.045843	0.045791	0.951953	868	0	-4.7925	1.33873
DEFB123	3	0.89085	0.89092	0.999709	16712	0	-3.4589	0.045843	0.045791	0.951953	869	0	-3.4589	1.33873
LRRFIP2	3	0.99399	0.9941	0.999709	18779	0	-3.283	0.045843	0.045791	0.951953	870	0	-3.283	1.33873
NR1I2	3	0.32081	0.47445	0.999709	8899	2	-4.4596	0.045843	0.045791	0.951953	871	0	-4.4596	1.33873
HEBP1	3	0.20866	0.35731	0.999709	6659	2	-4.6256	0.045843	0.045791	0.951953	872	0	-4.6256	1.33873
KIAA0040	3	0.42491	0.58022	0.999709	10820	1	-2.901	0.045843	0.045791	0.951953	873	0	-2.901	1.33873
GOT1L1	3	0.14223	0.28575	0.999709	5355	2	-4.7457	0.045843	0.045791	0.951953	874	0	-4.7457	1.33873
CETN2	3	0.34808	0.50234	0.999709	9411	2	-4.4204	0.045843	0.045791	0.951953	875	0	-4.4204	1.33873
DNAJB3	3	0.92089	0.92096	0.999709	17322	0	-3.7475	0.045843	0.045791	0.951953	876	0	-3.7475	1.33873
MTCH1	3	0.94101	0.94117	0.999709	17707	0	-3.6003	0.045843	0.045791	0.951953	877	0	-3.6003	1.33873
RAB6C	3	0.90941	0.90953	0.999709	17077	0	-3.6831	0.045843	0.045791	0.951953	878	0	-3.6831	1.33873
CLEC4E	3	0.9834	0.98355	0.999709	18552	0	-2.3069	0.045843	0.045791	0.951953	879	0	-2.3069	1.33873
RXRA	3	0.77704	0.7954	0.999709	14882	1	-3.9217	0.045843	0.045791	0.951953	880	0	-3.9217	1.33873
C5orf42	3	0.99784	0.99789	1	18843	0	-2.9005	0.045843	0.045791	0.951953	881	0	-2.9005	1.33873
ACE	3	0.054512	0.12976	0.979476	2482	1	-3.5183	0.045843	0.045791	0.951953	882	0	-3.5183	1.33873
TPD52L1	3	0.27283	0.4246	0.999709	7947	2	-4.5266	0.045843	0.045791	0.951953	883	0	-4.5266	1.33873
GCG	3	0.80675	0.81631	0.999709	15298	1	-3.5499	0.045843	0.045791	0.951953	884	0	-3.5499	1.33873
COIL	3	0.91102	0.91112	0.999709	17104	0	-3.4589	0.045843	0.045791	0.951953	885	0	-3.4589	1.33873
TM4SF20	3	0.2114	0.36021	0.999709	6714	1	-4.2107	0.045843	0.045791	0.951953	886	0	-4.2107	1.33873
TMPRSS3	3	0.92572	0.92582	0.999709	17410	0	-3.8894	0.045843	0.045791	0.951953	887	0	-3.8894	1.33873
ZDHHC17	3	0.90675	0.90685	0.999709	17018	0	-3.0947	0.045843	0.045791	0.951953	888	0	-3.0947	1.33873
KTN1	3	0.66679	0.73019	0.999709	13657	1	-4.0071	0.045843	0.045791	0.951953	889	0	-4.0071	1.33873
DVL2	3	0.45041	0.60551	0.999709	11311	2	-4.2681	0.045843	0.045791	0.951953	890	0	-4.2681	1.33873
MASP2	3	0.5857	0.69097	0.999709	12951	1	-3.3143	0.045843	0.045791	0.951953	891	0	-3.3143	1.33873
FAS	3	0.28509	0.43736	0.999709	8193	2	-4.5084	0.045843	0.045791	0.951953	892	0	-4.5084	1.33873
SUN3	3	0.30857	0.4619	0.999709	8664	1	-2.4241	0.045843	0.045791	0.951953	893	0	-2.4241	1.33873
LARP4B	3	0.7236	0.76167	0.999709	14293	1	-2.5639	0.045843	0.045791	0.951953	894	0	-2.5639	1.33873
CNOT9	3	0.97454	0.97472	0.999709	18377	0	-3.1466	0.045843	0.045791	0.951953	895	0	-3.1466	1.33873
KRTAP26-1	3	0.94965	0.94986	0.999709	17869	0	-3.9256	0.045843	0.045791	0.951953	896	0	-3.9256	1.33873
UBE2L3	3	0.21498	0.36399	0.999709	6786	2	-4.6136	0.045843	0.045791	0.951953	897	0	-4.6136	1.33873
PRAMEF8	1	0.95406	0.95431	0.999709	17965	0	-2.1008	0.045941	0.045947	0.951953	898	0	-2.1008	1.3378
CCDC59	2	0.67334	0.67804	0.999709	13728	1	-3.0947	0.045977	0.045968	0.951953	899	0	-3.0947	1.33746
SLFN11	2	0.51527	0.55368	0.999709	12367	1	-3.2193	0.045977	0.045968	0.951953	900	0	-3.2193	1.33746
RPGRIP1	3	0.74948	0.77751	0.999709	14580	1	-2.1654	0.047751	0.047679	0.951953	901	0	-2.1654	1.32102
SAMD4A	3	0.49904	0.65386	0.999709	12226	1	-3.4915	0.047803	0.047734	0.951953	902	0	-3.4915	1.32054
FIBCD1	3	0.33763	0.4917	0.999709	9215	2	-4.4371	0.047854	0.047786	0.951953	903	0	-4.4371	1.32008
PDHX	3	0.16552	0.31093	0.999709	5788	1	-3.7918	0.047906	0.047835	0.951953	904	0	-3.7918	1.31961
C8orf31	3	0.38204	0.53695	0.999709	10035	2	-4.3742	0.047983	0.04792	0.951953	905	0	-4.3742	1.31891
GAB1	3	0.01631	0.042543	0.925947	849	1	-3.6352	0.047983	0.04792	0.951953	906	0	-3.6352	1.31891
OR1D5	3	0.99214	0.99225	0.999709	18728	0	-2.8677	0.048524	0.048477	0.951953	907	0	-2.8677	1.31404
OR7C1	3	0.97201	0.9722	0.999709	18324	0	-3.5396	0.048524	0.048477	0.951953	908	0	-3.5396	1.31404
TERF2	3	0.11265	0.24453	0.995571	4577	1	-2.5945	0.048524	0.048477	0.951953	909	0	-2.5945	1.31404
GUCA2A	3	0.59857	0.69693	0.999709	13068	1	-3.9767	0.048524	0.048477	0.951953	910	0	-3.9767	1.31404
PRDX2	3	0.42677	0.58207	0.999709	10859	2	-4.3147	0.048524	0.048477	0.951953	911	0	-4.3147	1.31404
RPL10A	3	0.30114	0.45414	0.999709	8526	1	-3.277	0.048524	0.048477	0.951953	912	0	-3.277	1.31404
DEFB135	3	0.84235	0.84486	0.999709	15849	1	-3.885	0.048524	0.048477	0.951953	913	0	-3.885	1.31404
B3GALT5	3	0.44783	0.60297	0.999709	11259	1	-3.8936	0.048524	0.048477	0.951953	914	0	-3.8936	1.31404
ARSG	3	0.98173	0.98189	0.999709	18517	0	-2.9171	0.048524	0.048477	0.951953	915	0	-2.9171	1.31404
RBMXL3	3	0.1453	0.2891	0.999709	5410	2	-4.6008	0.048524	0.048477	0.951953	916	0	-4.6008	1.31404
WDR70	3	0.97608	0.97626	0.999709	18402	0	-3.6003	0.048524	0.048477	0.951953	917	0	-3.6003	1.31404
MTFR1L	3	0.99587	0.99595	0.999868	18811	0	-2.1654	0.048524	0.048477	0.951953	918	0	-2.1654	1.31404
DIEXF	3	0.72424	0.76204	0.999709	14305	1	-3.1462	0.048524	0.048477	0.951953	919	0	-3.1462	1.31404
IGF2BP1	3	0.40592	0.56114	0.999709	10461	1	-2.826	0.048524	0.048477	0.951953	920	0	-2.826	1.31404
TCEAL8	3	0.29763	0.45046	0.999709	8456	1	-3.5496	0.048524	0.048477	0.951953	921	0	-3.5496	1.31404
MT1M	3	0.99918	0.99919	1	18863	0	-2.6245	0.048524	0.048477	0.951953	922	0	-2.6245	1.31404
NMRK1	3	0.38372	0.5387	0.999709	10064	2	-4.3714	0.048524	0.048477	0.951953	923	0	-4.3714	1.31404
DGKZ	3	0.98271	0.98287	0.999709	18536	0	-2.5744	0.049039	0.049	0.951953	924	0	-2.5744	1.30946
CLPTM1	3	0.021645	0.055618	0.925947	1103	2	-5.1402	0.049091	0.049059	0.951953	925	0	-5.1402	1.309
CLTB	3	0.38447	0.53941	0.999709	10075	1	-3.6831	0.049142	0.049111	0.951953	926	0	-3.6831	1.30855
HMGCLL1	3	0.45887	0.61407	0.999709	11472	2	-4.2714	0.049194	0.049171	0.951953	927	0	-4.2714	1.30809
EIF4B	3	0.86214	0.86256	0.999709	16180	1	-3.818	0.049245	0.049224	0.951953	928	0	-3.818	1.30764
DUX4	3	0.073945	0.16989	0.995571	3174	1	-3.5077	0.049297	0.049273	0.951953	929	0	-3.5077	1.30718
ZNF264	3	0.83034	0.83479	0.999709	15652	1	-3.3143	0.049348	0.049322	0.951953	930	0	-3.3143	1.30673
ITGA3	3	0.13217	0.27481	0.999709	5137	1	-4.1505	0.0494	0.04938	0.951953	931	0	-4.1505	1.30627
CPNE9	3	0.10052	0.22184	0.995571	4158	1	-4.1741	0.049451	0.049438	0.951953	932	0	-4.1741	1.30582
RPEL1	3	0.77519	0.79416	0.999709	14858	1	-4.0144	0.049991	0.05	0.951953	933	0	-4.0144	1.30111
TRIML1	3	0.92089	0.92096	0.999709	17320	0	-3.5906	0.049991	0.05	0.951953	934	0	-3.5906	1.30111
PACSIN1	3	0.85377	0.8549	0.999709	16041	1	-2.2694	0.049991	0.05	0.951953	935	0	-2.2694	1.30111
ZBTB40	3	0.19904	0.34703	0.999709	6457	1	-3.9253	0.049991	0.05	0.951953	936	0	-3.9253	1.30111
VSNL1	3	0.66417	0.7288	0.999709	13637	1	-3.8481	0.049991	0.05	0.951953	937	0	-3.8481	1.30111
ABCA3	3	0.27557	0.42751	0.999709	8003	1	-4.194	0.049991	0.05	0.951953	938	0	-4.194	1.30111
SUV39H1	3	0.9186	0.91868	0.999709	17273	0	-3.7475	0.049991	0.05	0.951953	939	0	-3.7475	1.30111
ZNF781	3	0.16491	0.31027	0.999709	5773	1	-4.048	0.049991	0.05	0.951953	940	0	-4.048	1.30111
MMP17	3	0.48962	0.64451	0.999709	12051	1	-2.644	0.049991	0.05	0.951953	941	0	-2.644	1.30111
HEMK1	3	0.10374	0.22795	0.995571	4260	1	-4.1775	0.049991	0.05	0.951953	942	0	-4.1775	1.30111
PSD2	3	0.70114	0.74874	0.999709	14032	1	-2.9144	0.049991	0.05	0.951953	943	0	-2.9144	1.30111
APRT	3	0.78498	0.80079	0.999709	14985	1	-3.697	0.049991	0.05	0.951953	944	0	-3.697	1.30111
ZFYVE26	3	0.29244	0.44496	0.999709	8338	1	-4.0221	0.049991	0.05	0.951953	945	0	-4.0221	1.30111
ADGRG2	3	0.48082	0.63584	0.999709	11879	2	-4.2428	0.049991	0.05	0.951953	946	0	-4.2428	1.30111
ANXA8	3	0.36938	0.52414	0.999709	9805	1	-3.6924	0.049991	0.05	0.951953	947	0	-3.6924	1.30111
CSNK1D	3	0.907	0.9071	0.999709	17026	0	-2.3549	0.049991	0.05	0.951953	948	0	-2.3549	1.30111
ZNF705D	3	0.96341	0.96364	0.999709	18152	0	-1.6706	0.049991	0.05	0.951953	949	0	-1.6706	1.30111
PKIA	3	0.49287	0.64777	0.999709	12116	2	-4.2267	0.05048	0.050487	0.951953	950	0	-4.2267	1.29688
CBWD6	2	0.98574	0.98559	0.999709	18600	0	-2.4581	0.050513	0.050445	0.951953	951	0	-2.4581	1.2966
UQCRHL	2	0.87015	0.86989	0.999709	16333	0	-2.9023	0.050513	0.050445	0.951953	952	0	-2.9023	1.2966
RELN	3	0.84837	0.85007	0.999709	15942	1	-2.8088	0.050532	0.050534	0.951953	953	0	-2.8088	1.29643
IL13RA1	3	0.97171	0.9719	0.999709	18314	0	-3.4915	0.050634	0.050638	0.951953	954	0	-3.4915	1.29556
OR51F1	3	0.99871	0.99875	1	18855	0	-2.6533	0.050686	0.050689	0.951953	955	0	-2.6533	1.29511
TMEM135	3	0.94406	0.94427	0.999709	17768	0	-3.7921	0.050737	0.050727	0.951953	956	0	-3.7921	1.29468
MAOA	3	0.87404	0.87418	0.999709	16389	1	-4.1333	0.050789	0.050782	0.951953	957	0	-4.1333	1.29423
ZP3	3	0.1927	0.34034	0.999709	6338	2	-4.6525	0.05084	0.050846	0.951953	958	0	-4.6525	1.29379
NTNG2	3	0.51283	0.65997	0.999709	12347	1	-2.5639	0.050892	0.050901	0.951953	959	0	-2.5639	1.29335
ZC3H6	3	0.50961	0.65867	0.999709	12324	1	-3.9416	0.050943	0.05095	0.951953	960	0	-3.9416	1.29292
TRUB1	3	0.57559	0.68648	0.999709	12869	1	-4.1228	0.050994	0.051005	0.951953	961	0	-4.1228	1.29248
HIST1H4K	3	0.077952	0.17803	0.995571	3321	2	-4.8998	0.051046	0.05106	0.951953	962	0	-4.8998	1.29204
ABHD13	3	0.32874	0.48259	0.999709	9045	2	-4.4484	0.05156	0.051565	0.951953	963	0	-4.4484	1.28769
TAAR9	3	0.90551	0.90562	0.999709	16997	0	-3.4255	0.05156	0.051565	0.951953	964	0	-3.4255	1.28769
NUDCD2	3	0.026744	0.067763	0.928212	1354	2	-5.104	0.05156	0.051565	0.951953	965	0	-5.104	1.28769
FNDC8	3	0.30636	0.45959	0.999709	8617	2	-4.2557	0.05156	0.051565	0.951953	966	0	-4.2557	1.28769
CMSS1	3	0.28784	0.4402	0.999709	8249	1	-3.9253	0.05156	0.051565	0.951953	967	0	-3.9253	1.28769
DCAF1	3	0.6793	0.73674	0.999709	13791	1	-3.3617	0.05156	0.051565	0.951953	968	0	-3.3617	1.28769
BTLA	3	0.929	0.92916	0.999709	17478	0	-3.4811	0.05156	0.051565	0.951953	969	0	-3.4811	1.28769
TBRG1	3	0.2969	0.44968	0.999709	8441	2	-4.4923	0.05156	0.051565	0.951953	970	0	-4.4923	1.28769
POTEJ	3	0.12668	0.26872	0.999709	5030	2	-4.7771	0.05156	0.051565	0.951953	971	0	-4.7771	1.28769
ZP2	3	0.0061939	0.016938	0.880817	346	2	-5.3272	0.05156	0.051565	0.951953	972	0	-5.3272	1.28769
TUBA3C	3	0.24405	0.39456	0.999709	7352	1	-2.0822	0.05156	0.051565	0.951953	973	0	-2.0822	1.28769
ZNF121	3	0.99379	0.99391	0.999709	18773	0	-2.5639	0.05156	0.051565	0.951953	974	0	-2.5639	1.28769
APOBEC3C	3	0.08523	0.1924	0.995571	3602	1	-3.6054	0.05156	0.051565	0.951953	975	0	-3.6054	1.28769
ZNF320	3	0.12508	0.26695	0.999562	5004	1	-3.8309	0.05156	0.051565	0.951953	976	0	-3.8309	1.28769
SOBP	3	0.76126	0.78506	0.999709	14694	1	-3.9495	0.05156	0.051565	0.951953	977	0	-3.9495	1.28769
EIF4A3	3	0.92015	0.92023	0.999709	17309	0	-3.4743	0.05156	0.051565	0.951953	978	0	-3.4743	1.28769
KRTAP21-1	3	0.075538	0.1731	0.995571	3238	2	-4.4894	0.05156	0.051565	0.951953	979	0	-4.4894	1.28769
RPL39	3	0.032492	0.08103	0.954745	1581	2	-5.0718	0.05156	0.051565	0.951953	980	0	-5.0718	1.28769
GNPDA2	3	0.18973	0.33711	0.999709	6271	2	-4.6573	0.05156	0.051565	0.951953	981	0	-4.6573	1.28769
STARD3	3	0.95321	0.95352	0.999709	17946	0	-3.4479	0.052202	0.052194	0.951953	982	0	-3.4479	1.28231
SPR	3	0.67772	0.73586	0.999709	13780	1	-3.8519	0.052202	0.052194	0.951953	983	0	-3.8519	1.28231
VAX2	3	0.98538	0.98554	0.999709	18592	0	-2.5539	0.052279	0.052282	0.951953	984	0	-2.5539	1.28167
OR10G7	3	0.9701	0.97027	0.999709	18276	0	-3.397	0.052331	0.052333	0.951953	985	0	-3.397	1.28124
BTN2A1	3	0.33095	0.48484	0.999709	9082	2	-4.4455	0.052382	0.052391	0.951953	986	0	-4.4455	1.28082
ZNF169	3	0.29744	0.45027	0.999709	8448	2	-4.4922	0.052433	0.052437	0.951953	987	0	-4.4922	1.2804
APOC1	3	0.51579	0.66123	0.999709	12371	1	-2.5122	0.052485	0.052486	0.951953	988	0	-2.5122	1.27996
UBA52	3	0.34587	0.50012	0.999709	9370	2	-4.3388	0.052587	0.052594	0.951953	989	0	-4.3388	1.27912
SCN4B	3	0.39805	0.55317	0.999709	10332	2	-4.3509	0.052639	0.052645	0.951953	990	0	-4.3509	1.27869
ARMC3	3	0.37585	0.53068	0.999709	9925	1	-3.4025	0.05269	0.052702	0.951953	991	0	-3.4025	1.27827
TSPO2	3	0.16722	0.31277	0.999709	5820	1	-3.5128	0.052742	0.052749	0.951953	992	0	-3.5128	1.27784
CUL5	3	0.22897	0.37865	0.999709	7069	2	-4.5935	0.052793	0.052807	0.951953	993	0	-4.5935	1.27742
DCLK3	3	0.99697	0.99701	0.999916	18829	0	-3.0173	0.052844	0.052854	0.951953	994	0	-3.0173	1.277
CBWD7	1	0.94583	0.94613	0.999709	17794	0	-2.4241	0.054167	0.054159	0.951953	995	0	-2.4241	1.26627
STK38L	2	0.73821	0.73786	0.999709	14452	1	-3.0776	0.054901	0.054846	0.951953	996	0	-3.0776	1.26042
ZFYVE1	2	0.9251	0.92493	0.999709	17403	0	-2.4968	0.054901	0.054846	0.951953	997	0	-2.4968	1.26042
USP20	2	0.023378	0.043234	0.925947	1194	1	-3.7714	0.054901	0.054846	0.951953	998	0	-3.7714	1.26042
MAD2L1BP	2	0.79437	0.79375	0.999709	15117	0	-3.0173	0.054901	0.054846	0.951953	999	0	-3.0173	1.26042
LHFPL4	3	0.98473	0.9849	0.999709	18575	0	-2.0675	0.055896	0.055953	0.951953	1000	0	-2.0675	1.25262
TLX2	3	0.056767	0.13457	0.983827	2561	1	-3.835	0.055896	0.055953	0.951953	1001	0	-3.835	1.25262
GRIN2D	3	0.99319	0.99333	0.999709	18756	0	-2.8291	0.055896	0.055953	0.951953	1002	0	-2.8291	1.25262
LRCH2	3	0.40145	0.55657	0.999709	10384	1	-3.8177	0.055896	0.055953	0.951953	1003	0	-3.8177	1.25262
SAMD4B	3	0.65935	0.72632	0.999709	13593	1	-3.6592	0.055896	0.055953	0.951953	1004	0	-3.6592	1.25262
TRAPPC4	3	0.95182	0.9521	0.999709	17924	0	-3.2645	0.055896	0.055953	0.951953	1005	0	-3.2645	1.25262
SNURF	3	0.33838	0.49248	0.999709	9224	2	-4.4346	0.055896	0.055953	0.951953	1006	0	-4.4346	1.25262
CD46	3	0.78624	0.8017	0.999709	15007	1	-4.1773	0.055896	0.055953	0.951953	1007	0	-4.1773	1.25262
SDE2	3	0.74041	0.77183	0.999709	14480	1	-2.9949	0.055896	0.055953	0.951953	1008	0	-2.9949	1.25262
AK8	3	0.90675	0.90685	0.999709	17017	0	-2.6144	0.055896	0.055953	0.951953	1009	0	-2.6144	1.25262
MAVS	3	0.087286	0.19637	0.995571	3675	1	-3.5854	0.055896	0.055953	0.951953	1010	0	-3.5854	1.25262
STEAP3	3	0.39515	0.55019	0.999709	10271	2	-4.3539	0.055896	0.055953	0.951953	1011	0	-4.3539	1.25262
SAMD10	3	0.98173	0.98189	0.999709	18518	0	-3.5958	0.055896	0.055953	0.951953	1012	0	-3.5958	1.25262
ZNF577	3	0.28113	0.4333	0.999709	8109	2	-4.5159	0.055896	0.055953	0.951953	1013	0	-4.5159	1.25262
ADGRG1	3	0.09046	0.20255	0.995571	3784	2	-4.8649	0.055896	0.055953	0.951953	1014	0	-4.8649	1.25262
POLR3F	3	0.57781	0.68745	0.999709	12885	1	-3.6252	0.055896	0.055953	0.951953	1015	0	-3.6252	1.25262
CPT1A	3	0.99537	0.99548	0.999852	18799	0	-3.1998	0.055896	0.055953	0.951953	1016	0	-3.1998	1.25262
LRP2BP	3	0.47465	0.62977	0.999709	11766	1	-2.2317	0.055896	0.055953	0.951953	1017	0	-2.2317	1.25262
GRIA2	3	0.035537	0.087923	0.958624	1703	2	-4.8692	0.055896	0.055953	0.951953	1018	0	-4.8692	1.25262
KRTAP10-7	3	0.098959	0.21885	0.995571	4096	1	-3.7963	0.055896	0.055953	0.951953	1019	0	-3.7963	1.25262
ENKD1	3	0.047083	0.11366	0.968218	2199	2	-5.0037	0.055896	0.055953	0.951953	1020	0	-5.0037	1.25262
OR13J1	3	0.88736	0.88747	0.999709	16647	0	-3.7921	0.055896	0.055953	0.951953	1021	0	-3.7921	1.25262
CASKIN1	3	0.88234	0.8824	0.999709	16542	0	-3.9648	0.055896	0.055953	0.951953	1022	0	-3.9648	1.25262
DGKE	3	0.44087	0.5961	0.999709	11119	1	-3.8976	0.055896	0.055953	0.951953	1023	0	-3.8976	1.25262
PRSS27	3	0.087712	0.19723	0.995571	3684	2	-4.429	0.055896	0.055953	0.951953	1024	0	-4.429	1.25262
WRNIP1	3	0.94934	0.94956	0.999709	17861	0	-2.4908	0.055896	0.055953	0.951953	1025	0	-2.4908	1.25262
TBCA	3	0.31734	0.47089	0.999709	8828	2	-4.4651	0.055896	0.055953	0.951953	1026	0	-4.4651	1.25262
TTC4	3	0.10444	0.22928	0.995571	4277	1	-3.6054	0.055896	0.055953	0.951953	1027	0	-3.6054	1.25262
DBF4B	3	0.51766	0.662	0.999709	12381	1	-3.9054	0.055896	0.055953	0.951953	1028	0	-3.9054	1.25262
NCAPH2	3	0.98995	0.99008	0.999709	18680	0	-2.9406	0.055896	0.055953	0.951953	1029	0	-2.9406	1.25262
KLHL18	3	0.49637	0.65127	0.999709	12191	2	-4.2204	0.055896	0.055953	0.951953	1030	0	-4.2204	1.25262
IQCF3	3	0.46276	0.61796	0.999709	11547	2	-4.2653	0.055896	0.055953	0.951953	1031	0	-4.2653	1.25262
ERBB2	3	0.71983	0.75944	0.999709	14244	1	-3.431	0.055896	0.055953	0.951953	1032	0	-3.431	1.25262
HRH4	3	0.025795	0.065515	0.928212	1312	2	-5.1108	0.055896	0.055953	0.951953	1033	0	-5.1108	1.25262
ECT2L	3	0.28566	0.43792	0.999709	8205	2	-4.5082	0.055896	0.055953	0.951953	1034	0	-4.5082	1.25262
TSR1	3	0.69032	0.74268	0.999709	13903	1	-3.4313	0.055896	0.055953	0.951953	1035	0	-3.4313	1.25262
NDUFB4	3	0.67563	0.73476	0.999709	13757	1	-3.22	0.055896	0.055953	0.951953	1036	0	-3.22	1.25262
NDUFA7	3	0.41661	0.57189	0.999709	10665	2	-3.0543	0.055896	0.055953	0.951953	1037	0	-3.0543	1.25262
PRDM1	3	0.72065	0.75992	0.999709	14252	1	-3.4084	0.055896	0.055953	0.951953	1038	0	-3.4084	1.25262
CLEC18B	3	0.022855	0.058539	0.925947	1162	2	-5.1301	0.055896	0.055953	0.951953	1039	0	-5.1301	1.25262
SCN9A	3	0.68814	0.74149	0.999709	13881	1	-3.7018	0.055896	0.055953	0.951953	1040	0	-3.7018	1.25262
LNX2	3	0.81637	0.82367	0.999709	15421	1	-2.0201	0.055896	0.055953	0.951953	1041	0	-2.0201	1.25262
NID1	3	0.85542	0.8564	0.999709	16067	1	-3.5704	0.055896	0.055953	0.951953	1042	0	-3.5704	1.25262
CHRNB2	3	0.9911	0.99121	0.999709	18707	0	-2.4132	0.055896	0.055953	0.951953	1043	0	-2.4132	1.25262
HOXB13	3	0.8189	0.82565	0.999709	15470	1	-3.9495	0.055896	0.055953	0.951953	1044	0	-3.9495	1.25262
SLC25A18	3	0.94551	0.9457	0.999709	17786	0	-2.7288	0.055896	0.055953	0.951953	1045	0	-2.7288	1.25262
CCNJL	3	0.19094	0.33844	0.999709	6300	2	-4.655	0.055896	0.055953	0.951953	1046	0	-4.655	1.25262
APCS	3	0.97954	0.97968	0.999709	18478	0	-1.8989	0.055896	0.055953	0.951953	1047	0	-1.8989	1.25262
MRPL28	3	0.26278	0.41421	0.999709	7743	2	-4.5422	0.055896	0.055953	0.951953	1048	0	-4.5422	1.25262
WNT4	3	0.56838	0.68332	0.999709	12795	1	-1.6706	0.055896	0.055953	0.951953	1049	0	-1.6706	1.25262
OCEL1	3	0.94191	0.94207	0.999709	17724	0	-3.7608	0.055896	0.055953	0.951953	1050	0	-3.7608	1.25262
CEBPA	3	0.84674	0.84865	0.999709	15910	1	-3.9093	0.055896	0.055953	0.951953	1051	0	-3.9093	1.25262
FFAR4	3	0.36343	0.51811	0.999709	9690	1	-4.1573	0.055896	0.055953	0.951953	1052	0	-4.1573	1.25262
ANAPC5	3	0.43404	0.58931	0.999709	10998	2	-4.3055	0.055896	0.055953	0.951953	1053	0	-4.3055	1.25262
LYPD1	3	0.53782	0.67035	0.999709	12556	1	-4.0838	0.055896	0.055953	0.951953	1054	0	-4.0838	1.25262
SLCO1A2	3	0.35382	0.50825	0.999709	9508	1	-1.9472	0.055896	0.055953	0.951953	1055	0	-1.9472	1.25262
XK	3	0.90133	0.90143	0.999709	16917	0	-3.7428	0.055896	0.055953	0.951953	1056	0	-3.7428	1.25262
DCSTAMP	3	0.018914	0.048933	0.925947	963	1	-3.4967	0.055896	0.055953	0.951953	1057	0	-3.4967	1.25262
ZNF626	3	0.25038	0.40122	0.999709	7491	2	-4.5607	0.055896	0.055953	0.951953	1058	0	-4.5607	1.25262
OR5B21	3	0.20703	0.35561	0.999709	6620	1	-3.0543	0.055896	0.055953	0.951953	1059	0	-3.0543	1.25262
MITD1	3	0.87921	0.87928	0.999709	16486	0	-3.8976	0.055896	0.055953	0.951953	1060	0	-3.8976	1.25262
AAMDC	3	0.82131	0.82758	0.999709	15512	1	-4.1674	0.055896	0.055953	0.951953	1061	0	-4.1674	1.25262
MICU1	3	0.37379	0.52864	0.999709	9891	2	-4.3858	0.055896	0.055953	0.951953	1062	0	-4.3858	1.25262
PIM1	3	0.7794	0.79698	0.999709	14918	1	-3.2706	0.055896	0.055953	0.951953	1063	0	-3.2706	1.25262
REG3G	3	0.93246	0.93261	0.999709	17541	0	-3.9096	0.055896	0.055953	0.951953	1064	0	-3.9096	1.25262
SLC51A	3	0.30254	0.45558	0.999709	8556	1	-4.0107	0.055896	0.055953	0.951953	1065	0	-4.0107	1.25262
C10orf142	3	0.70436	0.75057	0.999709	14070	1	-2.9248	0.055896	0.055953	0.951953	1066	0	-2.9248	1.25262
PRPF19	3	0.20534	0.35383	0.999709	6584	1	-4.1019	0.055896	0.055953	0.951953	1067	0	-4.1019	1.25262
HMOX2	3	0.72232	0.76093	0.999709	14269	1	-3.22	0.055896	0.055953	0.951953	1068	0	-3.22	1.25262
SLC25A28	3	0.77589	0.79462	0.999709	14866	1	-2.9876	0.055896	0.055953	0.951953	1069	0	-2.9876	1.25262
CCDC154	3	0.46045	0.61564	0.999709	11491	2	-4.2683	0.055896	0.055953	0.951953	1070	0	-4.2683	1.25262
AKAP9	3	0.27438	0.42625	0.999709	7980	1	-3.3914	0.055896	0.055953	0.951953	1071	0	-3.3914	1.25262
TOX3	3	0.87684	0.87691	0.999709	16433	0	-3.431	0.055896	0.055953	0.951953	1072	0	-3.431	1.25262
MMP12	3	0.74996	0.7778	0.999709	14583	1	-3.3617	0.055896	0.055953	0.951953	1073	0	-3.3617	1.25262
ENPP5	3	0.23524	0.38529	0.999709	7181	1	-3.6105	0.055896	0.055953	0.951953	1074	0	-3.6105	1.25262
KLHL8	3	0.28972	0.44218	0.999709	8278	2	-4.5029	0.055896	0.055953	0.951953	1075	0	-4.5029	1.25262
RAPGEF2	3	0.77589	0.79462	0.999709	14868	1	-3.5132	0.055896	0.055953	0.951953	1076	0	-3.5132	1.25262
SUPT16H	3	0.83893	0.84193	0.999709	15798	1	-2.5448	0.055896	0.055953	0.951953	1077	0	-2.5448	1.25262
GNB3	3	0.88418	0.88424	0.999709	16579	0	-2.4241	0.055896	0.055953	0.951953	1078	0	-2.4241	1.25262
LRRC2	3	0.84884	0.85049	0.999709	15950	1	-2.0822	0.055896	0.055953	0.951953	1079	0	-2.0822	1.25262
SLC9A4	3	0.11934	0.25667	0.995571	4813	1	-3.9452	0.055896	0.055953	0.951953	1080	0	-3.9452	1.25262
ANKS1A	3	0.32947	0.4833	0.999709	9059	2	-4.4482	0.055896	0.055953	0.951953	1081	0	-4.4482	1.25262
IFNA14	3	0.82131	0.82758	0.999709	15510	1	-2.6048	0.055896	0.055953	0.951953	1082	0	-2.6048	1.25262
HLTF	3	0.42919	0.5845	0.999709	10923	1	-2.6048	0.055896	0.055953	0.951953	1083	0	-2.6048	1.25262
OR4C11	3	0.24544	0.39601	0.999709	7389	1	-3.8892	0.055896	0.055953	0.951953	1084	0	-3.8892	1.25262
SELENOT	3	0.52478	0.66486	0.999709	12444	1	-1.8809	0.055896	0.055953	0.951953	1085	0	-1.8809	1.25262
CST2	3	0.52263	0.664	0.999709	12423	1	-3.7656	0.055896	0.055953	0.951953	1086	0	-3.7656	1.25262
GPR141	3	0.94865	0.94886	0.999709	17845	0	-1.695	0.055896	0.055953	0.951953	1087	0	-1.695	1.25262
EIF6	3	0.88367	0.88374	0.999709	16567	0	-4.0623	0.055896	0.055953	0.951953	1088	0	-4.0623	1.25262
ZFP41	3	0.16661	0.31211	0.999709	5807	1	-3.9416	0.055896	0.055953	0.951953	1089	0	-3.9416	1.25262
VWA5A	3	0.94729	0.94752	0.999709	17822	0	-3.4367	0.055896	0.055953	0.951953	1090	0	-3.4367	1.25262
PIK3CD	3	0.35595	0.51045	0.999709	9546	2	-4.4117	0.055896	0.055953	0.951953	1091	0	-4.4117	1.25262
AMPD1	3	0.22973	0.37942	0.999709	7084	1	-4.073	0.055896	0.055953	0.951953	1092	0	-4.073	1.25262
ADH6	3	0.17047	0.31626	0.999709	5883	2	-4.5264	0.055896	0.055953	0.951953	1093	0	-4.5264	1.25262
GCM1	3	0.30857	0.4619	0.999709	8665	1	-3.6057	0.055896	0.055953	0.951953	1094	0	-3.6057	1.25262
RPF1	3	0.93413	0.9343	0.999709	17576	0	-3.6204	0.055896	0.055953	0.951953	1095	0	-3.6204	1.25262
GIPC1	3	0.39971	0.55484	0.999709	10350	1	-2.5639	0.055896	0.055953	0.951953	1096	0	-2.5639	1.25262
CLCA4	3	0.52161	0.66358	0.999709	12411	1	-4.0182	0.055896	0.055953	0.951953	1097	0	-4.0182	1.25262
KRTAP3-3	3	0.80024	0.81162	0.999709	15200	1	-3.0326	0.055896	0.055953	0.951953	1098	0	-3.0326	1.25262
MAP3K7CL	3	0.18613	0.33325	0.999709	6205	2	-4.6644	0.055896	0.055953	0.951953	1099	0	-4.6644	1.25262
ZNF131	3	0.045607	0.11044	0.962571	2148	2	-5.011	0.055896	0.055953	0.951953	1100	0	-5.011	1.25262
CMC2	3	0.63336	0.71343	0.999709	13347	1	-4.2105	0.055896	0.055953	0.951953	1101	0	-4.2105	1.25262
ZNF479	3	0.81445	0.82215	0.999709	15394	1	-3.5955	0.055896	0.055953	0.951953	1102	0	-3.5955	1.25262
ADAM28	3	0.87366	0.8738	0.999709	16385	1	-3.4425	0.055896	0.055953	0.951953	1103	0	-3.4425	1.25262
POU6F2	3	0.41632	0.57162	0.999709	10658	2	-4.2525	0.055896	0.055953	0.951953	1104	0	-4.2525	1.25262
NEUROD4	3	0.9186	0.91868	0.999709	17274	0	-2.2441	0.055896	0.055953	0.951953	1105	0	-2.2441	1.25262
TM6SF1	3	0.78695	0.80222	0.999709	15018	1	-2.4241	0.055896	0.055953	0.951953	1106	0	-2.4241	1.25262
KRTAP9-2	3	0.65581	0.72455	0.999709	13561	1	-3.9454	0.055896	0.055953	0.951953	1107	0	-3.9454	1.25262
RSC1A1	3	0.90591	0.90602	0.999709	17003	0	-3.3384	0.055896	0.055953	0.951953	1108	0	-3.3384	1.25262
EGFL7	3	0.78164	0.79849	0.999709	14949	1	-4.1807	0.055896	0.055953	0.951953	1109	0	-4.1807	1.25262
LTBP4	3	0.12537	0.26729	0.999562	5010	2	-4.7793	0.055896	0.055953	0.951953	1110	0	-4.7793	1.25262
LRP5	2	0.97731	0.97717	0.999709	18430	0	-2.5737	0.057522	0.057448	0.955432	1111	0	-2.5737	1.24017
CYP4F3	3	0.89032	0.89038	0.999709	16696	0	-3.6399	0.058942	0.058959	0.955432	1112	0	-3.6399	1.22958
LIPJ	3	0.67772	0.73586	0.999709	13784	1	-3.7878	0.058993	0.059005	0.955432	1113	0	-3.7878	1.2292
CEP164	3	0.62547	0.70958	0.999709	13292	1	-1.8989	0.059044	0.05906	0.955432	1114	0	-1.8989	1.22882
MOGAT1	3	0.90015	0.90028	0.999709	16888	0	-4.1226	0.059095	0.059105	0.955432	1115	0	-4.1226	1.22845
IPO11	3	0.098601	0.21819	0.995571	4083	2	-4.8418	0.059146	0.059161	0.955432	1116	0	-4.8418	1.22807
SLC1A3	3	0.97488	0.97505	0.999709	18380	0	-2.5945	0.059198	0.059214	0.955432	1117	0	-2.5945	1.22769
THRAP3	3	0.10541	0.23113	0.995571	4307	2	-4.8249	0.059249	0.059263	0.955432	1118	0	-4.8249	1.22732
CLEC9A	3	0.17163	0.3175	0.999709	5905	2	-4.6905	0.0593	0.059326	0.955432	1119	0	-4.6905	1.22695
ROCK1	3	0.99341	0.99354	0.999709	18764	0	-2.7469	0.059351	0.059387	0.955432	1120	0	-2.7469	1.22657
BACH1	3	0.79461	0.80761	0.999709	15122	1	-4.0442	0.059453	0.059492	0.955432	1121	0	-4.0442	1.22583
NFATC3	3	0.88054	0.88059	0.999709	16510	0	-3.8307	0.059504	0.059546	0.955432	1122	0	-3.8307	1.22545
MRPL47	2	0.45123	0.50908	0.999709	11328	1	-3.3542	0.060276	0.06017	0.955432	1123	0	-3.3542	1.21986
RDH5	3	0.98556	0.98569	0.999709	18599	0	-3.5077	0.061267	0.061251	0.955432	1124	0	-3.5077	1.21277
KCNH8	3	0.99756	0.99759	1	18838	0	-2.3905	0.061267	0.061251	0.955432	1125	0	-2.3905	1.21277
DEPDC5	3	0.41187	0.5671	0.999709	10569	2	-4.333	0.061267	0.061251	0.955432	1126	0	-4.333	1.21277
FAM217A	3	0.87366	0.8738	0.999709	16384	1	-2.3311	0.061267	0.061251	0.955432	1127	0	-2.3311	1.21277
FXR2	3	0.066998	0.15579	0.990289	2937	1	-2.7288	0.061267	0.061251	0.955432	1128	0	-2.7288	1.21277
KRTAP19-8	3	0.9585	0.95876	0.999709	18053	0	-3.5906	0.061267	0.061251	0.955432	1129	0	-3.5906	1.21277
NKX2-6	3	0.035277	0.087361	0.958624	1691	1	-3.8309	0.061267	0.061251	0.955432	1130	0	-3.8309	1.21277
HAPLN4	3	0.80055	0.81183	0.999709	15208	1	-3.8309	0.061267	0.061251	0.955432	1131	0	-3.8309	1.21277
ZPR1	3	0.89118	0.89127	0.999709	16718	0	-2.901	0.061267	0.061251	0.955432	1132	0	-2.901	1.21277
ESAM	3	0.83766	0.84086	0.999709	15768	1	-3.9297	0.061267	0.061251	0.955432	1133	0	-3.9297	1.21277
ETFRF1	3	0.49458	0.6495	0.999709	12147	2	-4.2235	0.061267	0.061251	0.955432	1134	0	-4.2235	1.21277
LCN10	3	0.73117	0.76621	0.999709	14371	1	-2.5224	0.061267	0.061251	0.955432	1135	0	-2.5224	1.21277
HNRNPU	3	0.91472	0.9148	0.999709	17195	0	-4.0333	0.061267	0.061251	0.955432	1136	0	-4.0333	1.21277
FUNDC1	3	0.65914	0.72621	0.999709	13590	1	-3.9176	0.061267	0.061251	0.955432	1137	0	-3.9176	1.21277
ZNF609	3	0.65023	0.72172	0.999709	13504	1	-3.6496	0.061267	0.061251	0.955432	1138	0	-3.6496	1.21277
NUDT7	3	0.47025	0.6254	0.999709	11692	2	-4.2557	0.061267	0.061251	0.955432	1139	0	-4.2557	1.21277
PTH2	3	0.82579	0.8311	0.999709	15579	1	-3.1395	0.061267	0.061251	0.955432	1140	0	-3.1395	1.21277
TRIM58	3	0.97201	0.9722	0.999709	18322	0	-3.3621	0.061267	0.061251	0.955432	1141	0	-3.3621	1.21277
LARS	3	0.74682	0.77582	0.999709	14546	1	-3.025	0.061267	0.061251	0.955432	1142	0	-3.025	1.21277
GPATCH2	3	0.54904	0.67504	0.999709	12641	1	-4.1123	0.061267	0.061251	0.955432	1143	0	-4.1123	1.21277
RBBP6	3	0.34887	0.50312	0.999709	9425	2	-4.4203	0.061267	0.061251	0.955432	1144	0	-4.4203	1.21277
CABS1	3	0.26047	0.4118	0.999709	7693	1	-3.0618	0.061267	0.061251	0.955432	1145	0	-3.0618	1.21277
OR5I1	3	0.9186	0.91868	0.999709	17279	0	-4.0182	0.061267	0.061251	0.955432	1146	0	-4.0182	1.21277
COLEC10	3	0.97848	0.97864	0.999709	18450	0	-3.6252	0.061267	0.061251	0.955432	1147	0	-3.6252	1.21277
UBE2H	3	0.90805	0.90814	0.999709	17048	0	-4.0697	0.061267	0.061251	0.955432	1148	0	-4.0697	1.21277
IL22RA1	3	0.58948	0.6927	0.999709	12990	1	-3.1114	0.061267	0.061251	0.955432	1149	0	-3.1114	1.21277
CTSZ	3	0.82056	0.82699	0.999709	15493	1	-3.4367	0.061267	0.061251	0.955432	1150	0	-3.4367	1.21277
DRD1	3	0.4228	0.57818	0.999709	10783	1	-4.1974	0.061267	0.061251	0.955432	1151	0	-4.1974	1.21277
CHMP1A	3	0.63457	0.71403	0.999709	13356	1	-4.1437	0.061267	0.061251	0.955432	1152	0	-4.1437	1.21277
CA6	3	0.93127	0.9314	0.999709	17520	0	-2.634	0.061267	0.061251	0.955432	1153	0	-2.634	1.21277
SOWAHA	3	0.40272	0.5579	0.999709	10401	2	-4.3449	0.061267	0.061251	0.955432	1154	0	-4.3449	1.21277
BTN3A1	3	0.25228	0.40321	0.999709	7524	1	-2.2694	0.061267	0.061251	0.955432	1155	0	-2.2694	1.21277
HSD17B8	3	0.058021	0.13722	0.985438	2607	1	-3.801	0.061267	0.061251	0.955432	1156	0	-3.801	1.21277
MANSC4	3	0.57183	0.6848	0.999709	12829	1	-3.6545	0.061267	0.061251	0.955432	1157	0	-3.6545	1.21277
GLRB	3	0.95705	0.95733	0.999709	18020	0	-3.6687	0.061267	0.061251	0.955432	1158	0	-3.6687	1.21277
PEMT	3	0.79917	0.81087	0.999709	15189	1	-3.1258	0.061267	0.061251	0.955432	1159	0	-3.1258	1.21277
E2F1	3	0.9304	0.93053	0.999709	17505	0	-3.2645	0.061267	0.061251	0.955432	1160	0	-3.2645	1.21277
C4orf3	3	0.52174	0.66363	0.999709	12412	1	-3.4698	0.061267	0.061251	0.955432	1161	0	-3.4698	1.21277
CTTNBP2NL	3	0.89032	0.89038	0.999709	16701	0	-3.1114	0.061267	0.061251	0.955432	1162	0	-3.1114	1.21277
LRP10	3	0.060169	0.14175	0.987355	2685	1	-2.0086	0.061267	0.061251	0.955432	1163	0	-2.0086	1.21277
NDUFS7	3	0.29883	0.45168	0.999709	8477	1	-3.9096	0.061267	0.061251	0.955432	1164	0	-3.9096	1.21277
GOLIM4	3	0.9394	0.93962	0.999709	17676	0	-2.3671	0.061267	0.061251	0.955432	1165	0	-2.3671	1.21277
PIK3CG	3	0.20212	0.35038	0.999709	6521	2	-4.4286	0.061267	0.061251	0.955432	1166	0	-4.4286	1.21277
CCNE2	3	0.13258	0.27527	0.999709	5149	1	-3.957	0.061267	0.061251	0.955432	1167	0	-3.957	1.21277
PDE9A	3	0.73044	0.76577	0.999709	14361	1	-2.2183	0.061267	0.061251	0.955432	1168	0	-2.2183	1.21277
TGDS	3	0.48596	0.64092	0.999709	11971	1	-4.1805	0.061267	0.061251	0.955432	1169	0	-4.1805	1.21277
KIF4B	3	0.98609	0.98624	0.999709	18607	0	-3.3621	0.061267	0.061251	0.955432	1170	0	-3.3621	1.21277
DGAT1	3	0.91178	0.91189	0.999709	17118	0	-4.0732	0.061267	0.061251	0.955432	1171	0	-4.0732	1.21277
MAGEB6	3	0.42049	0.57585	0.999709	10735	1	-3.2002	0.061267	0.061251	0.955432	1172	0	-3.2002	1.21277
C1orf131	3	0.42112	0.57649	0.999709	10749	1	-2.2441	0.061267	0.061251	0.955432	1173	0	-2.2441	1.21277
ARHGEF6	3	0.5888	0.69238	0.999709	12980	1	-3.734	0.061267	0.061251	0.955432	1174	0	-3.734	1.21277
NAPSA	3	0.86828	0.86845	0.999709	16291	1	-3.7158	0.061267	0.061251	0.955432	1175	0	-3.7158	1.21277
ATP4B	3	0.9834	0.98355	0.999709	18547	0	-2.8083	0.061267	0.061251	0.955432	1176	0	-2.8083	1.21277
FAM184A	3	0.99202	0.99214	0.999709	18725	0	-3.3021	0.061267	0.061251	0.955432	1177	0	-3.3021	1.21277
CFLAR	3	0.31042	0.4638	0.999709	8692	1	-3.5234	0.061267	0.061251	0.955432	1178	0	-3.5234	1.21277
GLRA1	3	0.3488	0.50306	0.999709	9421	1	-2.096	0.061267	0.061251	0.955432	1179	0	-2.096	1.21277
NANP	3	0.28825	0.4406	0.999709	8264	1	-3.5652	0.061267	0.061251	0.955432	1180	0	-3.5652	1.21277
TTC21A	3	0.88331	0.88338	0.999709	16563	0	-3.9492	0.061267	0.061251	0.955432	1181	0	-3.9492	1.21277
PTH1R	3	0.47619	0.6313	0.999709	11793	2	-4.2492	0.061267	0.061251	0.955432	1182	0	-4.2492	1.21277
SEMA4G	3	0.76006	0.78428	0.999709	14682	1	-4.1974	0.061267	0.061251	0.955432	1183	0	-4.1974	1.21277
GAPDH	3	0.77997	0.79736	0.999709	14929	1	-1.8989	0.061267	0.061251	0.955432	1184	0	-1.8989	1.21277
HCFC2	3	0.43252	0.58779	0.999709	10978	2	-3.1633	0.061267	0.061251	0.955432	1185	0	-3.1633	1.21277
GAD1	3	0.57183	0.6848	0.999709	12824	1	-3.5805	0.061267	0.061251	0.955432	1186	0	-3.5805	1.21277
B3GNT3	3	0.88951	0.88956	0.999709	16679	0	-2.3911	0.061267	0.061251	0.955432	1187	0	-2.3911	1.21277
GRM8	3	0.37284	0.52768	0.999709	9871	2	-4.386	0.061267	0.061251	0.955432	1188	0	-4.386	1.21277
LRRC37A	1	0.93775	0.93807	0.999709	17642	0	-2.5332	0.062252	0.062258	0.955432	1189	0	-2.5332	1.20585
VTA1	3	0.93383	0.934	0.999709	17567	0	-2.985	0.063027	0.062978	0.955432	1190	0	-2.985	1.20047
ZNF536	3	0.30065	0.45363	0.999709	8519	1	-2.4014	0.063128	0.063077	0.955432	1191	0	-2.4014	1.19978
CHD1	3	0.13277	0.27549	0.999709	5152	2	-4.7658	0.063179	0.063124	0.955432	1192	0	-4.7658	1.19943
OR9Q2	3	0.6515	0.72234	0.999709	13514	1	-3.1667	0.063281	0.063217	0.955432	1193	0	-3.1667	1.19873
TMEM11	3	0.43888	0.59413	0.999709	11079	1	-2.5241	0.063332	0.06327	0.955432	1194	0	-2.5241	1.19838
FSBP	3	0.97913	0.97929	0.999709	18468	0	-3.5022	0.063409	0.063345	0.955432	1195	0	-3.5022	1.19785
ANKRD44	3	0.63608	0.71477	0.999709	13371	1	-3.969	0.063485	0.063409	0.955432	1196	0	-3.969	1.19733
GLI3	3	0.67634	0.73512	0.999709	13760	1	-4.191	0.064402	0.064266	0.955432	1197	0	-4.191	1.1911
THUMPD2	3	0.97201	0.9722	0.999709	18320	0	-3.3621	0.064402	0.064266	0.955432	1198	0	-3.3621	1.1911
AGTR1	3	0.2874	0.43973	0.999709	8244	1	-2.9563	0.064402	0.064266	0.955432	1199	0	-2.9563	1.1911
2021-03-08	3	0.4492	0.60433	0.999709	11292	2	-4.284	0.064402	0.064266	0.955432	1200	0	-4.284	1.1911
OR8B2	3	0.77414	0.79347	0.999709	14842	1	-4.0292	0.064402	0.064266	0.955432	1201	0	-4.0292	1.1911
FOLR1	3	0.43737	0.59263	0.999709	11058	1	-3.9492	0.064402	0.064266	0.955432	1202	0	-3.9492	1.1911
EBF1	3	0.84438	0.84662	0.999709	15876	1	-4.1472	0.064402	0.064266	0.955432	1203	0	-4.1472	1.1911
RIOK3	3	0.066666	0.15511	0.990251	2928	2	-4.9339	0.064402	0.064266	0.955432	1204	0	-4.9339	1.1911
SPATA5L1	3	0.95956	0.95981	0.999709	18074	0	-3.6352	0.064402	0.064266	0.955432	1205	0	-3.6352	1.1911
GJD4	3	0.13614	0.27917	0.999709	5225	1	-4.0769	0.064402	0.064266	0.955432	1206	0	-4.0769	1.1911
RGS9	3	0.98456	0.98473	0.999709	18572	0	-2.574	0.064402	0.064266	0.955432	1207	0	-2.574	1.1911
SCRN3	3	0.0723	0.16659	0.995571	3123	2	-4.5318	0.064402	0.064266	0.955432	1208	0	-4.5318	1.1911
HSDL1	3	0.76771	0.78922	0.999709	14768	1	-3.5496	0.064402	0.064266	0.955432	1209	0	-3.5496	1.1911
ASB17	3	0.64361	0.71847	0.999709	13442	1	-4.1674	0.064402	0.064266	0.955432	1210	0	-4.1674	1.1911
VCL	3	0.021209	0.054567	0.925947	1085	2	-5.1423	0.064402	0.064266	0.955432	1211	0	-5.1423	1.1911
GALE	3	0.87227	0.87242	0.999709	16357	1	-4.2072	0.064402	0.064266	0.955432	1212	0	-4.2072	1.1911
MAP3K4	3	0.91928	0.91936	0.999709	17288	0	-2.9876	0.064402	0.064266	0.955432	1213	0	-2.9876	1.1911
ASTE1	3	0.2767	0.42872	0.999709	8026	2	-4.5213	0.064402	0.064266	0.955432	1214	0	-4.5213	1.1911
TTLL12	3	0.25891	0.4102	0.999709	7662	2	-4.5476	0.064402	0.064266	0.955432	1215	0	-4.5476	1.1911
CPN1	3	0.87828	0.87839	0.999709	16458	0	-3.397	0.064402	0.064266	0.955432	1216	0	-3.397	1.1911
SHROOM2	3	0.6793	0.73674	0.999709	13794	1	-3.3017	0.064402	0.064266	0.955432	1217	0	-3.3017	1.1911
MAML1	3	0.51283	0.65997	0.999709	12346	1	-4.1019	0.064402	0.064266	0.955432	1218	0	-4.1019	1.1911
PTTG1IP	3	0.077128	0.17633	0.995571	3295	2	-4.7925	0.064402	0.064266	0.955432	1219	0	-4.7925	1.1911
TENM3	3	0.77825	0.79622	0.999709	14903	1	-4.1193	0.064402	0.064266	0.955432	1220	0	-4.1193	1.1911
CD5L	3	0.99267	0.99279	0.999709	18739	0	-1.7631	0.064402	0.064266	0.955432	1221	0	-1.7631	1.1911
TIMP3	3	0.97828	0.97844	0.999709	18449	0	-3.6831	0.064402	0.064266	0.955432	1222	0	-3.6831	1.1911
GPR25	3	0.69505	0.7453	0.999709	13953	1	-4.2105	0.064402	0.064266	0.955432	1223	0	-4.2105	1.1911
OTOP3	3	0.99911	0.99912	1	18862	0	-2.4357	0.064402	0.064266	0.955432	1224	0	-2.4357	1.1911
IGSF5	3	0.99324	0.99339	0.999709	18757	0	-3.2196	0.064402	0.064266	0.955432	1225	0	-3.2196	1.1911
KLF12	3	0.95766	0.95793	0.999709	18033	0	-3.2065	0.064402	0.064266	0.955432	1226	0	-3.2065	1.1911
STARD13	3	0.99631	0.99637	0.999916	18815	0	-2.6048	0.064402	0.064266	0.955432	1227	0	-2.6048	1.1911
ZNF512	3	0.22892	0.37861	0.999709	7066	1	-3.7656	0.064402	0.064266	0.955432	1228	0	-3.7656	1.1911
IFNGR2	3	0.33353	0.48746	0.999709	9138	2	-4.4427	0.064402	0.064266	0.955432	1229	0	-4.4427	1.1911
SERINC2	3	0.013516	0.035574	0.925947	710	2	-4.5499	0.064402	0.064266	0.955432	1230	0	-4.5499	1.1911
RASA4B	2	0.25205	0.38499	0.999709	7521	1	-3.5382	0.064556	0.06446	0.955432	1231	0	-3.5382	1.19006
GPRC5D	2	0.81149	0.81096	0.999709	15357	0	-3.0778	0.064556	0.06446	0.955432	1232	0	-3.0778	1.19006
VAT1	3	0.67026	0.73193	0.999709	13700	1	-3.277	0.065319	0.065195	0.955432	1233	0	-3.277	1.18496
MDGA1	3	0.2514	0.40228	0.999709	7508	1	-3.1598	0.06537	0.06525	0.955432	1234	0	-3.1598	1.18462
KRTAP5-2	3	0.4374	0.59266	0.999709	11059	2	-4.2995	0.065421	0.065305	0.955432	1235	0	-4.2995	1.18428
ST8SIA5	3	0.93509	0.93527	0.999709	17602	0	-3.3442	0.065522	0.065415	0.955432	1236	0	-3.3442	1.18361
MS4A18	3	0.81053	0.81916	0.999709	15344	1	-3.9767	0.065573	0.065463	0.955432	1237	0	-3.9767	1.18327
ST6GALNAC1	2	0.70397	0.70553	0.999709	14061	1	-3.1299	0.066186	0.066075	0.955432	1238	0	-3.1299	1.17923
RBL2	3	0.73592	0.7691	0.999709	14423	1	-4.204	0.066235	0.066114	0.955432	1239	0	-4.204	1.17891
LURAP1L	3	0.355	0.50946	0.999709	9535	2	-4.4119	0.066235	0.066114	0.955432	1240	0	-4.4119	1.17891
INSC	3	0.15502	0.29958	0.999709	5591	2	-4.7229	0.066235	0.066114	0.955432	1241	0	-4.7229	1.17891
ZNF37A	3	0.02866	0.072234	0.942081	1433	1	-1.8326	0.066235	0.066114	0.955432	1242	0	-1.8326	1.17891
FSD1	3	0.91222	0.91233	0.999709	17128	0	-3.2958	0.066235	0.066114	0.955432	1243	0	-3.2958	1.17891
TMEM144	3	0.46658	0.62175	0.999709	11612	2	-4.2618	0.066235	0.066114	0.955432	1244	0	-4.2618	1.17891
OR10H1	3	0.77173	0.79189	0.999709	14814	1	-3.8519	0.066235	0.066114	0.955432	1245	0	-3.8519	1.17891
RUFY2	3	0.28666	0.43898	0.999709	8225	2	-4.5079	0.066235	0.066114	0.955432	1246	0	-4.5079	1.17891
VWC2	3	0.40861	0.56384	0.999709	10513	2	-4.3388	0.066235	0.066114	0.955432	1247	0	-4.3388	1.17891
MIOS	3	0.71697	0.75776	0.999709	14210	1	-2.8511	0.066235	0.066114	0.955432	1248	0	-2.8511	1.17891
NDUFAF8	3	0.4011	0.55621	0.999709	10370	2	-4.3478	0.066235	0.066114	0.955432	1249	0	-4.3478	1.17891
RWDD2B	3	0.97389	0.97406	0.999709	18362	0	-3.1435	0.066235	0.066114	0.955432	1250	0	-3.1435	1.17891
TMEM126B	3	0.025962	0.065903	0.928212	1320	2	-5.1092	0.066235	0.066114	0.955432	1251	0	-5.1092	1.17891
STX19	3	0.3692	0.52396	0.999709	9801	1	-3.3322	0.066235	0.066114	0.955432	1252	0	-3.3322	1.17891
OR10H4	3	0.50878	0.65833	0.999709	12316	1	-3.4364	0.066235	0.066114	0.955432	1253	0	-3.4364	1.17891
ZNFX1	3	0.057714	0.13654	0.984546	2598	2	-4.9635	0.066235	0.066114	0.955432	1254	0	-4.9635	1.17891
AMZ2	3	0.10347	0.22741	0.995571	4253	1	-3.3442	0.066235	0.066114	0.955432	1255	0	-3.3442	1.17891
HTRA2	3	0.35551	0.50999	0.999709	9542	1	-4.0292	0.066235	0.066114	0.955432	1256	0	-4.0292	1.17891
SREK1IP1	3	0.56178	0.68042	0.999709	12739	1	-3.6496	0.066235	0.066114	0.955432	1257	0	-3.6496	1.17891
C19orf68	3	0.48178	0.63681	0.999709	11888	1	-3.4197	0.066235	0.066114	0.955432	1258	0	-3.4197	1.17891
COPS9	3	0.77891	0.79665	0.999709	14910	1	-3.5652	0.066235	0.066114	0.955432	1259	0	-3.5652	1.17891
NAMPT	3	0.92471	0.92481	0.999709	17389	0	-3.391	0.066235	0.066114	0.955432	1260	0	-3.391	1.17891
ANKRD45	3	0.90591	0.90602	0.999709	17000	0	-3.8892	0.066235	0.066114	0.955432	1261	0	-3.8892	1.17891
EFCAB2	3	0.98703	0.98717	0.999709	18629	0	-1.9155	0.066235	0.066114	0.955432	1262	0	-1.9155	1.17891
FBP1	3	0.43797	0.59322	0.999709	11066	1	-4.0841	0.066235	0.066114	0.955432	1263	0	-4.0841	1.17891
SLC35B1	3	0.71422	0.75616	0.999709	14182	1	-3.2457	0.066896	0.066749	0.955432	1264	0	-3.2457	1.1746
PCDHB11	3	0.39195	0.54699	0.999709	10216	2	-4.2204	0.066947	0.066803	0.955432	1265	0	-4.2204	1.17427
C1QTNF1	3	0.068679	0.15921	0.991643	2993	2	-4.928	0.066998	0.066867	0.955432	1266	0	-4.928	1.17394
RBM15B	3	0.83543	0.83896	0.999709	15737	1	-3.5077	0.067048	0.066921	0.955432	1267	0	-3.5077	1.17361
FBXO30	3	0.2514	0.40228	0.999709	7506	1	-3.7294	0.067099	0.066963	0.955432	1268	0	-3.7294	1.17328
TMEM177	3	0.41991	0.57524	0.999709	10723	2	-4.3237	0.06715	0.067025	0.955432	1269	0	-4.3237	1.17295
ZSCAN23	3	0.64748	0.72035	0.999709	13477	1	-3.4642	0.067201	0.067073	0.955432	1270	0	-3.4642	1.17262
RPS6KB2	3	0.14563	0.28946	0.999709	5423	2	-4.1438	0.067303	0.067164	0.955432	1271	0	-4.1438	1.17197
ALPPL2	3	0.39055	0.54557	0.999709	10187	1	-4.1606	0.067353	0.06722	0.955432	1272	0	-4.1606	1.17164
HERC3	3	0.34528	0.49956	0.999709	9362	2	-4.4259	0.067404	0.067268	0.955432	1273	0	-4.4259	1.17131
TEKT5	3	0.97406	0.97423	0.999709	18365	0	-3.271	0.067455	0.067327	0.955432	1274	0	-3.271	1.17099
VLDLR	3	0.99839	0.99843	1	18850	0	-2.2694	0.068166	0.067989	0.955432	1275	0	-2.2694	1.16643
AADAC	3	0.60548	0.70011	0.999709	13128	1	-2.8511	0.068166	0.067989	0.955432	1276	0	-2.8511	1.16643
NDUFS8	3	0.97171	0.9719	0.999709	18316	0	-3.1667	0.068166	0.067989	0.955432	1277	0	-3.1667	1.16643
SMURF1	3	0.43073	0.58602	0.999709	10945	2	-4.3086	0.068166	0.067989	0.955432	1278	0	-4.3086	1.16643
NIPSNAP3B	3	0.21285	0.36173	0.999709	6742	1	-3.6057	0.068166	0.067989	0.955432	1279	0	-3.6057	1.16643
SORBS3	3	0.92218	0.92228	0.999709	17340	0	-3.4698	0.068166	0.067989	0.955432	1280	0	-3.4698	1.16643
NDUFAF7	3	0.30428	0.45741	0.999709	8581	2	-4.3598	0.068166	0.067989	0.955432	1281	0	-4.3598	1.16643
TSPAN12	3	0.96074	0.96103	0.999709	18101	0	-3.4863	0.068166	0.067989	0.955432	1282	0	-3.4863	1.16643
OR2W1	3	0.77235	0.7923	0.999709	14826	1	-3.5025	0.068166	0.067989	0.955432	1283	0	-3.5025	1.16643
MIER3	3	0.78743	0.80259	0.999709	15025	1	-3.391	0.068166	0.067989	0.955432	1284	0	-3.391	1.16643
TWNK	3	0.18268	0.32951	0.999709	6137	1	-3.7699	0.068166	0.067989	0.955432	1285	0	-3.7699	1.16643
ACMSD	3	0.85752	0.85827	0.999709	16096	1	-3.3442	0.068166	0.067989	0.955432	1286	0	-3.3442	1.16643
NEFH	3	0.40592	0.56114	0.999709	10463	2	-4.3206	0.068166	0.067989	0.955432	1287	0	-4.3206	1.16643
GHRL	3	0.50622	0.65732	0.999709	12300	1	-3.3143	0.068166	0.067989	0.955432	1288	0	-3.3143	1.16643
ENTHD1	3	0.97435	0.97454	0.999709	18375	0	-3.3854	0.068166	0.067989	0.955432	1289	0	-3.3854	1.16643
WDR11	3	0.68584	0.74023	0.999709	13857	1	-1.8989	0.068166	0.067989	0.955432	1290	0	-1.8989	1.16643
ST18	3	0.90976	0.90988	0.999709	17083	0	-3.7654	0.068166	0.067989	0.955432	1291	0	-3.7654	1.16643
SHOX	3	0.48596	0.64092	0.999709	11974	1	-3.965	0.068166	0.067989	0.955432	1292	0	-3.965	1.16643
FGD1	3	0.19939	0.3474	0.999709	6464	1	-3.01	0.068166	0.067989	0.955432	1293	0	-3.01	1.16643
ROS1	3	0.55848	0.67902	0.999709	12713	1	-3.8973	0.068166	0.067989	0.955432	1294	0	-3.8973	1.16643
ELN	3	0.2457	0.39626	0.999709	7398	1	-3.1532	0.068166	0.067989	0.955432	1295	0	-3.1532	1.16643
GCN1	3	0.91574	0.9158	0.999709	17217	0	-3.6449	0.068166	0.067989	0.955432	1296	0	-3.6449	1.16643
DHX29	2	0.17473	0.28109	0.999709	5972	1	-3.6104	0.068722	0.068674	0.955432	1297	0	-3.6104	1.1629
TMEM173	2	0.85527	0.85495	0.999709	16065	0	-3.0265	0.068722	0.068674	0.955432	1298	0	-3.0265	1.1629
CHKA	2	0.3948	0.47186	0.999709	10262	1	-3.4375	0.068722	0.068674	0.955432	1299	0	-3.4375	1.1629
BLOC1S5	3	0.71852	0.75868	0.999709	14231	1	-3.5602	0.068877	0.068697	0.955432	1300	0	-3.5602	1.16193
CPNE8	3	0.80675	0.81631	0.999709	15289	1	-3.5903	0.068928	0.068739	0.955432	1301	0	-3.5903	1.1616
MPG	3	0.15274	0.29713	0.999709	5549	2	-4.3868	0.068979	0.068786	0.955432	1302	0	-4.3868	1.16128
GSG2	3	0.69367	0.74454	0.999709	13941	1	-3.3384	0.06903	0.068843	0.955432	1303	0	-3.3384	1.16096
RC3H2	3	0.48899	0.64389	0.999709	12037	2	-4.2302	0.06908	0.068896	0.955432	1304	0	-4.2302	1.16065
KRTAP5-4	3	0.61238	0.70329	0.999709	13184	1	-2.9718	0.069131	0.06895	0.955432	1305	0	-2.9718	1.16033
CCM2L	3	0.88317	0.88324	0.999709	16559	0	-3.1736	0.069182	0.068995	0.955432	1306	0	-3.1736	1.16001
CLDN11	3	0.90591	0.90602	0.999709	17005	0	-3.2518	0.069233	0.069043	0.955432	1307	0	-3.2518	1.15969
TMEM211	3	0.31734	0.47089	0.999709	8827	2	-4.4651	0.069283	0.069096	0.955432	1308	0	-4.4651	1.15937
RFXANK	3	0.94406	0.94427	0.999709	17765	0	-3.2133	0.069334	0.069143	0.955432	1309	0	-3.2133	1.15905
PLAC8L1	3	0.096249	0.2137	0.995571	3992	1	-3.3139	0.069385	0.069196	0.955432	1310	0	-3.3139	1.15873
RBM39	3	0.23724	0.38737	0.999709	7221	2	-4.4786	0.069943	0.06974	0.955432	1311	0	-4.4786	1.15526
ABCC2	3	0.83289	0.8369	0.999709	15694	1	-3.9176	0.069943	0.06974	0.955432	1312	0	-3.9176	1.15526
IKZF3	3	0.39034	0.54537	0.999709	10176	2	-4.3625	0.069943	0.06974	0.955432	1313	0	-4.3625	1.15526
YES1	3	0.90133	0.90143	0.999709	16913	0	-4.0333	0.069943	0.06974	0.955432	1314	0	-4.0333	1.15526
LGI4	3	0.57661	0.68695	0.999709	12875	1	-3.9057	0.069943	0.06974	0.955432	1315	0	-3.9057	1.15526
SLC41A3	3	0.49808	0.65295	0.999709	12220	2	-4.2172	0.069943	0.06974	0.955432	1316	0	-4.2172	1.15526
STK35	3	0.096249	0.2137	0.995571	3991	1	-3.5237	0.069943	0.06974	0.955432	1317	0	-3.5237	1.15526
MCF2L2	3	0.44906	0.6042	0.999709	11275	1	-3.7788	0.069943	0.06974	0.955432	1318	0	-3.7788	1.15526
FAM210B	3	0.71919	0.75907	0.999709	14238	1	-3.2898	0.069943	0.06974	0.955432	1319	0	-3.2898	1.15526
PPIF	3	0.15286	0.29727	0.999709	5550	1	-2.9171	0.069943	0.06974	0.955432	1320	0	-2.9171	1.15526
CLDN3	3	0.88367	0.88374	0.999709	16570	0	-4.0107	0.069943	0.06974	0.955432	1321	0	-4.0107	1.15526
OR5P3	3	0.99954	0.99953	1	18869	0	-2.2317	0.069943	0.06974	0.955432	1322	0	-2.2317	1.15526
PRKAR2A	3	0.81297	0.82101	0.999709	15378	1	-4.0442	0.069943	0.06974	0.955432	1323	0	-4.0442	1.15526
RAB4A	3	0.43377	0.58903	0.999709	10994	1	-3.6201	0.069943	0.06974	0.955432	1324	0	-3.6201	1.15526
UBAP1L	3	0.33838	0.49248	0.999709	9226	2	-4.4346	0.069943	0.06974	0.955432	1325	0	-4.4346	1.15526
MYO1C	3	0.86423	0.86457	0.999709	16214	1	-3.6733	0.069943	0.06974	0.955432	1326	0	-3.6733	1.15526
THEMIS2	3	0.90133	0.90143	0.999709	16921	0	-3.9215	0.069943	0.06974	0.955432	1327	0	-3.9215	1.15526
MED29	3	0.6747	0.73426	0.999709	13746	1	-4.147	0.069943	0.06974	0.955432	1328	0	-4.147	1.15526
ADM5	3	0.97061	0.97077	0.999709	18293	0	-3.5183	0.069943	0.06974	0.955432	1329	0	-3.5183	1.15526
FAM222B	3	0.53168	0.66775	0.999709	12506	1	-3.4967	0.070501	0.070286	0.955432	1330	0	-3.4967	1.1518
PCDHA10	3	0.4396	0.59487	0.999709	11092	2	-4.2302	0.070552	0.070339	0.955432	1331	0	-4.2302	1.15149
BCL3	3	0.73453	0.76819	0.999709	14406	1	-3.8645	0.070628	0.070429	0.955432	1332	0	-3.8645	1.15102
KNDC1	3	0.99817	0.99821	1	18846	0	-2.5945	0.070704	0.0705	0.955432	1333	0	-2.5945	1.15056
AGBL3	3	0.042175	0.10284	0.958624	1999	1	-3.9844	0.070755	0.070553	0.955432	1334	0	-3.9844	1.15024
LLGL2	3	0.64509	0.71919	0.999709	13464	1	-3.9533	0.070805	0.070608	0.955432	1335	0	-3.9533	1.14994
CEP97	3	0.49962	0.65445	0.999709	12246	1	-2.3784	0.070856	0.070659	0.955432	1336	0	-2.3784	1.14962
FAM200A	3	0.88574	0.88582	0.999709	16608	0	-3.4536	0.070907	0.07071	0.955432	1337	0	-3.4536	1.14931
NUDT14	3	0.61898	0.70643	0.999709	13239	1	-3.8564	0.070957	0.070764	0.955432	1338	0	-3.8564	1.149
ZBTB16	2	0.31666	0.42312	0.999709	8818	1	-3.5021	0.071683	0.071644	0.955432	1339	0	-3.5021	1.14458
EIF2B4	2	0.98662	0.98647	0.999709	18620	0	-2.5527	0.071683	0.071644	0.955432	1340	0	-2.5527	1.14458
C2CD3	1	0.92762	0.92794	0.999709	17456	0	-2.644	0.072377	0.072406	0.955432	1341	0	-2.644	1.1404
P2RX3	2	0.75246	0.75181	0.999709	14607	0	-3.0952	0.072418	0.072359	0.955432	1342	0	-3.0952	1.14015
AUP1	1	0.92611	0.9265	0.999709	17421	0	-2.6632	0.073885	0.073899	0.955432	1343	0	-2.6632	1.13144
TBC1D3C	1	0.92534	0.92578	0.999709	17409	0	-2.6724	0.074657	0.074679	0.955496	1344	0	-2.6724	1.12693
DPRX	3	0.64624	0.71974	0.999709	13474	1	-3.7524	0.074805	0.074623	0.955432	1345	0	-3.7524	1.12607
HIST2H2AB	3	0.97041	0.97057	0.999709	18290	0	-2.8511	0.074805	0.074623	0.955432	1346	0	-2.8511	1.12607
PRPF18	3	0.84186	0.84442	0.999709	15839	1	-3.7338	0.074805	0.074623	0.955432	1347	0	-3.7338	1.12607
CDK5RAP2	3	0.87828	0.87839	0.999709	16465	0	-3.6687	0.074805	0.074623	0.955432	1348	0	-3.6687	1.12607
PPFIA2	3	0.36543	0.52013	0.999709	9726	1	-3.953	0.074805	0.074623	0.955432	1349	0	-3.953	1.12607
HS3ST4	3	0.37894	0.53377	0.999709	9984	2	-4.3507	0.074805	0.074623	0.955432	1350	0	-4.3507	1.12607
GREB1L	3	0.89032	0.89038	0.999709	16700	0	-3.2645	0.074805	0.074623	0.955432	1351	0	-3.2645	1.12607
STEAP2	3	0.85024	0.8517	0.999709	15969	1	-3.9217	0.074805	0.074623	0.955432	1352	0	-3.9217	1.12607
TFF1	3	0.92962	0.92977	0.999709	17495	0	-3.4313	0.074805	0.074623	0.955432	1353	0	-3.4313	1.12607
MIA3	3	0.57378	0.68569	0.999709	12846	1	-4.0877	0.074805	0.074623	0.955432	1354	0	-4.0877	1.12607
GIP	3	0.45595	0.61116	0.999709	11426	2	-4.2746	0.074805	0.074623	0.955432	1355	0	-4.2746	1.12607
ANO1	3	0.94219	0.94234	0.999709	17726	0	-3.3773	0.074805	0.074623	0.955432	1356	0	-3.3773	1.12607
HACD4	3	0.17274	0.31873	0.999709	5929	2	-4.6881	0.074805	0.074623	0.955432	1357	0	-4.6881	1.12607
COA1	3	0.65867	0.72598	0.999709	13589	1	-3.8007	0.074805	0.074623	0.955432	1358	0	-3.8007	1.12607
FBXL17	3	0.16757	0.31315	0.999709	5828	1	-2.7376	0.074805	0.074623	0.955432	1359	0	-2.7376	1.12607
TCP11	3	0.035845	0.088621	0.958624	1715	2	-5.0537	0.074805	0.074623	0.955432	1360	0	-5.0537	1.12607
SNX19	3	0.21744	0.36656	0.999709	6830	2	-4.6109	0.074805	0.074623	0.955432	1361	0	-4.6109	1.12607
IL1RAP	3	0.2965	0.44926	0.999709	8431	2	-4.4946	0.074805	0.074623	0.955432	1362	0	-4.4946	1.12607
ALAD	3	0.91789	0.918	0.999709	17261	0	-4.0259	0.074805	0.074623	0.955432	1363	0	-4.0259	1.12607
DDX31	3	0.99119	0.99128	0.999709	18709	0	-3.0832	0.074805	0.074623	0.955432	1364	0	-3.0832	1.12607
DNAJC12	3	0.11748	0.25332	0.995571	4742	1	-3.4589	0.074805	0.074623	0.955432	1365	0	-3.4589	1.12607
SMIM24	3	0.047832	0.1153	0.969541	2225	2	-5.0016	0.074805	0.074623	0.955432	1366	0	-5.0016	1.12607
CROCC2	3	0.37803	0.53284	0.999709	9966	1	-3.8602	0.074805	0.074623	0.955432	1367	0	-3.8602	1.12607
PLEKHA2	3	0.16044	0.30538	0.999709	5693	1	-4.191	0.074805	0.074623	0.955432	1368	0	-4.191	1.12607
HOXD12	3	0.78963	0.80411	0.999709	15057	1	-2.2572	0.074805	0.074623	0.955432	1369	0	-2.2572	1.12607
ZNF726	3	0.16259	0.30773	0.999709	5727	2	-4.707	0.074805	0.074623	0.955432	1370	0	-4.707	1.12607
COL16A1	3	0.23811	0.38827	0.999709	7240	2	-4.5807	0.074805	0.074623	0.955432	1371	0	-4.5807	1.12607
NCK2	3	0.64067	0.71704	0.999709	13420	1	-3.1118	0.074805	0.074623	0.955432	1372	0	-3.1118	1.12607
JPH1	3	0.57485	0.68616	0.999709	12853	1	-4.1053	0.074805	0.074623	0.955432	1373	0	-4.1053	1.12607
PRAC2	3	0.84203	0.84457	0.999709	15841	1	-3.728	0.074805	0.074623	0.955432	1374	0	-3.728	1.12607
PMAIP1	3	0.65724	0.72527	0.999709	13574	1	-2.6822	0.074805	0.074623	0.955432	1375	0	-2.6822	1.12607
OTUD3	3	0.31521	0.46874	0.999709	8776	1	-2.8597	0.074805	0.074623	0.955432	1376	0	-2.8597	1.12607
DEFB105B	3	0.78802	0.80299	0.999709	15034	1	-3.1046	0.074805	0.074623	0.955432	1377	0	-3.1046	1.12607
SYN2	3	0.65658	0.72493	0.999709	13570	1	-2.6724	0.074805	0.074623	0.955432	1378	0	-2.6724	1.12607
FAM131B	3	0.79239	0.80604	0.999709	15089	1	-2.8083	0.074805	0.074623	0.955432	1379	0	-2.8083	1.12607
KIDINS220	3	0.59921	0.69721	0.999709	13074	1	-4.0032	0.074805	0.074623	0.955432	1380	0	-4.0032	1.12607
NDUFB6	3	0.42623	0.58153	0.999709	10853	1	-3.0836	0.074805	0.074623	0.955432	1381	0	-3.0836	1.12607
RAP1A	3	0.49999	0.65481	0.999709	12248	2	-4.2168	0.074805	0.074623	0.955432	1382	0	-4.2168	1.12607
HMGCS2	3	0.28725	0.43958	0.999709	8243	2	-4.5056	0.074805	0.074623	0.955432	1383	0	-4.5056	1.12607
HSPA8	3	0.58693	0.69152	0.999709	12960	1	-4.0404	0.074805	0.074623	0.955432	1384	0	-4.0404	1.12607
TAC1	3	0.44328	0.59853	0.999709	11165	1	-4.2072	0.074805	0.074623	0.955432	1385	0	-4.2072	1.12607
PRSS45	3	0.94761	0.94785	0.999709	17826	0	-3.1046	0.074805	0.074623	0.955432	1386	0	-3.1046	1.12607
RAB1B	3	0.93413	0.9343	0.999709	17573	0	-2.096	0.074805	0.074623	0.955432	1387	0	-2.096	1.12607
LRRC8C	3	0.043864	0.10663	0.96165	2076	2	-5.0168	0.074805	0.074623	0.955432	1388	0	-5.0168	1.12607
GATM	3	0.98824	0.98841	0.999709	18649	0	-3.3322	0.074805	0.074623	0.955432	1389	0	-3.3322	1.12607
PLCD1	3	0.82011	0.82663	0.999709	15489	1	-4.098	0.074805	0.074623	0.955432	1390	0	-4.098	1.12607
OS9	3	0.024686	0.062885	0.927072	1265	2	-4.8607	0.074805	0.074623	0.955432	1391	0	-4.8607	1.12607
SIGLEC5	3	0.33256	0.48648	0.999709	9111	1	-3.9173	0.074805	0.074623	0.955432	1392	0	-3.9173	1.12607
HPCAL1	3	0.87921	0.87928	0.999709	16481	0	-2.5507	0.074805	0.074623	0.955432	1393	0	-2.5507	1.12607
OR10P1	3	0.94079	0.94095	0.999709	17701	0	-3.6006	0.074805	0.074623	0.955432	1394	0	-3.6006	1.12607
TXNDC11	3	0.22508	0.37452	0.999709	6987	2	-4.6008	0.074805	0.074623	0.955432	1395	0	-4.6008	1.12607
EN2	3	0.28814	0.4405	0.999709	8263	1	-3.2133	0.074805	0.074623	0.955432	1396	0	-3.2133	1.12607
ELAC1	3	0.86734	0.86754	0.999709	16281	1	-2.7469	0.074805	0.074623	0.955432	1397	0	-2.7469	1.12607
WDHD1	3	0.63538	0.71442	0.999709	13364	1	-3.7062	0.074805	0.074623	0.955432	1398	0	-3.7062	1.12607
LCE1A	3	0.99267	0.99279	0.999709	18741	0	-3.2584	0.074805	0.074623	0.955432	1399	0	-3.2584	1.12607
TMEM191B	3	0.99085	0.99097	0.999709	18705	0	-3.3202	0.074805	0.074623	0.955432	1400	0	-3.3202	1.12607
EPPIN-WFDC6	3	0.95155	0.95183	0.999709	17917	0	-3.8688	0.074805	0.074623	0.955432	1401	0	-3.8688	1.12607
STPG2	3	0.98113	0.98126	0.999709	18503	0	-2.2694	0.074805	0.074623	0.955432	1402	0	-2.2694	1.12607
SASS6	3	0.14223	0.28575	0.999709	5357	2	-4.7457	0.074805	0.074623	0.955432	1403	0	-4.7457	1.12607
SPZ1	3	0.58068	0.68874	0.999709	12913	1	-2.6822	0.074805	0.074623	0.955432	1404	0	-2.6822	1.12607
TEKT3	3	0.40766	0.56288	0.999709	10485	2	-4.339	0.074805	0.074623	0.955432	1405	0	-4.339	1.12607
SFRP5	3	0.98394	0.9841	0.999709	18561	0	-2.3032	0.074805	0.074623	0.955432	1406	0	-2.3032	1.12607
CES4A	3	0.44238	0.59764	0.999709	11152	2	-4.2932	0.074805	0.074623	0.955432	1407	0	-4.2932	1.12607
FFAR2	3	0.033144	0.082489	0.957159	1604	1	-3.4255	0.074805	0.074623	0.955432	1408	0	-3.4255	1.12607
LRRC32	3	0.97935	0.97951	0.999709	18474	0	-3.6449	0.074805	0.074623	0.955432	1409	0	-3.6449	1.12607
VGF	3	0.011404	0.030337	0.925615	611	2	-4.7367	0.074805	0.074623	0.955432	1410	0	-4.7367	1.12607
COX14	3	0.72817	0.76441	0.999709	14333	1	-3.7521	0.074805	0.074623	0.955432	1411	0	-3.7521	1.12607
ATP2B2	3	0.81942	0.82608	0.999709	15474	1	-3.7384	0.074805	0.074623	0.955432	1412	0	-3.7384	1.12607
PACS1	3	2.66e-05	8.62e-05	0.533416	3	1	-4.1908	0.074805	0.074623	0.955432	1413	0	-4.1908	1.12607
TOPORS	3	0.99549	0.9956	0.999852	18803	0	-2.6724	0.074805	0.074623	0.955432	1414	0	-2.6724	1.12607
GEMIN6	3	0.48536	0.64034	0.999709	11965	1	-2.4797	0.074805	0.074623	0.955432	1415	0	-2.4797	1.12607
CCL20	3	0.87828	0.87839	0.999709	16466	0	-2.096	0.074805	0.074623	0.955432	1416	0	-2.096	1.12607
IGSF10	3	0.76239	0.78579	0.999709	14710	1	-3.0543	0.074805	0.074623	0.955432	1417	0	-3.0543	1.12607
SCAP	3	0.8474	0.84923	0.999709	15924	1	-3.9957	0.074805	0.074623	0.955432	1418	0	-3.9957	1.12607
RUNDC1	3	0.60475	0.69975	0.999709	13121	1	-3.7833	0.074805	0.074623	0.955432	1419	0	-3.7833	1.12607
ADGRB2	3	0.84929	0.85087	0.999709	15962	1	-2.4241	0.074805	0.074623	0.955432	1420	0	-2.4241	1.12607
ARMC6	3	0.02339	0.059785	0.925947	1195	2	-5.1265	0.074805	0.074623	0.955432	1421	0	-5.1265	1.12607
OR52M1	3	0.70471	0.75075	0.999709	14078	1	-3.1466	0.074805	0.074623	0.955432	1422	0	-3.1466	1.12607
PRR20B	3	0.98113	0.98126	0.999709	18504	0	-2.8775	0.074805	0.074623	0.955432	1423	0	-2.8775	1.12607
MTMR1	3	0.26911	0.42076	0.999709	7878	1	-4.181	0.074805	0.074623	0.955432	1424	0	-4.181	1.12607
RAB22A	3	0.89742	0.89752	0.999709	16839	0	-3.7613	0.074805	0.074623	0.955432	1425	0	-3.7613	1.12607
MAP3K2	3	0.14103	0.28447	0.999709	5331	2	-4.748	0.074805	0.074623	0.955432	1426	0	-4.748	1.12607
STAT5A	3	0.81784	0.82481	0.999709	15451	1	-3.5288	0.074805	0.074623	0.955432	1427	0	-3.5288	1.12607
ZRANB3	3	0.11596	0.25057	0.995571	4687	1	-2.1654	0.074805	0.074623	0.955432	1428	0	-2.1654	1.12607
RGL4	3	0.81053	0.81916	0.999709	15350	1	-4.2105	0.074805	0.074623	0.955432	1429	0	-4.2105	1.12607
NIPAL4	3	0.30003	0.45297	0.999709	8507	2	-4.4894	0.074805	0.074623	0.955432	1430	0	-4.4894	1.12607
MOGS	3	0.41265	0.56789	0.999709	10582	2	-4.3328	0.074805	0.074623	0.955432	1431	0	-4.3328	1.12607
DBH	3	0.99824	0.99828	1	18849	0	-2.6533	0.074805	0.074623	0.955432	1432	0	-2.6533	1.12607
BRK1	3	0.80675	0.81631	0.999709	15297	1	-3.9335	0.074805	0.074623	0.955432	1433	0	-3.9335	1.12607
DDX50	3	0.9834	0.98355	0.999709	18548	0	-3.1667	0.074805	0.074623	0.955432	1434	0	-3.1667	1.12607
CALM2	3	0.69432	0.74489	0.999709	13950	1	-4.1193	0.074805	0.074623	0.955432	1435	0	-4.1193	1.12607
PFN4	3	0.65935	0.72632	0.999709	13595	1	-3.431	0.074805	0.074623	0.955432	1436	0	-3.431	1.12607
CNN1	3	0.13722	0.28035	0.999709	5262	1	-3.7202	0.074805	0.074623	0.955432	1437	0	-3.7202	1.12607
CD1C	3	0.95781	0.95807	0.999709	18039	0	-3.1601	0.074805	0.074623	0.955432	1438	0	-3.1601	1.12607
KIAA0100	3	0.15944	0.30434	0.999709	5676	2	-4.2618	0.074805	0.074623	0.955432	1439	0	-4.2618	1.12607
ADCY5	3	0.9043	0.90436	0.999709	16974	0	-3.6449	0.074805	0.074623	0.955432	1440	0	-3.6449	1.12607
CAMKK2	3	0.9545	0.95481	0.999709	17977	0	-3.3914	0.074805	0.074623	0.955432	1441	0	-3.3914	1.12607
TPH2	3	0.4868	0.64173	0.999709	11984	2	-4.2333	0.074805	0.074623	0.955432	1442	0	-4.2333	1.12607
CFAP44	3	0.54125	0.67178	0.999709	12586	1	-3.3017	0.074805	0.074623	0.955432	1443	0	-3.3017	1.12607
TTC28	3	0.055888	0.13274	0.983567	2529	2	-4.9711	0.074805	0.074623	0.955432	1444	0	-4.9711	1.12607
TEX47	3	0.82812	0.83297	0.999709	15620	1	-2.0822	0.074805	0.074623	0.955432	1445	0	-2.0822	1.12607
S100A7A	3	0.95097	0.95123	0.999709	17908	0	-1.8989	0.074805	0.074623	0.955432	1446	0	-1.8989	1.12607
ACP6	3	0.51345	0.66023	0.999709	12352	1	-3.283	0.074805	0.074623	0.955432	1447	0	-3.283	1.12607
CHRDL2	3	0.30367	0.45677	0.999709	8572	2	-4.484	0.074805	0.074623	0.955432	1448	0	-4.484	1.12607
LIMD2	3	0.089889	0.20142	0.995571	3765	1	-2.3671	0.074805	0.074623	0.955432	1449	0	-2.3671	1.12607
C18orf25	3	0.97784	0.978	0.999709	18443	0	-2.634	0.074805	0.074623	0.955432	1450	0	-2.634	1.12607
PELP1	3	0.99666	0.99672	0.999916	18820	0	-3.1667	0.074805	0.074623	0.955432	1451	0	-3.1667	1.12607
HSPB8	3	0.61406	0.7041	0.999709	13198	1	-3.1667	0.074805	0.074623	0.955432	1452	0	-3.1667	1.12607
STIM1	3	0.1351	0.27804	0.999709	5205	2	-4.7613	0.074805	0.074623	0.955432	1453	0	-4.7613	1.12607
MIXL1	3	0.65796	0.72562	0.999709	13579	1	-3.6153	0.074805	0.074623	0.955432	1454	0	-3.6153	1.12607
SENP3	3	0.23277	0.38267	0.999709	7137	1	-3.8437	0.074805	0.074623	0.955432	1455	0	-3.8437	1.12607
SERP2	3	0.22381	0.3732	0.999709	6955	1	-2.4579	0.074805	0.074623	0.955432	1456	0	-2.4579	1.12607
SNX18	3	0.10617	0.2325	0.995571	4339	2	-4.8228	0.074805	0.074623	0.955432	1457	0	-4.8228	1.12607
PAFAH1B2	3	0.46276	0.61796	0.999709	11550	2	-4.2653	0.074805	0.074623	0.955432	1458	0	-4.2653	1.12607
SLC10A5	3	0.88574	0.88582	0.999709	16613	0	-2.5539	0.074805	0.074623	0.955432	1459	0	-2.5539	1.12607
NMRK2	3	0.49006	0.64493	0.999709	12053	2	-4.23	0.074805	0.074623	0.955432	1460	0	-4.23	1.12607
SYDE1	3	0.0062338	0.017041	0.880817	352	2	-5.327	0.074805	0.074623	0.955432	1461	0	-5.327	1.12607
ADRB2	3	0.40806	0.56329	0.999709	10502	1	-3.8768	0.074805	0.074623	0.955432	1462	0	-3.8768	1.12607
OLFML3	3	0.032571	0.081218	0.954745	1586	1	-2.8088	0.074805	0.074623	0.955432	1463	0	-2.8088	1.12607
DNAH17	3	0.81837	0.82521	0.999709	15464	1	-2.2676	0.074805	0.074623	0.955432	1464	0	-2.2676	1.12607
BRF2	3	0.95766	0.95793	0.999709	18035	0	-3.8688	0.074805	0.074623	0.955432	1465	0	-3.8688	1.12607
SLC47A1	3	0.80463	0.81474	0.999709	15263	1	-3.4025	0.074805	0.074623	0.955432	1466	0	-3.4025	1.12607
PPP1R7	3	0.82261	0.82863	0.999709	15527	1	-3.7521	0.074805	0.074623	0.955432	1467	0	-3.7521	1.12607
AFM	3	0.69821	0.74708	0.999709	13998	1	-3.497	0.074805	0.074623	0.955432	1468	0	-3.497	1.12607
DECR1	3	0.40806	0.56329	0.999709	10496	1	-4.1226	0.074805	0.074623	0.955432	1469	0	-4.1226	1.12607
TOB1	3	0.38619	0.54117	0.999709	10111	2	-4.3682	0.074805	0.074623	0.955432	1470	0	-4.3682	1.12607
TMEM245	3	0.62474	0.70927	0.999709	13284	1	-3.4863	0.074805	0.074623	0.955432	1471	0	-3.4863	1.12607
RSPH4A	3	0.76352	0.7865	0.999709	14722	1	-4.0841	0.074805	0.074623	0.955432	1472	0	-4.0841	1.12607
CHRNB3	3	0.9409	0.94107	0.999709	17703	0	-3.4331	0.074805	0.074623	0.955432	1473	0	-3.4331	1.12607
GAS2L2	3	0.32148	0.47514	0.999709	8918	2	-4.4594	0.074805	0.074623	0.955432	1474	0	-4.4594	1.12607
C21orf62	3	0.50561	0.65708	0.999709	12289	1	-3.9135	0.074805	0.074623	0.955432	1475	0	-3.9135	1.12607
ARHGDIB	3	0.26876	0.42038	0.999709	7872	1	-3.7065	0.074805	0.074623	0.955432	1476	0	-3.7065	1.12607
MMEL1	3	0.15307	0.29748	0.999709	5557	1	-3.575	0.078642	0.078526	0.967039	1477	0	-3.575	1.10435
AADACL2	3	0.15816	0.30297	0.999709	5649	1	-2.9005	0.078692	0.078575	0.967039	1478	0	-2.9005	1.10407
ELP5	3	0.28725	0.43958	0.999709	8240	2	-4.5056	0.078743	0.07862	0.967039	1479	0	-4.5056	1.10379
UROS	3	0.32524	0.479	0.999709	8983	1	-3.283	0.078793	0.078677	0.967039	1480	0	-3.283	1.10351
PTCHD4	3	0.98889	0.98901	0.999709	18654	0	-3.22	0.078843	0.078727	0.967039	1481	0	-3.22	1.10324
DET1	3	0.52203	0.66375	0.999709	12419	1	-3.9256	0.078894	0.078777	0.967039	1482	0	-3.9256	1.10296
CR1L	3	0.50825	0.65812	0.999709	12310	1	-3.2453	0.078944	0.078823	0.967039	1483	0	-3.2453	1.10268
DDC	3	0.50534	0.65696	0.999709	12288	1	-4.098	0.078995	0.078873	0.967039	1484	0	-4.098	1.1024
AMPH	2	0.53426	0.5676	0.999709	12525	1	-3.4061	0.079056	0.079043	0.967039	1485	0	-3.4061	1.10207
NEIL3	2	0.97342	0.97332	0.999709	18353	0	-2.7481	0.079056	0.079043	0.967039	1486	0	-2.7481	1.10207
KDM2A	3	0.89808	0.8982	0.999709	16856	0	-3.6924	0.08121	0.08107	0.967039	1487	0	-3.6924	1.09039
ENTPD5	3	0.11998	0.25783	0.995571	4838	2	-4.7527	0.08121	0.08107	0.967039	1488	0	-4.7527	1.09039
NKX2-2	3	0.39342	0.54846	0.999709	10232	2	-4.3568	0.08121	0.08107	0.967039	1489	0	-4.3568	1.09039
USH1G	3	0.048721	0.11725	0.969541	2268	2	-4.998	0.08121	0.08107	0.967039	1490	0	-4.998	1.09039
FCRL5	3	0.53501	0.66917	0.999709	12529	1	-4.0515	0.08121	0.08107	0.967039	1491	0	-4.0515	1.09039
HMP19	3	0.046437	0.11228	0.965579	2179	1	-3.1823	0.08121	0.08107	0.967039	1492	0	-3.1823	1.09039
ARSI	3	0.92218	0.92228	0.999709	17341	0	-2.9487	0.08121	0.08107	0.967039	1493	0	-2.9487	1.09039
TNKS	3	0.95817	0.95842	0.999709	18048	0	-3.4201	0.08121	0.08107	0.967039	1494	0	-3.4201	1.09039
TEAD4	3	0.2143	0.36328	0.999709	6780	1	-3.2133	0.08121	0.08107	0.967039	1495	0	-3.2133	1.09039
CRTC2	3	0.12659	0.26862	0.999709	5028	2	-4.6283	0.08121	0.08107	0.967039	1496	0	-4.6283	1.09039
OR8G2P	3	0.40846	0.5637	0.999709	10505	1	-3.9725	0.08121	0.08107	0.967039	1497	0	-3.9725	1.09039
OR8B8	3	0.39574	0.5508	0.999709	10277	1	-3.6252	0.08121	0.08107	0.967039	1498	0	-3.6252	1.09039
CRNN	3	0.97848	0.97864	0.999709	18454	0	-3.0177	0.08121	0.08107	0.967039	1499	0	-3.0177	1.09039
S100G	3	0.33528	0.48925	0.999709	9158	2	-4.3057	0.08121	0.08107	0.967039	1500	0	-4.3057	1.09039
MED21	3	0.032307	0.080614	0.954745	1567	2	-5.072	0.08121	0.08107	0.967039	1501	0	-5.072	1.09039
ANKRD36C	3	0.67092	0.73227	0.999709	13703	1	-4.0071	0.08121	0.08107	0.967039	1502	0	-4.0071	1.09039
KCNJ13	3	0.73819	0.77049	0.999709	14449	1	-4.0767	0.08121	0.08107	0.967039	1503	0	-4.0767	1.09039
OR2B2	3	0.048988	0.11781	0.970697	2279	1	-2.8842	0.08121	0.08107	0.967039	1504	0	-2.8842	1.09039
RAB5A	3	0.98657	0.98672	0.999709	18618	0	-3.5234	0.08121	0.08107	0.967039	1505	0	-3.5234	1.09039
PARP9	3	0.080229	0.18255	0.995571	3403	1	-3.8475	0.08121	0.08107	0.967039	1506	0	-3.8475	1.09039
ZNF570	3	0.76287	0.78609	0.999709	14714	1	-4.055	0.08121	0.08107	0.967039	1507	0	-4.055	1.09039
GVQW2	3	0.83543	0.83896	0.999709	15741	1	-4.0625	0.08121	0.08107	0.967039	1508	0	-4.0625	1.09039
CYP4F12	3	0.05564	0.13222	0.983567	2521	1	-3.8353	0.08121	0.08107	0.967039	1509	0	-3.8353	1.09039
POLD2	3	0.88211	0.88217	0.999709	16537	0	-3.0958	0.08121	0.08107	0.967039	1510	0	-3.0958	1.09039
STAU1	3	0.48082	0.63584	0.999709	11880	2	-4.2428	0.08121	0.08107	0.967039	1511	0	-4.2428	1.09039
CFAP57	3	0.030186	0.075774	0.952086	1486	2	-4.2771	0.08121	0.08107	0.967039	1512	0	-4.2771	1.09039
OR5L1	3	0.98195	0.98213	0.999709	18524	0	-2.6632	0.08121	0.08107	0.967039	1513	0	-2.6632	1.09039
SLC35G4	3	0.85704	0.85783	0.999709	16095	1	-4.0769	0.08121	0.08107	0.967039	1514	0	-4.0769	1.09039
CD5	3	0.80224	0.81302	0.999709	15229	1	-4.1639	0.08121	0.08107	0.967039	1515	0	-4.1639	1.09039
HRK	3	0.93477	0.93496	0.999709	17592	0	-3.8177	0.08121	0.08107	0.967039	1516	0	-3.8177	1.09039
FCRL2	3	0.89165	0.89171	0.999709	16720	0	-2.4908	0.08121	0.08107	0.967039	1517	0	-2.4908	1.09039
SERPINB7	3	0.6896	0.74226	0.999709	13900	1	-3.3738	0.08121	0.08107	0.967039	1518	0	-3.3738	1.09039
PDAP1	3	0.80451	0.81466	0.999709	15261	1	-3.3429	0.08121	0.08107	0.967039	1519	0	-3.3429	1.09039
WDR27	3	0.7054	0.75113	0.999709	14084	1	-2.5744	0.08121	0.08107	0.967039	1520	0	-2.5744	1.09039
GPR173	3	0.65367	0.72345	0.999709	13544	1	-3.575	0.08121	0.08107	0.967039	1521	0	-3.575	1.09039
RPA2	3	0.74379	0.77391	0.999709	14519	1	-4.1807	0.08121	0.08107	0.967039	1522	0	-4.1807	1.09039
ANKRD29	3	0.018192	0.047171	0.925947	927	2	-5.166	0.08121	0.08107	0.967039	1523	0	-5.166	1.09039
SIPA1	3	0.30857	0.4619	0.999709	8661	2	-4.3326	0.08121	0.08107	0.967039	1524	0	-4.3326	1.09039
KRTAP19-6	3	0.89547	0.89557	0.999709	16800	0	-3.5854	0.08121	0.08107	0.967039	1525	0	-3.5854	1.09039
ERICH6	3	0.10147	0.22363	0.995571	4187	1	-3.3678	0.08121	0.08107	0.967039	1526	0	-3.3678	1.09039
MRPS33	3	0.88284	0.88291	0.999709	16550	0	-3.0767	0.08121	0.08107	0.967039	1527	0	-3.0767	1.09039
GRID2IP	3	0.39433	0.54936	0.999709	10250	2	-4.3566	0.08121	0.08107	0.967039	1528	0	-4.3566	1.09039
TEX2	3	0.49006	0.64493	0.999709	12055	2	-4.23	0.08121	0.08107	0.967039	1529	0	-4.23	1.09039
NDUFA9	3	0.80988	0.81865	0.999709	15333	1	-3.1934	0.08121	0.08107	0.967039	1530	0	-3.1934	1.09039
HNRNPL	3	0.44654	0.60169	0.999709	11232	1	-3.5074	0.08121	0.08107	0.967039	1531	0	-3.5074	1.09039
PPP2R5B	3	0.96811	0.96831	0.999709	18236	0	-3.5132	0.08121	0.08107	0.967039	1532	0	-3.5132	1.09039
KCTD7	3	0.12386	0.26483	0.998079	4970	2	-4.7834	0.08121	0.08107	0.967039	1533	0	-4.7834	1.09039
GTF2I	3	0.62181	0.70778	0.999709	13259	1	-3.4084	0.08121	0.08107	0.967039	1534	0	-3.4084	1.09039
TRIM39-RPP21	3	0.93603	0.93621	0.999709	17615	0	-3.702	0.08121	0.08107	0.967039	1535	0	-3.702	1.09039
ZBTB6	3	0.28986	0.44233	0.999709	8285	1	-3.5753	0.08121	0.08107	0.967039	1536	0	-3.5753	1.09039
SPRR2F	3	0.97875	0.97891	0.999709	18460	0	-3.5854	0.08121	0.08107	0.967039	1537	0	-3.5854	1.09039
LEPROTL1	3	0.47302	0.62815	0.999709	11734	2	-4.2525	0.08121	0.08107	0.967039	1538	0	-4.2525	1.09039
CFAP47	3	0.74503	0.7747	0.999709	14528	1	-3.9217	0.08121	0.08107	0.967039	1539	0	-3.9217	1.09039
CD52	3	0.13641	0.27946	0.999709	5233	2	-4.7571	0.08121	0.08107	0.967039	1540	0	-4.7571	1.09039
HILPDA	3	0.31182	0.46523	0.999709	8703	2	-4.4732	0.08121	0.08107	0.967039	1541	0	-4.4732	1.09039
PBOV1	3	0.4575	0.6127	0.999709	11454	1	-3.5128	0.08121	0.08107	0.967039	1542	0	-3.5128	1.09039
DUSP2	3	0.11763	0.25359	0.995571	4746	2	-4.7967	0.08121	0.08107	0.967039	1543	0	-4.7967	1.09039
NOX1	3	0.65581	0.72455	0.999709	13562	1	-2.9406	0.08121	0.08107	0.967039	1544	0	-2.9406	1.09039
PWWP2A	3	0.99645	0.99652	0.999916	18817	0	-2.901	0.08121	0.08107	0.967039	1545	0	-2.901	1.09039
NOTCH2NL	3	0.98173	0.98189	0.999709	18520	0	-3.2645	0.08121	0.08107	0.967039	1546	0	-3.2645	1.09039
CCDC78	3	0.86996	0.87011	0.999709	16319	1	-4.194	0.08121	0.08107	0.967039	1547	0	-4.194	1.09039
TBX18	3	0.76473	0.78728	0.999709	14735	1	-3.9608	0.08121	0.08107	0.967039	1548	0	-3.9608	1.09039
IGFBP7	3	0.82689	0.83196	0.999709	15589	1	-3.9176	0.08121	0.08107	0.967039	1549	0	-3.9176	1.09039
CNGA2	3	0.99537	0.99548	0.999852	18800	0	-3.1732	0.08121	0.08107	0.967039	1550	0	-3.1732	1.09039
CACNA1E	3	0.10166	0.22401	0.995571	4191	1	-3.6876	0.08121	0.08107	0.967039	1551	0	-3.6876	1.09039
CEBPD	3	0.69302	0.74418	0.999709	13922	1	-3.8221	0.08121	0.08107	0.967039	1552	0	-3.8221	1.09039
C2orf88	3	0.14272	0.28628	0.999709	5363	2	-4.7437	0.08121	0.08107	0.967039	1553	0	-4.7437	1.09039
GRM6	3	0.95789	0.95815	0.999709	18045	0	-3.5183	0.08121	0.08107	0.967039	1554	0	-3.5183	1.09039
DEDD2	3	0.023952	0.061168	0.927072	1224	2	-4.6037	0.08121	0.08107	0.967039	1555	0	-4.6037	1.09039
RPS11	3	0.11154	0.2425	0.995571	4540	1	-2.3069	0.08121	0.08107	0.967039	1556	0	-2.3069	1.09039
PDCD1LG2	3	0.13369	0.27654	0.999709	5169	1	-3.5701	0.08121	0.08107	0.967039	1557	0	-3.5701	1.09039
SLC22A1	3	0.66679	0.73019	0.999709	13661	1	-2.9005	0.08121	0.08107	0.967039	1558	0	-2.9005	1.09039
ATAD2	3	0.26084	0.41218	0.999709	7698	1	-3.3738	0.08121	0.08107	0.967039	1559	0	-3.3738	1.09039
PHLDB1	3	0.5014	0.65538	0.999709	12263	1	-2.7648	0.08121	0.08107	0.967039	1560	0	-2.7648	1.09039
PNLIPRP3	3	0.28566	0.43792	0.999709	8210	2	-4.5082	0.08121	0.08107	0.967039	1561	0	-4.5082	1.09039
ENDOV	3	0.75491	0.78093	0.999709	14623	1	-3.4755	0.08121	0.08107	0.967039	1562	0	-3.4755	1.09039
FAM3C	3	0.93603	0.93621	0.999709	17619	0	-3.5802	0.08121	0.08107	0.967039	1563	0	-3.5802	1.09039
DCUN1D5	3	0.82421	0.82987	0.999709	15551	1	-4.0369	0.08121	0.08107	0.967039	1564	0	-4.0369	1.09039
HNRNPH1	3	0.20351	0.35189	0.999709	6548	2	-4.6332	0.08121	0.08107	0.967039	1565	0	-4.6332	1.09039
NBPF15	2	0.69123	0.69396	0.999709	13910	1	-3.2855	0.081285	0.081257	0.967039	1566	0	-3.2855	1.08999
GAGE12J	1	0.91815	0.91866	0.999709	17263	0	-2.7193	0.081854	0.081899	0.967039	1567	0	-2.7193	1.08696
RAMP1	2	0.97006	0.96997	0.999709	18275	0	-2.6789	0.081932	0.081912	0.967039	1568	0	-2.6789	1.08655
IFNLR1	3	0.90386	0.90391	0.999709	16966	0	-3.575	0.083423	0.08329	0.967039	1569	0	-3.575	1.07871
NOD2	3	0.20985	0.35857	0.999709	6676	1	-3.6399	0.083473	0.083341	0.967039	1570	0	-3.6399	1.07845
FAM229A	3	0.8133	0.82126	0.999709	15383	1	-3.3202	0.083523	0.083383	0.967039	1571	0	-3.3202	1.07819
AMY1A	3	0.37075	0.52554	0.999709	9825	1	-3.8309	0.083574	0.083441	0.967039	1572	0	-3.8309	1.07793
UHRF1	3	0.058226	0.13766	0.985438	2613	2	-4.9617	0.083624	0.083487	0.967039	1573	0	-4.9617	1.07767
PCDHB13	3	0.9714	0.97158	0.999709	18309	0	-2.8926	0.083674	0.083542	0.967039	1574	0	-2.8926	1.07741
PLCB3	3	0.97359	0.97374	0.999709	18358	0	-3.1478	0.083724	0.083594	0.967039	1575	0	-3.1478	1.07715
RNASEK	3	0.26047	0.4118	0.999709	7697	1	-3.0058	0.083774	0.083646	0.967039	1576	0	-3.0058	1.07689
OR8H2	3	0.81769	0.82469	0.999709	15448	1	-3.4815	0.083825	0.083696	0.967039	1577	0	-3.4815	1.07663
USB1	3	0.92471	0.92481	0.999709	17397	0	-3.965	0.083875	0.083748	0.967039	1578	0	-3.965	1.07637
SLC35G1	3	0.90805	0.90814	0.999709	17046	0	-2.3671	0.083925	0.08379	0.967039	1579	0	-2.3671	1.07611
USP26	3	0.14326	0.2869	0.999709	5375	1	-4.0292	0.083975	0.083838	0.967039	1580	0	-4.0292	1.07585
YY1AP1	3	0.28958	0.44202	0.999709	8275	1	-2.9171	0.084026	0.083878	0.967039	1581	0	-2.9171	1.07559
ZNF598	3	0.9838	0.98396	0.999709	18559	0	-2.9821	0.08503	0.084866	0.967039	1582	0	-2.9821	1.07043
TBX1	3	0.66315	0.72827	0.999709	13629	1	-3.6349	0.08503	0.084866	0.967039	1583	0	-3.6349	1.07043
FGF20	3	0.87086	0.87101	0.999709	16343	1	-4.1573	0.08503	0.084866	0.967039	1584	0	-4.1573	1.07043
CIB3	3	0.40378	0.55894	0.999709	10421	2	-4.3448	0.08503	0.084866	0.967039	1585	0	-4.3448	1.07043
TFDP2	3	0.86572	0.86599	0.999709	16245	1	-3.5958	0.08503	0.084866	0.967039	1586	0	-3.5958	1.07043
SUPV3L1	3	0.0065841	0.017939	0.880817	373	2	-5.3196	0.08503	0.084866	0.967039	1587	0	-5.3196	1.07043
SAP30BP	3	0.1903	0.33774	0.999709	6288	2	-4.6572	0.08503	0.084866	0.967039	1588	0	-4.6572	1.07043
ABR	3	0.1622	0.3073	0.999709	5720	2	-4.7091	0.08503	0.084866	0.967039	1589	0	-4.7091	1.07043
SPATA8	3	0.35067	0.50496	0.999709	9451	1	-3.4863	0.08503	0.084866	0.967039	1590	0	-3.4863	1.07043
OXLD1	3	0.97972	0.97985	0.999709	18480	0	-3.575	0.08503	0.084866	0.967039	1591	0	-3.575	1.07043
COX5B	3	0.59516	0.69534	0.999709	13041	1	-3.2898	0.08503	0.084866	0.967039	1592	0	-3.2898	1.07043
SNX24	3	0.99453	0.99463	0.999852	18782	0	-3.025	0.08503	0.084866	0.967039	1593	0	-3.025	1.07043
SEMA4D	3	0.68177	0.73804	0.999709	13822	1	-3.6252	0.08503	0.084866	0.967039	1594	0	-3.6252	1.07043
MT1F	3	0.99689	0.99693	0.999916	18827	0	-2.2694	0.08503	0.084866	0.967039	1595	0	-2.2694	1.07043
TOP2B	3	0.39805	0.55317	0.999709	10331	2	-4.3509	0.08503	0.084866	0.967039	1596	0	-4.3509	1.07043
CLRN1	3	0.37284	0.52768	0.999709	9868	2	-4.386	0.08503	0.084866	0.967039	1597	0	-4.386	1.07043
KRTAP9-3	3	0.41202	0.56725	0.999709	10579	1	-3.497	0.08503	0.084866	0.967039	1598	0	-3.497	1.07043
HSBP1	3	0.7236	0.76167	0.999709	14297	1	-3.5183	0.08503	0.084866	0.967039	1599	0	-3.5183	1.07043
TEX13A	3	0.91513	0.91521	0.999709	17198	0	-3.3442	0.08503	0.084866	0.967039	1600	0	-3.3442	1.07043
ALG10B	3	0.2514	0.40228	0.999709	7505	1	-4.1087	0.08503	0.084866	0.967039	1601	0	-4.1087	1.07043
MVK	3	0.37989	0.53476	0.999709	10005	1	-2.634	0.08503	0.084866	0.967039	1602	0	-2.634	1.07043
CD300LF	3	0.89742	0.89752	0.999709	16836	0	-4.1295	0.08503	0.084866	0.967039	1603	0	-4.1295	1.07043
RALYL	3	0.92168	0.92175	0.999709	17335	0	-2.852	0.08503	0.084866	0.967039	1604	0	-2.852	1.07043
ZXDA	3	0.15371	0.2982	0.999709	5567	2	-4.7251	0.08503	0.084866	0.967039	1605	0	-4.7251	1.07043
PLOD1	3	0.99868	0.99872	1	18854	0	-2.5639	0.08503	0.084866	0.967039	1606	0	-2.5639	1.07043
TAGLN3	3	0.99723	0.99726	1	18832	0	-2.6144	0.08503	0.084866	0.967039	1607	0	-2.6144	1.07043
MPP2	3	0.94602	0.94622	0.999709	17796	0	-3.4084	0.08503	0.084866	0.967039	1608	0	-3.4084	1.07043
RAB2A	3	0.53782	0.67035	0.999709	12555	1	-2.634	0.08503	0.084866	0.967039	1609	0	-2.634	1.07043
VPS33A	3	0.90327	0.90334	0.999709	16952	0	-4.0625	0.08503	0.084866	0.967039	1610	0	-4.0625	1.07043
ATP6V1A	3	0.58152	0.6891	0.999709	12920	1	-3.9176	0.08503	0.084866	0.967039	1611	0	-3.9176	1.07043
TBRG4	3	0.17359	0.31963	0.999709	5947	2	-4.2651	0.08503	0.084866	0.967039	1612	0	-4.2651	1.07043
CD247	3	0.2767	0.42872	0.999709	8025	2	-4.5213	0.08503	0.084866	0.967039	1613	0	-4.5213	1.07043
THAP8	3	0.48536	0.64034	0.999709	11960	1	-2.5409	0.08503	0.084866	0.967039	1614	0	-2.5409	1.07043
HYPK	3	0.20069	0.34884	0.999709	6495	1	-2.2694	0.08503	0.084866	0.967039	1615	0	-2.2694	1.07043
TEX12	3	0.96638	0.9666	0.999709	18201	0	-2.9166	0.08503	0.084866	0.967039	1616	0	-2.9166	1.07043
LSM3	2	0.7781	0.77735	0.999709	14892	0	-3.2132	0.085737	0.085675	0.967039	1617	0	-3.2132	1.06683
NOSTRIN	2	0.98363	0.98352	0.999709	18556	0	-2.6693	0.085737	0.085675	0.967039	1618	0	-2.6693	1.06683
SCN8A	3	0.90842	0.90852	0.999709	17059	0	-3.5802	0.086033	0.085837	0.967039	1619	0	-3.5802	1.06533
IRX6	3	0.27694	0.42896	0.999709	8033	1	-3.6449	0.086083	0.085882	0.967039	1620	0	-3.6449	1.06508
TMEM218	3	0.78288	0.79936	0.999709	14959	1	-3.9215	0.086133	0.085928	0.967039	1621	0	-3.9215	1.06483
SPATA24	3	0.78498	0.80079	0.999709	14990	1	-2.644	0.086183	0.085974	0.967039	1622	0	-2.644	1.06458
PQLC1	3	0.23582	0.38588	0.999709	7192	2	-4.5835	0.086233	0.086023	0.967039	1623	0	-4.5835	1.06433
CBR3	3	0.72065	0.75992	0.999709	14256	1	-3.8894	0.086334	0.086111	0.967039	1624	0	-3.8894	1.06382
LYRM9	3	0.85272	0.85392	0.999709	16020	1	-3.1998	0.086384	0.08617	0.967039	1625	0	-3.1998	1.06357
EPHB2	3	0.27128	0.42301	0.999709	7917	1	-2.5012	0.086434	0.08622	0.967039	1626	0	-2.5012	1.06332
TMEM209	3	0.97093	0.97108	0.999709	18301	0	-3.0905	0.086484	0.086256	0.967039	1627	0	-3.0905	1.06306
NDUFS3	3	0.90208	0.90219	0.999709	16933	0	-3.9454	0.086534	0.086302	0.967039	1628	0	-3.9454	1.06281
AOC3	3	0.22573	0.37522	0.999709	6997	2	-4.5985	0.087211	0.086942	0.967039	1629	0	-4.5985	1.05943
ASPA	3	0.90635	0.90646	0.999709	17015	0	-2.901	0.087211	0.086942	0.967039	1630	0	-2.901	1.05943
GNB1L	3	0.028582	0.072041	0.941932	1429	1	-3.6399	0.087211	0.086942	0.967039	1631	0	-3.6399	1.05943
RNASE1	3	0.40145	0.55657	0.999709	10385	1	-3.761	0.087211	0.086942	0.967039	1632	0	-3.761	1.05943
OR4F5	3	0.98488	0.98505	0.999709	18578	0	-3.2898	0.087211	0.086942	0.967039	1633	0	-3.2898	1.05943
NUP88	3	0.15731	0.30208	0.999709	5630	1	-4.1805	0.087211	0.086942	0.967039	1634	0	-4.1805	1.05943
TRAT1	3	0.81124	0.8197	0.999709	15352	1	-3.7384	0.087211	0.086942	0.967039	1635	0	-3.7384	1.05943
REG4	3	0.55848	0.67902	0.999709	12715	1	-3.9414	0.087211	0.086942	0.967039	1636	0	-3.9414	1.05943
GBF1	3	0.27947	0.43155	0.999709	8076	1	-2.8083	0.087211	0.086942	0.967039	1637	0	-2.8083	1.05943
AMY2A	3	0.85024	0.8517	0.999709	15971	1	-3.8265	0.087211	0.086942	0.967039	1638	0	-3.8265	1.05943
RAD54L2	3	0.69367	0.74454	0.999709	13928	1	-3.9688	0.087211	0.086942	0.967039	1639	0	-3.9688	1.05943
PLEKHG7	3	0.83402	0.83784	0.999709	15716	1	-3.6879	0.087211	0.086942	0.967039	1640	0	-3.6879	1.05943
PCNA	3	0.13816	0.28135	0.999709	5280	2	-4.7435	0.087211	0.086942	0.967039	1641	0	-4.7435	1.05943
CCL8	3	0.95766	0.95793	0.999709	18031	0	-2.0675	0.087211	0.086942	0.967039	1642	0	-2.0675	1.05943
PLSCR1	3	0.22761	0.37721	0.999709	7039	2	-4.5959	0.087211	0.086942	0.967039	1643	0	-4.5959	1.05943
AKAIN1	3	0.95956	0.95981	0.999709	18075	0	-2.6632	0.087211	0.086942	0.967039	1644	0	-2.6632	1.05943
GJC3	3	0.52971	0.66691	0.999709	12486	1	-3.1598	0.087211	0.086942	0.967039	1645	0	-3.1598	1.05943
IL2	3	0.65429	0.72375	0.999709	13550	1	-2.3288	0.087211	0.086942	0.967039	1646	0	-2.3288	1.05943
NDUFA8	3	0.83601	0.83946	0.999709	15749	1	-3.575	0.087211	0.086942	0.967039	1647	0	-3.575	1.05943
NCOA1	3	0.64443	0.71887	0.999709	13452	1	-3.9688	0.087211	0.086942	0.967039	1648	0	-3.9688	1.05943
MCOLN3	3	0.99295	0.99309	0.999709	18748	0	-3.025	0.087211	0.086942	0.967039	1649	0	-3.025	1.05943
KRTAP13-3	3	0.99996	0.99996	1	18883	0	-1.9782	0.087211	0.086942	0.967039	1650	0	-1.9782	1.05943
HIST1H3D	1	0.91265	0.91307	0.999709	17141	0	-2.7825	0.087347	0.087321	0.967039	1651	0	-2.7825	1.05875
ARAF	3	0.929	0.92916	0.999709	17476	0	-3.9057	0.087887	0.087609	0.967039	1652	0	-3.9057	1.05608
TPSAB1	3	0.87274	0.87288	0.999709	16366	1	-2.7648	0.087937	0.087661	0.967039	1653	0	-2.7648	1.05583
IBSP	3	0.66069	0.72701	0.999709	13609	1	-4.0625	0.087987	0.087712	0.967039	1654	0	-4.0625	1.05558
PNMA1	3	0.91351	0.91362	0.999709	17164	0	-3.4562	0.088087	0.087818	0.967039	1655	0	-3.4562	1.05509
RBMXL1	3	0.3433	0.49749	0.999709	9322	1	-3.9217	0.088137	0.087862	0.967039	1656	0	-3.9217	1.05484
SETBP1	3	0.91332	0.91342	0.999709	17155	0	-2.6048	0.088187	0.087908	0.967039	1657	0	-2.6048	1.0546
LINGO2	3	0.06598	0.15372	0.990171	2902	1	-3.5753	0.088237	0.087958	0.967039	1658	0	-3.5753	1.05435
BRMS1	3	0.31436	0.4679	0.999709	8762	1	-4.0841	0.088288	0.088005	0.967039	1659	0	-4.0841	1.0541
COL5A2	3	0.28105	0.43322	0.999709	8103	2	-4.4537	0.088338	0.088055	0.967039	1660	0	-4.4537	1.05385
HDAC8	3	0.27895	0.43102	0.999709	8070	1	-3.7654	0.089038	0.088707	0.967039	1661	0	-3.7654	1.05042
LOC100130880	3	0.70039	0.74831	0.999709	14024	1	-3.6496	0.089038	0.088707	0.967039	1662	0	-3.6496	1.05042
BAMBI	3	0.33266	0.48659	0.999709	9124	2	-4.4428	0.089038	0.088707	0.967039	1663	0	-4.4428	1.05042
ZNF845	3	0.90064	0.90078	0.999709	16899	0	-4.0804	0.089038	0.088707	0.967039	1664	0	-4.0804	1.05042
AIFM3	3	0.17488	0.32103	0.999709	5979	1	-2.7861	0.089038	0.088707	0.967039	1665	0	-2.7861	1.05042
SLAMF6	3	0.60851	0.70151	0.999709	13148	1	-4.1571	0.089038	0.088707	0.967039	1666	0	-4.1571	1.05042
BICDL1	3	0.0322	0.080356	0.954745	1562	2	-5.0736	0.089038	0.088707	0.967039	1667	0	-5.0736	1.05042
DDIT3	3	0.91222	0.91233	0.999709	17122	0	-2.8429	0.089038	0.088707	0.967039	1668	0	-2.8429	1.05042
C11orf24	3	0.024162	0.061644	0.927072	1237	2	-4.2269	0.089038	0.088707	0.967039	1669	0	-4.2269	1.05042
DCTPP1	3	0.049327	0.11856	0.974717	2285	2	-4.996	0.089038	0.088707	0.967039	1670	0	-4.996	1.05042
ATG3	3	0.88679	0.8869	0.999709	16631	0	-3.7384	0.089038	0.088707	0.967039	1671	0	-3.7384	1.05042
RIPK4	3	0.94045	0.94062	0.999709	17699	0	-3.01	0.089038	0.088707	0.967039	1672	0	-3.01	1.05042
COMMD3-BMI1	3	0.9272	0.92732	0.999709	17441	0	-3.7833	0.089038	0.088707	0.967039	1673	0	-3.7833	1.05042
ZAR1L	3	0.19957	0.3476	0.999709	6475	2	-4.6404	0.089038	0.088707	0.967039	1674	0	-4.6404	1.05042
OXA1L	3	0.56104	0.68012	0.999709	12730	1	-3.4807	0.089038	0.088707	0.967039	1675	0	-3.4807	1.05042
DCDC5	3	0.47302	0.62815	0.999709	11733	2	-4.2525	0.089038	0.088707	0.967039	1676	0	-4.2525	1.05042
GRK3	3	0.0065841	0.017939	0.880817	374	2	-5.3196	0.089038	0.088707	0.967039	1677	0	-5.3196	1.05042
OPLAH	3	0.26625	0.41778	0.999709	7819	2	-4.537	0.089038	0.088707	0.967039	1678	0	-4.537	1.05042
RESP18	3	0.91749	0.91761	0.999709	17251	0	-2.2317	0.089038	0.088707	0.967039	1679	0	-2.2317	1.05042
SUPT4H1	3	0.094855	0.21105	0.995571	3952	1	-3.4029	0.089038	0.088707	0.967039	1680	0	-3.4029	1.05042
FCN3	3	0.19904	0.34703	0.999709	6456	1	-3.8221	0.089038	0.088707	0.967039	1681	0	-3.8221	1.05042
RBM25	3	0.92757	0.9277	0.999709	17443	0	-3.7788	0.089038	0.088707	0.967039	1682	0	-3.7788	1.05042
SLC17A4	3	0.23582	0.38588	0.999709	7196	2	-4.5835	0.089038	0.088707	0.967039	1683	0	-4.5835	1.05042
SFR1	3	0.35243	0.50683	0.999709	9475	1	-4.0662	0.089038	0.088707	0.967039	1684	0	-4.0662	1.05042
FAM83H	3	0.66417	0.7288	0.999709	13638	1	-3.5128	0.089739	0.089428	0.967039	1685	0	-3.5128	1.04702
PARD6B	3	0.26096	0.41229	0.999709	7702	2	-4.0989	0.089789	0.089475	0.967039	1686	0	-4.0989	1.04678
ZNF233	3	0.92783	0.92798	0.999709	17459	0	-3.4255	0.089839	0.089523	0.967039	1687	0	-3.4255	1.04654
PDK2	3	0.9513	0.95157	0.999709	17916	0	-3.1395	0.089889	0.089572	0.967039	1688	0	-3.1395	1.04629
PARP8	3	0.59577	0.69561	0.999709	13043	1	-4.1807	0.089939	0.089629	0.967039	1689	0	-4.1807	1.04605
CSTA	3	0.36671	0.52145	0.999709	9756	1	-3.0173	0.089989	0.089677	0.967039	1690	0	-3.0173	1.04581
PDHA1	3	0.79176	0.80561	0.999709	15081	1	-3.9495	0.090039	0.089722	0.967039	1691	0	-3.9495	1.04557
NPDC1	3	0.82982	0.83434	0.999709	15650	1	-2.9643	0.090089	0.089763	0.967039	1692	0	-2.9643	1.04533
KLRB1	3	0.48487	0.63983	0.999709	11949	1	-3.1667	0.090139	0.08981	0.967039	1693	0	-3.1667	1.04509
SUGCT	3	0.97435	0.97454	0.999709	18374	0	-2.8088	0.090189	0.089869	0.967039	1694	0	-2.8088	1.04485
VPS4B	3	0.10955	0.23883	0.995571	4470	2	-4.7346	0.090264	0.089935	0.967039	1695	0	-4.7346	1.04449
NSMCE2	3	0.73184	0.7666	0.999709	14374	1	-3.5342	0.090638	0.090296	0.967039	1696	0	-3.5342	1.04269
OTUD7B	3	0.019598	0.05057	0.925947	996	2	-4.2557	0.090638	0.090296	0.967039	1697	0	-4.2557	1.04269
POMT2	3	0.68043	0.73732	0.999709	13805	1	-3.1395	0.090638	0.090296	0.967039	1698	0	-3.1395	1.04269
FH	3	0.5767	0.68699	0.999709	12877	1	-3.5074	0.090638	0.090296	0.967039	1699	0	-3.5074	1.04269
HDDC2	3	0.37803	0.53284	0.999709	9965	1	-3.2325	0.090638	0.090296	0.967039	1700	0	-3.2325	1.04269
MRPS16	3	0.22729	0.37686	0.999709	7032	1	-3.9762	0.090638	0.090296	0.967039	1701	0	-3.9762	1.04269
DPYSL4	3	0.45417	0.60933	0.999709	11383	1	-3.783	0.090638	0.090296	0.967039	1702	0	-3.783	1.04269
HSD17B13	3	0.12785	0.27002	0.999709	5048	1	-3.01	0.090638	0.090296	0.967039	1703	0	-3.01	1.04269
COL9A2	3	0.83402	0.83784	0.999709	15715	1	-3.8728	0.090638	0.090296	0.967039	1704	0	-3.8728	1.04269
ADH7	3	0.82378	0.82956	0.999709	15541	1	-3.1852	0.090638	0.090296	0.967039	1705	0	-3.1852	1.04269
RIN1	3	0.39519	0.55023	0.999709	10272	1	-4.0218	0.090638	0.090296	0.967039	1706	0	-4.0218	1.04269
GCDH	3	0.98285	0.983	0.999709	18538	0	-3.0905	0.090638	0.090296	0.967039	1707	0	-3.0905	1.04269
RRAD	3	0.0089095	0.023957	0.912593	488	2	-5.2765	0.090638	0.090296	0.967039	1708	0	-5.2765	1.04269
STAC	3	0.40896	0.5642	0.999709	10520	1	-2.3549	0.090988	0.090659	0.967039	1709	0	-2.3549	1.04102
LOC285500	3	0.39989	0.55502	0.999709	10352	2	-4.3505	0.091038	0.090717	0.967039	1710	0	-4.3505	1.04078
RGS10	3	0.9777	0.97786	0.999709	18437	0	-3.2325	0.091088	0.090766	0.967039	1711	0	-3.2325	1.04054
CTSW	3	0.037147	0.091561	0.958624	1774	2	-4.9787	0.091138	0.090813	0.967039	1712	0	-4.9787	1.0403
DNPH1	3	0.78743	0.80259	0.999709	15024	1	-2.9876	0.091188	0.090856	0.967039	1713	0	-2.9876	1.04006
ERICH4	3	0.80988	0.81865	0.999709	15336	1	-4.1573	0.091238	0.090911	0.967039	1714	0	-4.1573	1.03982
NRAP	3	0.14923	0.29333	0.999709	5485	2	-4.4868	0.091288	0.09096	0.967039	1715	0	-4.4868	1.03959
TSGA10IP	3	0.067303	0.15644	0.990289	2953	1	-3.3017	0.091338	0.090998	0.967039	1716	0	-3.3017	1.03935
HOXB6	3	0.29212	0.44465	0.999709	8328	1	-3.7246	0.091388	0.09105	0.967039	1717	0	-3.7246	1.03911
LINC00452	2	0.97424	0.97414	0.999709	18371	0	-2.7915	0.091971	0.092006	0.967039	1718	0	-2.7915	1.03635
GALK2	2	0.68808	0.69113	0.999709	13880	1	-3.332	0.091971	0.092006	0.967039	1719	0	-3.332	1.03635
DNAJC24	2	0.80625	0.80567	0.999709	15288	0	-3.2094	0.091971	0.092006	0.967039	1720	0	-3.2094	1.03635
ZNF157	3	0.29462	0.44724	0.999709	8392	1	-3.6592	0.092062	0.091716	0.967039	1721	0	-3.6592	1.03592
IQCJ-SCHIP1	3	0.37075	0.52554	0.999709	9824	1	-3.7742	0.092062	0.091716	0.967039	1722	0	-3.7742	1.03592
MECP2	3	0.086775	0.19537	0.995571	3657	2	-4.8752	0.092062	0.091716	0.967039	1723	0	-4.8752	1.03592
ZMYM3	3	0.37749	0.53229	0.999709	9954	1	-2.614	0.092062	0.091716	0.967039	1724	0	-2.614	1.03592
ARNTL2	3	0.98096	0.9811	0.999709	18500	0	-2.9487	0.092062	0.091716	0.967039	1725	0	-2.9487	1.03592
PM20D2	3	0.47743	0.63256	0.999709	11816	2	-4.2463	0.092062	0.091716	0.967039	1726	0	-4.2463	1.03592
FAM169A	3	0.015786	0.041223	0.925947	824	2	-5.1894	0.092062	0.091716	0.967039	1727	0	-5.1894	1.03592
LRRC47	3	0.4228	0.57818	0.999709	10781	1	-4.0442	0.092062	0.091716	0.967039	1728	0	-4.0442	1.03592
SLC34A3	3	0.41435	0.56964	0.999709	10614	1	-2.9088	0.092062	0.091716	0.967039	1729	0	-2.9088	1.03592
HIPK3	3	0.40932	0.56457	0.999709	10525	2	-4.3386	0.092062	0.091716	0.967039	1730	0	-4.3386	1.03592
TGFBI	3	0.12298	0.26326	0.99798	4942	1	-3.7521	0.092062	0.091716	0.967039	1731	0	-3.7521	1.03592
RNF17	3	0.33232	0.48624	0.999709	9109	2	-4.4005	0.092062	0.091716	0.967039	1732	0	-4.4005	1.03592
S100Z	3	0.33681	0.49086	0.999709	9197	2	-4.4373	0.092062	0.091716	0.967039	1733	0	-4.4373	1.03592
ROR2	3	0.75456	0.78068	0.999709	14620	1	-4.1402	0.092062	0.091716	0.967039	1734	0	-4.1402	1.03592
RGSL1	3	0.89085	0.89092	0.999709	16716	0	-3.2898	0.092062	0.091716	0.967039	1735	0	-3.2898	1.03592
RNF103	3	0.45094	0.60607	0.999709	11323	1	-2.8058	0.092062	0.091716	0.967039	1736	0	-2.8058	1.03592
EHBP1L1	3	0.9392	0.93943	0.999709	17672	0	-3.5342	0.092062	0.091716	0.967039	1737	0	-3.5342	1.03592
PRADC1	3	0.95385	0.95417	0.999709	17961	0	-3.5546	0.092062	0.091716	0.967039	1738	0	-3.5546	1.03592
ZFYVE19	3	0.42426	0.57962	0.999709	10808	1	-3.4084	0.092062	0.091716	0.967039	1739	0	-3.4084	1.03592
CAMSAP1	3	0.25344	0.40444	0.999709	7550	2	-4.5556	0.092062	0.091716	0.967039	1740	0	-4.5556	1.03592
SYT11	3	0.10213	0.22491	0.995571	4210	1	-3.2894	0.092062	0.091716	0.967039	1741	0	-3.2894	1.03592
ZNRF2	3	0.17633	0.32261	0.999709	6012	2	-4.2302	0.092062	0.091716	0.967039	1742	0	-4.2302	1.03592
AFG3L2	3	0.75329	0.77987	0.999709	14618	1	-3.9093	0.092062	0.091716	0.967039	1743	0	-3.9093	1.03592
BACH2	3	0.66252	0.72794	0.999709	13624	1	-2.1357	0.092062	0.091716	0.967039	1744	0	-2.1357	1.03592
RIMBP3B	3	0.31485	0.46838	0.999709	8771	2	-4.4702	0.092736	0.092391	0.967039	1745	0	-4.4702	1.03275
KAT2A	3	0.36019	0.51481	0.999709	9627	1	-4.1017	0.092786	0.09244	0.967039	1746	0	-4.1017	1.03252
POMP	3	0.060552	0.14254	0.987453	2703	1	-3.9881	0.092836	0.092482	0.967039	1747	0	-3.9881	1.03228
CRELD1	3	0.97454	0.97472	0.999709	18376	0	-2.1654	0.092886	0.09253	0.967039	1748	0	-2.1654	1.03205
CEP44	2	0.80992	0.8094	0.999709	15337	0	-3.216	0.093358	0.093402	0.967039	1749	0	-3.216	1.02985
ERP44	1	0.90654	0.90699	0.999709	17016	0	-2.8172	0.093462	0.09344	0.967039	1750	0	-2.8172	1.02936
IL34	3	0.74503	0.7747	0.999709	14531	1	-3.5753	0.095253	0.09487	0.967039	1751	0	-3.5753	1.02112
WWP1	3	0.59452	0.69505	0.999709	13035	1	-3.6638	0.095253	0.09487	0.967039	1752	0	-3.6638	1.02112
ENDOU	3	0.79461	0.80761	0.999709	15125	1	-2.5639	0.095253	0.09487	0.967039	1753	0	-2.5639	1.02112
SNCA	3	0.63791	0.71565	0.999709	13390	1	-2.9718	0.095253	0.09487	0.967039	1754	0	-2.9718	1.02112
RABL3	3	0.30306	0.45612	0.999709	8564	1	-2.0822	0.095253	0.09487	0.967039	1755	0	-2.0822	1.02112
GPX2	3	0.21122	0.36002	0.999709	6703	1	-3.4863	0.095253	0.09487	0.967039	1756	0	-3.4863	1.02112
ROM1	3	0.95299	0.9533	0.999709	17945	0	-3.6876	0.095253	0.09487	0.967039	1757	0	-3.6876	1.02112
FAM26D	3	0.773	0.79271	0.999709	14836	1	-3.6057	0.095253	0.09487	0.967039	1758	0	-3.6057	1.02112
CYBB	3	0.60475	0.69975	0.999709	13122	1	-3.0473	0.095253	0.09487	0.967039	1759	0	-3.0473	1.02112
ARHGEF15	3	0.91643	0.91649	0.999709	17234	0	-4.066	0.095253	0.09487	0.967039	1760	0	-4.066	1.02112
TBL3	3	0.76595	0.78806	0.999709	14751	1	-3.0173	0.095253	0.09487	0.967039	1761	0	-3.0173	1.02112
EFNA2	3	0.39055	0.54557	0.999709	10185	1	-3.6638	0.095253	0.09487	0.967039	1762	0	-3.6638	1.02112
CFAP126	3	0.058507	0.13826	0.985438	2627	1	-3.3795	0.095253	0.09487	0.967039	1763	0	-3.3795	1.02112
NR2E3	3	0.56254	0.68074	0.999709	12744	1	-3.397	0.095253	0.09487	0.967039	1764	0	-3.397	1.02112
URAD	3	0.94965	0.94986	0.999709	17871	0	-2.9725	0.095253	0.09487	0.967039	1765	0	-2.9725	1.02112
CADM3	3	0.92649	0.92662	0.999709	17426	0	-3.8894	0.095253	0.09487	0.967039	1766	0	-3.8894	1.02112
ZNHIT2	3	0.81391	0.82172	0.999709	15392	1	-2.644	0.095253	0.09487	0.967039	1767	0	-2.644	1.02112
PCBD2	3	0.99162	0.99174	0.999709	18714	0	-3.0693	0.095253	0.09487	0.967039	1768	0	-3.0693	1.02112
PPM1K	3	0.11986	0.25762	0.995571	4834	1	-2.8178	0.095253	0.09487	0.967039	1769	0	-2.8178	1.02112
RAB5C	3	0.60475	0.69975	0.999709	13123	1	-2.7009	0.095253	0.09487	0.967039	1770	0	-2.7009	1.02112
BCAN	3	0.8248	0.83032	0.999709	15562	1	-3.5903	0.095253	0.09487	0.967039	1771	0	-3.5903	1.02112
SLC26A1	3	0.5119	0.65961	0.999709	12338	1	-3.431	0.095253	0.09487	0.967039	1772	0	-3.431	1.02112
SYS1	3	0.14449	0.28819	0.999709	5399	1	-3.29	0.095253	0.09487	0.967039	1773	0	-3.29	1.02112
ALDH9A1	3	0.96845	0.96865	0.999709	18238	0	-3.6542	0.095253	0.09487	0.967039	1774	0	-3.6542	1.02112
POLN	3	0.75527	0.78116	0.999709	14629	1	-3.3798	0.095253	0.09487	0.967039	1775	0	-3.3798	1.02112
C11orf49	3	0.93745	0.93765	0.999709	17640	0	-3.7015	0.095253	0.09487	0.967039	1776	0	-3.7015	1.02112
RHBDL1	3	0.99506	0.99518	0.999852	18793	0	-2.7648	0.095253	0.09487	0.967039	1777	0	-2.7648	1.02112
RNF41	3	0.88951	0.88956	0.999709	16686	0	-3.5288	0.095253	0.09487	0.967039	1778	0	-3.5288	1.02112
KDM2B	3	0.47025	0.6254	0.999709	11694	2	-4.2557	0.095253	0.09487	0.967039	1779	0	-4.2557	1.02112
CGB1	3	0.034211	0.084905	0.957159	1651	2	-4.7904	0.095253	0.09487	0.967039	1780	0	-4.7904	1.02112
HEATR5A	3	0.30367	0.45677	0.999709	8569	2	-4.484	0.095253	0.09487	0.967039	1781	0	-4.484	1.02112
SEL1L3	3	0.98576	0.9859	0.999709	18601	0	-2.9406	0.095253	0.09487	0.967039	1782	0	-2.9406	1.02112
TNPO3	3	0.36218	0.51684	0.999709	9663	1	-3.7699	0.095253	0.09487	0.967039	1783	0	-3.7699	1.02112
C1GALT1C1L	3	0.71784	0.75827	0.999709	14214	1	-3.308	0.095253	0.09487	0.967039	1784	0	-3.308	1.02112
NDUFC2-KCTD14	3	0.4868	0.64173	0.999709	11987	2	-4.2333	0.095253	0.09487	0.967039	1785	0	-4.2333	1.02112
EPB41	3	0.29796	0.45082	0.999709	8460	2	-4.4315	0.095253	0.09487	0.967039	1786	0	-4.4315	1.02112
SPATA2L	3	0.88284	0.88291	0.999709	16549	0	-2.7193	0.095253	0.09487	0.967039	1787	0	-2.7193	1.02112
PDLIM5	3	0.91289	0.913	0.999709	17144	0	-3.8768	0.095253	0.09487	0.967039	1788	0	-3.8768	1.02112
OGDHL	3	0.45506	0.61024	0.999709	11405	2	-4.2748	0.095253	0.09487	0.967039	1789	0	-4.2748	1.02112
POTEA	3	0.77173	0.79189	0.999709	14817	1	-3.5903	0.095253	0.09487	0.967039	1790	0	-3.5903	1.02112
OR2J2	3	0.43083	0.58611	0.999709	10954	1	-3.8973	0.095253	0.09487	0.967039	1791	0	-3.8973	1.02112
SLC25A21	3	0.81225	0.82048	0.999709	15368	1	-4.0146	0.095253	0.09487	0.967039	1792	0	-4.0146	1.02112
BIN3	3	0.66954	0.73158	0.999709	13693	1	-3.8005	0.095253	0.09487	0.967039	1793	0	-3.8005	1.02112
CCDC120	3	0.6033	0.69907	0.999709	13104	1	-4.0734	0.095253	0.09487	0.967039	1794	0	-4.0734	1.02112
DNAJB2	3	0.65547	0.72437	0.999709	13559	1	-2.5168	0.095253	0.09487	0.967039	1795	0	-2.5168	1.02112
TOM1L2	3	0.96311	0.96334	0.999709	18145	0	-2.9171	0.095253	0.09487	0.967039	1796	0	-2.9171	1.02112
PHC2	3	0.63124	0.71237	0.999709	13330	1	-2.6632	0.095253	0.09487	0.967039	1797	0	-2.6632	1.02112
ANKRD9	3	0.99943	0.99944	1	18867	0	-2.0822	0.095253	0.09487	0.967039	1798	0	-2.0822	1.02112
MTMR9	3	0.98082	0.98096	0.999709	18495	0	-2.4797	0.095253	0.09487	0.967039	1799	0	-2.4797	1.02112
RAB3IP	3	0.41338	0.56867	0.999709	10604	1	-3.1801	0.095253	0.09487	0.967039	1800	0	-3.1801	1.02112
DDX46	3	0.76412	0.78689	0.999709	14733	1	-4.1087	0.095253	0.09487	0.967039	1801	0	-4.1087	1.02112
MXRA7	3	0.38616	0.54114	0.999709	10103	1	-3.6736	0.095253	0.09487	0.967039	1802	0	-3.6736	1.02112
OR13F1	3	0.85752	0.85827	0.999709	16099	1	-2.4761	0.095253	0.09487	0.967039	1803	0	-2.4761	1.02112
BLNK	3	0.79758	0.80969	0.999709	15173	1	-3.7608	0.095253	0.09487	0.967039	1804	0	-3.7608	1.02112
KRTAP22-1	3	0.27324	0.42504	0.999709	7961	1	-2.8926	0.095253	0.09487	0.967039	1805	0	-2.8926	1.02112
PCDHGB5	3	0.90693	0.90703	0.999709	17022	0	-2.9876	0.095253	0.09487	0.967039	1806	0	-2.9876	1.02112
KATNAL1	3	0.36809	0.52282	0.999709	9783	2	-4.3919	0.095253	0.09487	0.967039	1807	0	-4.3919	1.02112
TFEC	3	0.98626	0.98642	0.999709	18611	0	-2.7104	0.095253	0.09487	0.967039	1808	0	-2.7104	1.02112
FCAMR	3	0.010247	0.027406	0.916236	555	2	-5.2559	0.095253	0.09487	0.967039	1809	0	-5.2559	1.02112
HEPN1	3	0.21208	0.36092	0.999709	6723	1	-3.1324	0.095253	0.09487	0.967039	1810	0	-3.1324	1.02112
C1orf158	3	0.89768	0.89778	0.999709	16844	0	-3.4255	0.095253	0.09487	0.967039	1811	0	-3.4255	1.02112
POLR2H	3	0.65796	0.72562	0.999709	13580	1	-3.4967	0.095253	0.09487	0.967039	1812	0	-3.4967	1.02112
DMXL2	3	0.4579	0.61311	0.999709	11457	2	-4.2715	0.095253	0.09487	0.967039	1813	0	-4.2715	1.02112
ITGA1	3	0.21069	0.35948	0.999709	6690	2	-4.6209	0.095253	0.09487	0.967039	1814	0	-4.6209	1.02112
ERVMER34-1	3	0.90327	0.90334	0.999709	16951	0	-3.5288	0.095253	0.09487	0.967039	1815	0	-3.5288	1.02112
NFATC2IP	3	0.87551	0.87564	0.999709	16417	0	-3.6687	0.095253	0.09487	0.967039	1816	0	-3.6687	1.02112
RAB39B	3	0.70039	0.74831	0.999709	14021	1	-2.9563	0.095253	0.09487	0.967039	1817	0	-2.9563	1.02112
TRPV5	3	0.23031	0.38	0.999709	7098	1	-2.8597	0.095253	0.09487	0.967039	1818	0	-2.8597	1.02112
MAGEA10-MAGEA5	3	0.66252	0.72794	0.999709	13626	1	-3.7205	0.095253	0.09487	0.967039	1819	0	-3.7205	1.02112
DNAL4	3	0.96146	0.96171	0.999709	18110	0	-3.4915	0.095253	0.09487	0.967039	1820	0	-3.4915	1.02112
LRRC56	3	0.82056	0.82699	0.999709	15492	1	-2.8083	0.095253	0.09487	0.967039	1821	0	-2.8083	1.02112
VSIG10	3	0.27213	0.42387	0.999709	7932	2	-4.2683	0.095253	0.09487	0.967039	1822	0	-4.2683	1.02112
PSMD8	3	0.82891	0.83362	0.999709	15628	1	-2.8429	0.095253	0.09487	0.967039	1823	0	-2.8429	1.02112
TMEM27	3	0.86891	0.86908	0.999709	16305	1	-3.5499	0.095253	0.09487	0.967039	1824	0	-3.5499	1.02112
PRR35	3	0.39723	0.55234	0.999709	10311	1	-4.0369	0.095253	0.09487	0.967039	1825	0	-4.0369	1.02112
GSTO2	3	0.81271	0.82082	0.999709	15373	1	-3.2391	0.095253	0.09487	0.967039	1826	0	-3.2391	1.02112
STRADA	3	0.26854	0.42014	0.999709	7870	2	-4.532	0.095253	0.09487	0.967039	1827	0	-4.532	1.02112
PSMB9	3	0.22061	0.36986	0.999709	6888	1	-3.835	0.095253	0.09487	0.967039	1828	0	-3.835	1.02112
ARMS2	3	0.83157	0.83582	0.999709	15675	1	-3.7742	0.095253	0.09487	0.967039	1829	0	-3.7742	1.02112
IL17D	3	0.082041	0.18618	0.995571	3479	1	-4.0588	0.095253	0.09487	0.967039	1830	0	-4.0588	1.02112
EXOC3L4	3	0.23811	0.38827	0.999709	7239	2	-4.5807	0.095253	0.09487	0.967039	1831	0	-4.5807	1.02112
C11orf68	3	0.98995	0.99008	0.999709	18681	0	-2.7249	0.095253	0.09487	0.967039	1832	0	-2.7249	1.02112
ZDHHC5	3	0.42491	0.58022	0.999709	10816	1	-2.7999	0.095253	0.09487	0.967039	1833	0	-2.7999	1.02112
USP5	3	0.46045	0.61564	0.999709	11492	2	-4.2683	0.095253	0.09487	0.967039	1834	0	-4.2683	1.02112
MAF	2	0.67928	0.68332	0.999709	13789	1	-3.3574	0.095503	0.095558	0.967039	1835	0	-3.3574	1.01998
SEMA6A	3	0.1723	0.31825	0.999709	5914	2	-4.4032	0.097667	0.09726	0.967039	1836	0	-4.4032	1.01025
HIST1H2BF	1	0.90231	0.90277	0.999709	16938	0	-2.8677	0.097695	0.097677	0.967039	1837	0	-2.8677	1.01013
PCDH12	3	0.42917	0.58449	0.999709	10917	2	-4.3116	0.097717	0.097317	0.967039	1838	0	-4.3116	1.01003
OST4	3	0.96438	0.96459	0.999709	18166	0	-3.818	0.097816	0.097409	0.967039	1839	0	-3.818	1.00959
SKIV2L	1	0.90163	0.9021	0.999709	16924	0	-2.8762	0.098369	0.09836	0.967039	1840	0	-2.8762	1.00714
CWC27	2	0.58929	0.60898	0.999709	12983	1	-3.4494	0.10029	0.1003	0.967039	1841	0	-3.4494	0.998742
USP17L24	1	0.89925	0.89975	0.999709	16872	0	-2.9005	0.10075	0.10079	0.967039	1842	0	-2.9005	0.996755
FAM217B	3	0.63295	0.71322	0.999709	13344	1	-2.9248	0.10129	0.10093	0.967039	1843	0	-2.9248	0.994433
SH3RF3	3	0.33745	0.49151	0.999709	9202	1	-3.7384	0.10129	0.10093	0.967039	1844	0	-3.7384	0.994433
ALYREF	3	0.44906	0.6042	0.999709	11274	1	-3.2457	0.10129	0.10093	0.967039	1845	0	-3.2457	0.994433
ERCC6L2	3	0.46571	0.62086	0.999709	11592	2	-4.262	0.10129	0.10093	0.967039	1846	0	-4.262	0.994433
FOLH1	3	0.10873	0.23728	0.995571	4441	1	-3.6687	0.10129	0.10093	0.967039	1847	0	-3.6687	0.994433
SAG	3	0.83289	0.8369	0.999709	15693	1	-4.194	0.10129	0.10093	0.967039	1848	0	-4.194	0.994433
SETD7	3	0.40513	0.56037	0.999709	10444	1	-3.9135	0.10129	0.10093	0.967039	1849	0	-3.9135	0.994433
HIST1H1C	3	0.93449	0.93467	0.999709	17579	0	-2.2694	0.10129	0.10093	0.967039	1850	0	-2.2694	0.994433
EIF1AX	3	0.89624	0.89637	0.999709	16809	0	-3.9765	0.10129	0.10093	0.967039	1851	0	-3.9765	0.994433
TDRD6	3	0.71983	0.75944	0.999709	14242	1	-3.1532	0.10129	0.10093	0.967039	1852	0	-3.1532	0.994433
TEX15	3	0.99745	0.99748	1	18837	0	-2.901	0.10129	0.10093	0.967039	1853	0	-2.901	0.994433
POLR2E	3	0.38489	0.53986	0.999709	10081	2	-4.3685	0.10129	0.10093	0.967039	1854	0	-4.3685	0.994433
EML1	3	0.34045	0.4946	0.999709	9275	2	-3.8606	0.10129	0.10093	0.967039	1855	0	-3.8606	0.994433
CECR6	3	0.040469	0.099111	0.958624	1920	2	-5.0317	0.10129	0.10093	0.967039	1856	0	-5.0317	0.994433
GPHN	3	0.16283	0.30802	0.999709	5731	1	-4.0875	0.10129	0.10093	0.967039	1857	0	-4.0875	0.994433
LARGE2	3	0.79342	0.80676	0.999709	15102	1	-4.0404	0.10129	0.10093	0.967039	1858	0	-4.0404	0.994433
SSFA2	3	0.3016	0.45463	0.999709	8540	1	-4.0185	0.10129	0.10093	0.967039	1859	0	-4.0185	0.994433
SRSF9	3	0.26445	0.41587	0.999709	7779	1	-4.1123	0.10129	0.10093	0.967039	1860	0	-4.1123	0.994433
NPFFR2	3	0.36117	0.51583	0.999709	9645	2	-4.4032	0.10129	0.10093	0.967039	1861	0	-4.4032	0.994433
CDRT4	3	0.66069	0.72701	0.999709	13612	1	-3.0905	0.10129	0.10093	0.967039	1862	0	-3.0905	0.994433
OR11H12	3	0.98508	0.98525	0.999709	18582	0	-3.575	0.10129	0.10093	0.967039	1863	0	-3.575	0.994433
C11orf58	3	0.85852	0.85921	0.999709	16111	1	-3.4642	0.10129	0.10093	0.967039	1864	0	-3.4642	0.994433
WDR72	3	0.99697	0.99701	0.999916	18830	0	-3.1395	0.10129	0.10093	0.967039	1865	0	-3.1395	0.994433
ARPP21	3	0.22299	0.37232	0.999709	6945	2	-4.6033	0.10129	0.10093	0.967039	1866	0	-4.6033	0.994433
RNF40	3	0.55574	0.67788	0.999709	12696	1	-3.7246	0.10129	0.10093	0.967039	1867	0	-3.7246	0.994433
CRLS1	3	0.85952	0.86013	0.999709	16133	1	-3.4807	0.10129	0.10093	0.967039	1868	0	-3.4807	0.994433
RSAD1	3	0.94079	0.94095	0.999709	17702	0	-3.4755	0.10129	0.10093	0.967039	1869	0	-3.4755	0.994433
NELFCD	3	0.9759	0.97609	0.999709	18401	0	-3.4425	0.10129	0.10093	0.967039	1870	0	-3.4425	0.994433
HCN2	3	0.68274	0.73856	0.999709	13828	1	-4.0069	0.10129	0.10093	0.967039	1871	0	-4.0069	0.994433
GP6	3	0.02657	0.067347	0.928212	1345	2	-4.924	0.10129	0.10093	0.967039	1872	0	-4.924	0.994433
STK39	3	0.38489	0.53986	0.999709	10088	2	-4.3685	0.10129	0.10093	0.967039	1873	0	-4.3685	0.994433
H2AFY2	3	0.75711	0.78235	0.999709	14653	1	-4.0032	0.10129	0.10093	0.967039	1874	0	-4.0032	0.994433
SYCE2	3	0.93745	0.93765	0.999709	17639	0	-3.8894	0.10129	0.10093	0.967039	1875	0	-3.8894	0.994433
MUC20	3	0.30506	0.45827	0.999709	8591	2	-4.4814	0.10129	0.10093	0.967039	1876	0	-4.4814	0.994433
RNF151	3	0.55154	0.6761	0.999709	12662	1	-2.5744	0.10129	0.10093	0.967039	1877	0	-2.5744	0.994433
IQSEC1	3	0.62058	0.70718	0.999709	13250	1	-3.7875	0.10129	0.10093	0.967039	1878	0	-3.7875	0.994433
DHRS7	3	0.0022173	0.0062455	0.873429	124	2	-5.4556	0.10129	0.10093	0.967039	1879	0	-5.4556	0.994433
KRT82	3	0.46771	0.62285	0.999709	11637	1	-3.8931	0.10129	0.10093	0.967039	1880	0	-3.8931	0.994433
SMIM18	3	0.081839	0.18575	0.995571	3471	1	-3.9454	0.10129	0.10093	0.967039	1881	0	-3.9454	0.994433
NTRK1	3	0.40272	0.5579	0.999709	10406	2	-4.3449	0.10129	0.10093	0.967039	1882	0	-4.3449	0.994433
LMBR1L	3	0.86379	0.86412	0.999709	16211	1	-2.7104	0.10129	0.10093	0.967039	1883	0	-2.7104	0.994433
IFNA1	3	0.77414	0.79347	0.999709	14847	1	-3.9137	0.10129	0.10093	0.967039	1884	0	-3.9137	0.994433
BNC1	3	0.81837	0.82521	0.999709	15456	1	-2.3549	0.10129	0.10093	0.967039	1885	0	-2.3549	0.994433
ARL13B	3	0.8133	0.82126	0.999709	15381	1	-3.697	0.10129	0.10093	0.967039	1886	0	-3.697	0.994433
TMEM232	3	0.87086	0.87101	0.999709	16339	1	-3.6396	0.10129	0.10093	0.967039	1887	0	-3.6396	0.994433
WDR35	3	0.092012	0.20557	0.995571	3838	1	-3.6972	0.10129	0.10093	0.967039	1888	0	-3.6972	0.994433
SLC27A6	3	0.18233	0.32914	0.999709	6128	1	-4.13	0.10129	0.10093	0.967039	1889	0	-4.13	0.994433
TMEM257	3	0.72568	0.76292	0.999709	14317	1	-4.1908	0.10129	0.10093	0.967039	1890	0	-4.1908	0.994433
RGS19	3	0.86013	0.8607	0.999709	16147	1	-2.2317	0.10129	0.10093	0.967039	1891	0	-2.2317	0.994433
TRIM72	3	0.25797	0.4092	0.999709	7637	1	-3.2002	0.10129	0.10093	0.967039	1892	0	-3.2002	0.994433
TAAR6	3	0.85024	0.8517	0.999709	15977	1	-3.669	0.10129	0.10093	0.967039	1893	0	-3.669	0.994433
GPD2	3	0.56673	0.68257	0.999709	12781	1	-4.0769	0.10129	0.10093	0.967039	1894	0	-4.0769	0.994433
NT5E	3	0.2143	0.36328	0.999709	6781	1	-3.957	0.10129	0.10093	0.967039	1895	0	-3.957	0.994433
ETV3	3	0.6793	0.73674	0.999709	13795	1	-3.2329	0.10129	0.10093	0.967039	1896	0	-3.2329	0.994433
RPUSD2	3	0.096946	0.21503	0.995571	4023	1	-2.5639	0.10129	0.10093	0.967039	1897	0	-2.5639	0.994433
TERF2IP	3	0.96913	0.96933	0.999709	18255	0	-3.2262	0.10129	0.10093	0.967039	1898	0	-3.2262	0.994433
CLEC1B	3	0.92298	0.92311	0.999709	17363	0	-3.0832	0.10129	0.10093	0.967039	1899	0	-3.0832	0.994433
NMT1	3	0.91163	0.91174	0.999709	17116	0	-3.532	0.10129	0.10093	0.967039	1900	0	-3.532	0.994433
SLC30A6	3	0.40268	0.55786	0.999709	10400	1	-2.8046	0.10129	0.10093	0.967039	1901	0	-2.8046	0.994433
TMEFF1	3	0.20351	0.35189	0.999709	6546	2	-4.0379	0.10129	0.10093	0.967039	1902	0	-4.0379	0.994433
METTL25	3	0.17372	0.31978	0.999709	5952	2	-4.6858	0.10129	0.10093	0.967039	1903	0	-4.6858	0.994433
RABAC1	3	0.89624	0.89637	0.999709	16811	0	-3.877	0.10129	0.10093	0.967039	1904	0	-3.877	0.994433
ADGRF2	3	0.066666	0.15511	0.990251	2929	2	-4.9339	0.10129	0.10093	0.967039	1905	0	-4.9339	0.994433
PSAPL1	3	0.49904	0.65386	0.999709	12229	1	-3.7878	0.10129	0.10093	0.967039	1906	0	-3.7878	0.994433
SDC1	3	0.14724	0.29122	0.999709	5452	1	-3.2262	0.10129	0.10093	0.967039	1907	0	-3.2262	0.994433
GPR150	3	0.48499	0.63995	0.999709	11954	2	-4.2364	0.10129	0.10093	0.967039	1908	0	-4.2364	0.994433
ZNF596	3	0.19866	0.34662	0.999709	6448	2	-4.6427	0.10129	0.10093	0.967039	1909	0	-4.6427	0.994433
YIF1A	3	0.054605	0.12997	0.980259	2488	2	-3.5869	0.10129	0.10093	0.967039	1910	0	-3.5869	0.994433
SPDYE5	3	0.57037	0.68418	0.999709	12809	1	-3.5652	0.10129	0.10093	0.967039	1911	0	-3.5652	0.994433
JAK3	3	0.93688	0.93709	0.999709	17638	0	-3.5805	0.10129	0.10093	0.967039	1912	0	-3.5805	0.994433
ANO8	3	0.85365	0.85479	0.999709	16035	1	-3.8391	0.10129	0.10093	0.967039	1913	0	-3.8391	0.994433
WDR31	3	0.2992	0.45208	0.999709	8482	1	-3.4255	0.10129	0.10093	0.967039	1914	0	-3.4255	0.994433
SRSF12	3	0.64443	0.71887	0.999709	13451	1	-3.3322	0.10129	0.10093	0.967039	1915	0	-3.3322	0.994433
SUCLG2	3	0.35581	0.51032	0.999709	9544	1	-4.1874	0.10129	0.10093	0.967039	1916	0	-4.1874	0.994433
ZSCAN29	3	0.16043	0.30537	0.999709	5690	2	-4.7116	0.10129	0.10093	0.967039	1917	0	-4.7116	0.994433
C4orf47	3	0.82689	0.83196	0.999709	15595	1	-3.6252	0.10129	0.10093	0.967039	1918	0	-3.6252	0.994433
MTRNR2L7	3	0.62589	0.70978	0.999709	13294	1	-2.1105	0.10129	0.10093	0.967039	1919	0	-2.1105	0.994433
COPB1	3	0.35209	0.50647	0.999709	9472	2	-4.415	0.10129	0.10093	0.967039	1920	0	-4.415	0.994433
CDK19	3	0.97229	0.97247	0.999709	18333	0	-2.3162	0.10129	0.10093	0.967039	1921	0	-2.3162	0.994433
TMEM39B	3	0.57429	0.6859	0.999709	12850	1	-3.9297	0.10129	0.10093	0.967039	1922	0	-3.9297	0.994433
IL17RC	3	0.50622	0.65732	0.999709	12297	1	-3.0543	0.10129	0.10093	0.967039	1923	0	-3.0543	0.994433
ITPRIP	3	0.69891	0.74746	0.999709	14009	1	-3.308	0.10129	0.10093	0.967039	1924	0	-3.308	0.994433
EP400	3	0.6747	0.73426	0.999709	13742	1	-3.4755	0.10129	0.10093	0.967039	1925	0	-3.4755	0.994433
PCDH17	3	0.36427	0.51898	0.999709	9707	1	-3.3384	0.10129	0.10093	0.967039	1926	0	-3.3384	0.994433
DEPDC1B	3	0.94525	0.94544	0.999709	17782	0	-3.4144	0.10129	0.10093	0.967039	1927	0	-3.4144	0.994433
LRP11	3	0.71528	0.75676	0.999709	14196	1	-3.308	0.10129	0.10093	0.967039	1928	0	-3.308	0.994433
BHLHE40	3	0.53168	0.66775	0.999709	12504	1	-4.1906	0.10129	0.10093	0.967039	1929	0	-4.1906	0.994433
COL5A1	3	0.262	0.41339	0.999709	7726	1	-3.1736	0.10129	0.10093	0.967039	1930	0	-3.1736	0.994433
PHYKPL	3	0.3192	0.47283	0.999709	8864	2	-4.4622	0.10129	0.10093	0.967039	1931	0	-4.4622	0.994433
NSUN5	3	0.016524	0.043079	0.925947	858	2	-5.1829	0.10129	0.10093	0.967039	1932	0	-5.1829	0.994433
NCAPD2	3	0.35839	0.51299	0.999709	9586	1	-3.3678	0.10129	0.10093	0.967039	1933	0	-3.3678	0.994433
SLC15A4	3	0.062899	0.14739	0.990171	2772	1	-2.2694	0.10129	0.10093	0.967039	1934	0	-2.2694	0.994433
CDYL	3	0.70249	0.7495	0.999709	14048	1	-3.497	0.10129	0.10093	0.967039	1935	0	-3.497	0.994433
PRSS55	3	0.073754	0.16951	0.995571	3170	2	-4.912	0.10129	0.10093	0.967039	1936	0	-4.912	0.994433
ARF5	3	0.77648	0.79505	0.999709	14874	1	-4.1053	0.10129	0.10093	0.967039	1937	0	-4.1053	0.994433
COL12A1	3	0.1124	0.24407	0.995571	4571	1	-4.1364	0.10129	0.10093	0.967039	1938	0	-4.1364	0.994433
PGK1	3	0.89936	0.89952	0.999709	16877	0	-4.0515	0.10129	0.10093	0.967039	1939	0	-4.0515	0.994433
STRIP1	3	0.9545	0.95481	0.999709	17978	0	-3.761	0.10129	0.10093	0.967039	1940	0	-3.761	0.994433
SMR3B	3	0.63835	0.71588	0.999709	13393	1	-3.9137	0.10129	0.10093	0.967039	1941	0	-3.9137	0.994433
ACPP	3	0.91966	0.91972	0.999709	17292	0	-4.0071	0.10129	0.10093	0.967039	1942	0	-4.0071	0.994433
TM2D3	3	0.74834	0.7768	0.999709	14561	1	-3.711	0.10129	0.10093	0.967039	1943	0	-3.711	0.994433
TEX11	3	0.17915	0.32564	0.999709	6057	2	-4.6764	0.10129	0.10093	0.967039	1944	0	-4.6764	0.994433
PSMG4	3	0.023682	0.060504	0.925947	1219	2	-5.1234	0.10129	0.10093	0.967039	1945	0	-5.1234	0.994433
CD248	3	0.14312	0.28674	0.999709	5370	2	-4.7435	0.10129	0.10093	0.967039	1946	0	-4.7435	0.994433
ITGB6	3	0.93082	0.93095	0.999709	17511	0	-3.5074	0.10129	0.10093	0.967039	1947	0	-3.5074	0.994433
AAMP	3	0.22426	0.37363	0.999709	6965	2	-4.2366	0.10129	0.10093	0.967039	1948	0	-4.2366	0.994433
USP44	3	0.52695	0.66576	0.999709	12465	1	-4.1435	0.10129	0.10093	0.967039	1949	0	-4.1435	0.994433
OR4D6	3	0.70404	0.75039	0.999709	14062	1	-4.207	0.10129	0.10093	0.967039	1950	0	-4.207	0.994433
WASHC2A	3	0.19481	0.34255	0.999709	6379	2	-4.6479	0.10129	0.10093	0.967039	1951	0	-4.6479	0.994433
ADCK2	3	0.39439	0.54943	0.999709	10260	1	-4.1367	0.10129	0.10093	0.967039	1952	0	-4.1367	0.994433
OR5H2	3	0.96438	0.96459	0.999709	18168	0	-2.6048	0.10129	0.10093	0.967039	1953	0	-2.6048	0.994433
HSD17B4	3	0.68894	0.74192	0.999709	13893	1	-3.0688	0.10129	0.10093	0.967039	1954	0	-3.0688	0.994433
MORN4	3	0.39342	0.54846	0.999709	10240	2	-4.3568	0.10129	0.10093	0.967039	1955	0	-4.3568	0.994433
KLHL32	3	0.80224	0.81302	0.999709	15232	1	-3.969	0.10129	0.10093	0.967039	1956	0	-3.969	0.994433
CDH11	3	0.28478	0.43706	0.999709	8192	1	-3.4755	0.10129	0.10093	0.967039	1957	0	-3.4755	0.994433
BLOC1S4	3	0.75329	0.77987	0.999709	14616	1	-3.6054	0.10129	0.10093	0.967039	1958	0	-3.6054	0.994433
CNNM4	3	0.80932	0.81825	0.999709	15328	1	-3.9918	0.10129	0.10093	0.967039	1959	0	-3.9918	0.994433
KLHL9	3	0.46504	0.62023	0.999709	11585	2	-4.2622	0.10129	0.10093	0.967039	1960	0	-4.2622	0.994433
HPS6	3	0.94632	0.94652	0.999709	17802	0	-2.7009	0.10129	0.10093	0.967039	1961	0	-2.7009	0.994433
HLA-DRB3	3	0.37842	0.53322	0.999709	9978	2	-4.3023	0.10129	0.10093	0.967039	1962	0	-4.3023	0.994433
CAT	3	0.13641	0.27946	0.999709	5235	2	-4.7571	0.10129	0.10093	0.967039	1963	0	-4.7571	0.994433
PRH1	3	0.03377	0.083899	0.957159	1630	2	-5.0646	0.10129	0.10093	0.967039	1964	0	-5.0646	0.994433
C10orf35	3	0.94706	0.94726	0.999709	17815	0	-2.6913	0.10129	0.10093	0.967039	1965	0	-2.6913	0.994433
VAX1	3	0.96638	0.9666	0.999709	18202	0	-3.283	0.10129	0.10093	0.967039	1966	0	-3.283	0.994433
C1orf123	3	0.82891	0.83362	0.999709	15626	1	-3.7294	0.10129	0.10093	0.967039	1967	0	-3.7294	0.994433
KLHL2	3	0.39246	0.5475	0.999709	10217	2	-4.2588	0.10129	0.10093	0.967039	1968	0	-4.2588	0.994433
LINGO3	3	0.63835	0.71588	0.999709	13392	1	-3.5077	0.10129	0.10093	0.967039	1969	0	-3.5077	0.994433
EOMES	3	0.46095	0.61615	0.999709	11507	1	-3.5602	0.10129	0.10093	0.967039	1970	0	-3.5602	0.994433
F7	3	0.90133	0.90143	0.999709	16919	0	-3.6924	0.10129	0.10093	0.967039	1971	0	-3.6924	0.994433
RPS18	1	0.89822	0.89871	0.999709	16858	0	-2.901	0.10178	0.1018	0.971344	1972	0	-2.901	0.992338
GHSR	2	0.80946	0.80893	0.999709	15332	0	-3.2468	0.10179	0.10181	0.971344	1973	0	-3.2468	0.992295
AHNAK2	3	0.38292	0.53787	0.999709	10047	1	-4.0404	0.10476	0.10444	0.971344	1974	0	-4.0404	0.979805
IL9	3	0.41435	0.56964	0.999709	10618	1	-3.1732	0.10481	0.10449	0.971344	1975	0	-3.1732	0.979597
ZNF438	3	0.85163	0.85296	0.999709	15995	1	-3.9613	0.10486	0.10454	0.971344	1976	0	-3.9613	0.97939
KIAA0930	3	0.9804	0.98054	0.999709	18489	0	-2.9248	0.10491	0.10459	0.971344	1977	0	-2.9248	0.979183
C7orf25	3	0.9895	0.98961	0.999709	18674	0	-2.3671	0.10496	0.10464	0.971344	1978	0	-2.3671	0.978976
SYT2	2	0.45163	0.50935	0.999709	11332	1	-3.5619	0.1054	0.10539	0.971344	1979	0	-3.5619	0.977159
MAK	2	0.98188	0.98179	0.999709	18521	0	-2.7678	0.1054	0.10539	0.971344	1980	0	-2.7678	0.977159
CCDC103	2	0.40222	0.47657	0.999709	10397	1	-3.5962	0.1054	0.10539	0.971344	1981	0	-3.5962	0.977159
LAX1	2	0.98818	0.98797	0.999709	18648	0	-2.6824	0.1054	0.10539	0.971344	1982	0	-2.6824	0.977159
SMIM4	3	0.33232	0.48624	0.999709	9108	1	-3.6542	0.10557	0.10524	0.971344	1983	0	-3.6542	0.976459
TRIM35	3	0.63396	0.71373	0.999709	13350	1	-4.14	0.10557	0.10524	0.971344	1984	0	-4.14	0.976459
C11orf1	3	0.98938	0.9895	0.999709	18670	0	-2.8088	0.10557	0.10524	0.971344	1985	0	-2.8088	0.976459
PRR14	3	0.82421	0.82987	0.999709	15549	1	-3.7062	0.10557	0.10524	0.971344	1986	0	-3.7062	0.976459
SLC24A2	3	0.80932	0.81825	0.999709	15323	1	-3.338	0.10557	0.10524	0.971344	1987	0	-3.338	0.976459
CSRNP2	3	0.19229	0.33992	0.999709	6331	2	-4.6527	0.10557	0.10524	0.971344	1988	0	-4.6527	0.976459
PIGA	3	0.061445	0.14437	0.989265	2726	2	-4.4756	0.10557	0.10524	0.971344	1989	0	-4.4756	0.976459
CLIC6	3	0.46308	0.61826	0.999709	11553	1	-3.7015	0.10557	0.10524	0.971344	1990	0	-3.7015	0.976459
RAB11FIP3	3	0.23346	0.38339	0.999709	7148	2	-4.5882	0.10557	0.10524	0.971344	1991	0	-4.5882	0.976459
FBXO3	3	0.21285	0.36173	0.999709	6744	1	-2.9797	0.10557	0.10524	0.971344	1992	0	-2.9797	0.976459
NFIB	3	0.909	0.90911	0.999709	17067	0	-2.5639	0.10557	0.10524	0.971344	1993	0	-2.5639	0.976459
PRICKLE4	3	0.08676	0.19534	0.995571	3656	2	-4.4733	0.10557	0.10524	0.971344	1994	0	-4.4733	0.976459
LCN2	3	0.12868	0.27093	0.999709	5068	2	-4.7726	0.10557	0.10524	0.971344	1995	0	-4.7726	0.976459
NEUROG2	3	0.86013	0.8607	0.999709	16153	1	-2.4579	0.10557	0.10524	0.971344	1996	0	-2.4579	0.976459
OR52B4	3	0.9759	0.97609	0.999709	18397	0	-3.7155	0.10557	0.10524	0.971344	1997	0	-3.7155	0.976459
CYP3A7-CYP3A51P	3	0.54904	0.67504	0.999709	12642	1	-3.3795	0.10557	0.10524	0.971344	1998	0	-3.3795	0.976459
ATP8A1	3	0.097114	0.21534	0.995571	4029	2	-4.846	0.10557	0.10524	0.971344	1999	0	-4.846	0.976459
[truncated: 16,886 more rows]
